# Supplementary material for: Genome-Wide miRNA Seeds Prediction in Archaea
Source: Archaea. 2014 May 14;2014:671059. doi: 10.1155/2014/671059 (PMC4053300; doi:10.1155/2014/671059)
Supplement: Supplementary file 1 — Supplementary S1: List of candidate seeds that were extracted from 115 archaeal genomes. The conservation signal is above background with a P-value <0.05 followed by Bonferroni post hoc correction. Supplementary S2: List of miRNA target sites that were detected with ‘Window Conservation Score' value greater than the ‘Conservation Score of 95th percentile' in related species. The sites overlapped with coding regions were discarded. See the Material and Methods section for more details. Supplementary S3: Detail information of the functional enrichment analysis results using DAVID. There are 38 species approved in this analysis. These tables are generated from the DAVID analysis, and we simply integrate them together using the original description. The field definitions are added on the top of each table to make it more clear. The type of GO term or KEGG pathways can be found in the Category column. [file 671059.f1.xls]

## Sheet: Sheet1
Seeds	P-value
AAAATGG	0
AAAGGTG	0
AAGAAGA	0
AAGGAGA	0
AAGGTGA	0
AATGGAG	0
AATGGCA	0
ACGACGT	0
ACTGGAA	0
AGAAGAA	0
AGAAGGA	0
AGATGGA	0
AGGAAGA	0
AGGAGGA	0
AGGTGAT	0
ATATGGA	0
ATGAAAA	0
ATGAAAG	0
ATGAAGA	0
ATGAAGG	0
ATGGAAA	0
ATGGAAG	0
ATGGAGA	0
ATGGAGC	0
ATGGATG	0
ATGGCAA	0
ATGGCAG	0
ATGTACG	0
CGAACTC	0
CGACGAG	0
CGTCGTC	0
CTCGACG	0
CTCGTCG	0
CTTCTTC	0
GAAAAGG	0
GAAGAAG	0
GAAGAGG	0
GAAGGAG	0
GACGACG	0
GAGAAGG	0
GAGGAAG	0
GAGGAGG	0
GAGGTGA	0
GAGTTCG	0
GATGAAA	0
GATGAAG	0
GATGATG	0
GATGGAA	0
GGAAAAA	0
GGAAAAG	0
GGAAGAA	0
GGAAGAG	0
GGAGAAG	0
GGAGGAG	0
GGAGGAT	0
GGAGGTG	0
GGATGAA	0
GGTGAAA	0
GGTGATA	0
GGTGATT	0
GTCGTCG	0
GTGATGA	0
TATGAAA	0
TATGAAG	0
TATGGAA	0
TATGGAG	0
TATGGAT	0
TCATCGG	0
TCGACGA	0
TCGTCGA	0
TCGTCGG	0
TGGAAAA	0
TGGAAAG	0
TGGAAGA	0
TGGAGGA	0
TGGATGA	0
TGGGAAG	0
TGGTGAT	0
TGTACGA	0
TTATGAA	0
TTATGGA	0
TTCGACG	0
TTTTTTA	0
TTTTTTT	0
AGGAGAA	2.13529e-14
ATGGAGG	2.13529e-14
GAAGAAA	2.13529e-14
GGGAAGA	2.13529e-14
GTCATCG	2.13529e-14
TAGATGG	2.13529e-14
TGGACGA	2.13529e-14
TGGCAAA	2.13529e-14
TTTGGTG	2.13529e-14
AGAGGAA	3.86169e-14
GATGGAG	3.86169e-14
GGAATGG	3.86169e-14
GGCAAGA	3.86169e-14
GGAGTAC	5.5561e-14
ATGAAGT	7.3333e-14
CGAGTTC	7.3333e-14
GAATGGA	7.3333e-14
TCGACGT	7.3333e-14
TGGAGAT	7.3333e-14
ATTATGG	8.72593e-14
CATGGAG	8.72593e-14
TCGCCGA	8.72593e-14
ATGGATC	1.18738e-13
GAAGATG	1.18738e-13
GACGTCG	1.18738e-13
GAGTTCA	1.31999e-13
TACGACG	1.79864e-13
ACGAACT	1.94463e-13
TGTGGAA	1.94463e-13
ATGGATA	2.22894e-13
TGAGGTG	2.99868e-13
GGTGGTA	3.1293e-13
TCGGCGT	3.41281e-13
GGAGGAA	3.84532e-13
GGTGATG	3.96553e-13
CTTCGGC	4.53748e-13
CATCATC	4.94998e-13
AGGTGGT	6.09957e-13
CGTCGAG	6.49266e-13
TTGGTGA	6.73304e-13
CGACGAC	7.84077e-13
ATGGAAC	8.78687e-13
TTTTTAA	1.17188e-12
AATGAAG	1.61648e-12
CTACGAC	1.80092e-12
GAAATGT	1.84292e-12
TGGGGAA	1.92583e-12
ATGATGA	1.95249e-12
AGGAGGT	2.34721e-12
AAATGGA	2.34324e-12
TCGAGGA	2.37966e-12
ATGATGG	2.4022e-12
TATGGAC	2.53039e-12
TCGGCGA	2.84086e-12
AAGGTGG	2.96405e-12
ACGACGA	3.53924e-12
TCGTCGT	4.6469e-12
AATGGAA	4.67808e-12
GACCTCG	5.08959e-12
CATGGAA	5.1929e-12
AGGTGGA	5.48253e-12
GGAAGAC	5.55686e-12
ATGGCTA	5.75365e-12
CTACGAG	6.02136e-12
GAGAAAG	6.23675e-12
TGAAGAT	6.57027e-12
TGATGAG	6.62292e-12
GAAGTTC	6.59129e-12
AAATGGC	6.74987e-12
CATGTAC	6.91819e-12
AGGAGAT	7.09604e-12
AGATGGG	7.96968e-12
ACATGGA	8.08076e-12
ATGAGGA	8.05259e-12
GGAGATA	8.97223e-12
ATGGACG	9.33587e-12
CATCGGC	9.89791e-12
GTCGACG	9.85922e-12
GCTGGAA	1.31615e-11
ATGGAGT	1.71428e-11
GAACTCC	1.72589e-11
GGTGGAA	2.18455e-11
GTGGAAG	2.21712e-11
TGATGAA	2.34545e-11
TGGAACA	2.39493e-11
TACGAGG	2.39579e-11
AAATGGT	2.51339e-11
TGGAGGT	2.50406e-11
TGGGATG	2.53784e-11
TTGGAGA	2.68181e-11
AAGAAGG	3.02222e-11
CGAGGAA	3.1288e-11
TGAAAGT	3.25468e-11
TTCGGCG	3.47908e-11
CATGGGC	3.60869e-11
CGTCGAC	4.08676e-11
AAGACGA	4.58261e-11
AGATGGC	4.8935e-11
GTGCAGG	5.87145e-11
AAGATGG	5.86322e-11
GTATGGA	5.85311e-11
CCTCGAC	6.20903e-11
GTATGGG	6.36315e-11
ATGGCTG	6.3351e-11
TGGAAGG	6.65305e-11
AAAGATG	7.43669e-11
ACTACGA	8.17982e-11
TGATGGA	1.0491e-10
CTACGGC	1.06407e-10
GGTGAGA	1.09779e-10
CATGGAC	1.12706e-10
TTGCAGG	1.14243e-10
ATGTACA	1.1498e-10
ATGAGTG	1.25894e-10
TGCAGGT	1.29932e-10
ATGGTAC	1.30489e-10
TGCGGAA	1.34743e-10
TGAAGGC	1.58488e-10
TGAGGAA	1.74275e-10
GAACTCG	1.84444e-10
ATGATAG	2.0003e-10
GTACGAG	2.01922e-10
ATGTGGG	2.24033e-10
GAAAAAG	2.39335e-10
GATAAGG	2.73091e-10
ATTATGA	2.874e-10
AGTTCGG	3.30742e-10
ATGGGAT	3.44095e-10
TTGGAGG	3.58559e-10
TGGAATT	3.57799e-10
TTTGGAG	3.60432e-10
TGGCAGA	4.68545e-10
CTTTTTT	5.15316e-10
GGAAATG	5.15591e-10
GGTAAGA	5.27649e-10
ATAGGTG	5.30968e-10
GTTCGAC	5.42206e-10
TGAAGGT	5.39977e-10
GATGAGG	6.78311e-10
CAGGAAG	7.00652e-10
TTGGTGG	7.03951e-10
TAGGAGA	7.34405e-10
TCGAACT	9.0521e-10
GAAATGG	9.1521e-10
TGGTGGA	9.44581e-10
GACTACG	9.7237e-10
CTGGGAA	1.03759e-09
GTCTTCG	1.03319e-09
GGAGTTC	1.03992e-09
CTGTGGA	1.25466e-09
AGATGAA	1.27129e-09
GACGAGG	1.35413e-09
GTTGAAG	1.38718e-09
ATGGGAG	1.4846e-09
GAGGTGG	1.49888e-09
GCATGGG	1.58033e-09
TAGAGGA	1.80241e-09
AGGTGAA	1.92031e-09
AATGGCT	2.22956e-09
ATGAGAA	2.24649e-09
CTTCGAC	2.26784e-09
TGAAGGA	2.39834e-09
CGAGAAG	2.48226e-09
AATATGG	2.55738e-09
TATGAGA	2.64242e-09
AGAGGTG	2.80265e-09
AGTTCGA	3.07797e-09
GTGGAGG	3.15248e-09
CGATGAA	3.47966e-09
TGGGACA	3.67274e-09
ATGAGAG	3.67804e-09
GTTGGAA	3.67804e-09
TGGCAGG	3.67674e-09
ATGAAGC	4.03899e-09
GGAAAGG	4.15101e-09
GATGGCA	4.31391e-09
GAACTGG	4.3828e-09
GAGGATT	4.61517e-09
CGTCGGC	4.64662e-09
GGGAGAT	4.69893e-09
GGGAGGA	4.72263e-09
ATGGTAA	4.8542e-09
TCATCAC	4.84124e-09
CCTCTTC	5.26548e-09
AGATGGT	5.65405e-09
AACATGG	5.70755e-09
TGGAGAG	5.73605e-09
GACGAAC	5.79885e-09
TGAAGAA	6.07906e-09
TGGGGTA	6.33656e-09
GAGGAAC	6.86961e-09
TTTTAAA	6.84849e-09
CGTCTTC	8.14859e-09
ACTGGGA	8.2577e-09
AATGGGA	8.28795e-09
CGTCATC	8.30495e-09
ATATGCC	8.70005e-09
ACGAGGA	8.91748e-09
ATGGGTA	9.09762e-09
GAACACG	9.09762e-09
CAATGGC	9.45263e-09
CGACGTC	9.84651e-09
AGATGAG	1.03281e-08
TCTTCGG	1.07246e-08
GAGGTGT	1.09137e-08
GTAGGAG	1.10158e-08
TATGATA	1.15799e-08
ATGGAAT	1.30023e-08
GGAGATG	1.31447e-08
CCATGGA	1.36618e-08
GTATGAG	1.45211e-08
GGTAAAG	1.47927e-08
ATGAACG	1.51565e-08
CGAGTAC	1.51476e-08
AGAAGGT	1.6673e-08
ACATGGC	1.7261e-08
AGGAACT	1.74114e-08
GACTTCG	1.91852e-08
GGTAAAA	2.01054e-08
GATGGGA	2.10206e-08
CCGACGA	2.16399e-08
GCGGAAA	2.17646e-08
AAGAGGC	2.23747e-08
CAGATGG	2.35489e-08
AAAGAAG	2.34944e-08
GGAGAGA	2.38325e-08
TATGGCT	2.51264e-08
AAGAGGA	2.55514e-08
GGGAAGG	2.59831e-08
TTGATGA	3.19676e-08
TATGGTA	3.27914e-08
ATGGGAA	3.28021e-08
GTTCTTC	3.3537e-08
GTGGAAA	3.40409e-08
CATCTTC	3.41463e-08
GAAGAAC	3.4533e-08
ATGGGAC	3.516e-08
CTCGAAG	3.51948e-08
CGACTTC	3.51223e-08
GAATGGC	3.73533e-08
GGTGGAG	3.88383e-08
TGATGAT	3.93109e-08
CATCGAC	3.96994e-08
TATGCAG	4.01893e-08
TGGAACT	4.04945e-08
CTCGAAC	4.12535e-08
ATGGACC	4.13441e-08
GCATGGA	4.3261e-08
CTGGAAC	4.3587e-08
CGAGGAG	4.73094e-08
AGCTGGA	4.74946e-08
TCGAGGT	5.08192e-08
GGACAAG	5.10088e-08
CATGCCA	6.03746e-08
TGGAGAA	6.15398e-08
ACGTCGT	6.20615e-08
ATATGGC	6.25081e-08
GATGAGC	6.28124e-08
GGAACTC	6.33124e-08
AAGATGC	6.37382e-08
CTATGAA	6.52726e-08
TCTTCGA	6.52422e-08
CGACGCC	6.70337e-08
ATGAGCG	6.72923e-08
CGACGAA	7.10667e-08
AAGGAAG	7.32678e-08
AACTGGA	7.36988e-08
CATGAAA	7.55682e-08
CATGAGA	8.02294e-08
CTGGAGG	8.09926e-08
GGATGGG	8.61691e-08
CGACGTG	9.10977e-08
ATGTGGA	9.6992e-08
GAGGAGT	1.05513e-07
AGATCGG	1.15883e-07
TTGGAAA	1.17892e-07
TGAAGTT	1.22503e-07
TAGGTGA	1.22781e-07
TAAAGGT	1.22923e-07
TGCTGGA	1.26867e-07
TCCAGTT	1.26799e-07
AGATGAT	1.29224e-07
GATGAAC	1.2946e-07
TTGAAGG	1.31651e-07
GGAATAC	1.32769e-07
TCATGAA	1.33743e-07
GAGCTGG	1.33875e-07
TCCTCGT	1.35271e-07
CTACGTC	1.41779e-07
TACGGCG	1.51627e-07
GTACTTC	1.51879e-07
TGGAAGT	1.57757e-07
CATGAGC	1.63257e-07
CCTCGTC	1.63181e-07
TCTGGGA	1.63637e-07
ATTTTTT	1.67163e-07
GGCGGAA	1.74073e-07
CGGTGAT	1.77039e-07
GAAGAGA	1.79405e-07
TCGATGG	1.86123e-07
ATGGTTG	2.10818e-07
TATGGGC	2.19232e-07
CGACCTC	2.3559e-07
ATGGTGA	2.39398e-07
AGGGAGA	2.40405e-07
ATGGGTC	2.43404e-07
AGGAGTA	2.44701e-07
GAAAAAA	2.58171e-07
TGAAAAA	2.59475e-07
CAGAGGA	2.63807e-07
TAGGTGG	2.66035e-07
CATGGCA	2.75729e-07
AGGTCAT	2.8421e-07
GGGATGA	2.9402e-07
GGATAAG	2.96449e-07
AAGGGAG	2.98438e-07
AGGAGAG	2.98001e-07
TTTATAT	3.13355e-07
TGGAGCT	3.18007e-07
GGAAGGG	3.1939e-07
TGCCCAA	3.51871e-07
TTGGAAC	3.5276e-07
TTGAAGT	3.67036e-07
TTTGGAA	4.0217e-07
CTCATCA	4.18282e-07
TTGTGGA	4.24625e-07
TAATGGA	4.28944e-07
TTAGGTG	4.40292e-07
TCATCGA	4.48582e-07
ATGGACT	4.49413e-07
GCAAGAC	4.52631e-07
GTCGAGG	4.69179e-07
GGGGAAG	4.69751e-07
TAGAAGA	4.74567e-07
TTGAAGA	4.87323e-07
ATGCAGA	4.99247e-07
GACGAGC	4.99354e-07
ATGGCGA	5.13288e-07
AATGGTA	5.17962e-07
TGGTGCC	5.18707e-07
TGCTCGA	5.29065e-07
AGAATGG	5.4432e-07
CCTCATC	5.51816e-07
ACTTCCT	5.53281e-07
GCGGAAC	5.66005e-07
CCTGGAC	5.97082e-07
AAATGGG	6.03706e-07
GAGATGG	6.06199e-07
TTTATGG	6.09589e-07
CTGGAAG	6.26733e-07
ACGTGGG	6.43907e-07
GGATGTG	6.58708e-07
ACGAGCT	6.72226e-07
ATGATAA	6.99611e-07
TGGTTGA	7.17305e-07
AAGAGAA	7.39345e-07
TGGAACG	7.93056e-07
TTATGGG	7.92622e-07
TTCGTCG	8.11903e-07
AGGGAAG	8.67663e-07
GCCGAAG	9.26283e-07
TATGGGA	9.25936e-07
AAATGAA	9.45373e-07
GATATGG	9.48849e-07
GAGGAAT	9.52717e-07
GTGGAAC	9.54738e-07
TGGGGCA	9.84228e-07
GATGGGG	9.82294e-07
TCATGGG	9.91539e-07
AGACGAC	9.92043e-07
GCAAAGG	1.02881e-06
CCACATA	1.04279e-06
ATCGGCG	1.04729e-06
TAGATGA	1.0542e-06
GGTCTAC	1.06745e-06
CATAGGC	1.0668e-06
GAAGGTG	1.06459e-06
TATGAAC	1.0956e-06
AAGATGA	1.09677e-06
CTGGAAA	1.13019e-06
GGAAAGA	1.15002e-06
ACTTCGA	1.16839e-06
GTCATGC	1.17919e-06
ATGGTAG	1.2184e-06
AATGGAT	1.25647e-06
AAAGGGA	1.26942e-06
GTTCCTC	1.39363e-06
GTCTACG	1.42135e-06
GGGGCAT	1.42884e-06
TGCAGGA	1.44447e-06
GGGTGAT	1.51382e-06
AGATGCT	1.55293e-06
TATGGTG	1.59443e-06
CGTGTTC	1.64002e-06
GGAACTG	1.65673e-06
TGGTAAA	1.75806e-06
GTCGTAG	1.90864e-06
GGAACTT	1.91326e-06
ACGCCGA	1.92325e-06
TGGCGGA	1.92418e-06
GTGCCCC	1.97591e-06
CCAATGG	1.98787e-06
TATGATG	2.00815e-06
ATCGACC	2.00871e-06
ATGAGCT	2.03447e-06
CCATGCA	2.04531e-06
GAGAAGT	2.04404e-06
CTGGACC	2.08891e-06
GGGTAAG	2.15737e-06
GAGGAAA	2.15339e-06
CATGAAG	2.16124e-06
AAGAAGC	2.19901e-06
ATGCACA	2.22288e-06
CATGGGA	2.27029e-06
ATTGGAA	2.33272e-06
GGAGGTA	2.32864e-06
TATGGGT	2.39815e-06
ATGCTCG	2.39393e-06
ATAGGGA	2.43871e-06
AGGATGT	2.45786e-06
TCTTCTT	2.46553e-06
ATAGGCC	2.49303e-06
TGGGTAA	2.50687e-06
CGTCGAA	2.59125e-06
AATGGGT	2.59079e-06
GAAGGTC	2.60102e-06
TGGTGGT	2.71634e-06
ACGACGC	2.713e-06
ATGGACA	2.75664e-06
TTTAAAT	2.83241e-06
CTCGGCG	2.85753e-06
GACGTGG	2.85867e-06
ATGGGTG	2.85428e-06
CACGTGG	2.95198e-06
TGTGGAG	2.95357e-06
AGGTGAG	3.02896e-06
GCGAGGA	3.03236e-06
TTGGTGC	3.03835e-06
AAGTTCG	3.0786e-06
TGGCTGG	3.09645e-06
TGGTACC	3.13979e-06
TTTGAGG	3.203e-06
TACTTCC	3.21432e-06
TCGACCT	3.28775e-06
GCTCCAG	3.30661e-06
GACGATG	3.31783e-06
GAAAGAG	3.32831e-06
GTGATTT	3.60075e-06
TATGCCC	3.61234e-06
CTTCTGG	3.60571e-06
ATGGGCG	3.73072e-06
TTGGAAG	3.77946e-06
GTAGAGC	4.02212e-06
TGGATGT	4.11619e-06
AATGGTT	4.22242e-06
AGGAAGC	4.33203e-06
TCATCAT	4.34115e-06
GGTCATG	4.4102e-06
GTGGACG	4.49936e-06
GGAACAG	4.56842e-06
TTTTTGG	4.70684e-06
CTTCCTC	4.73392e-06
AAATGAG	4.96725e-06
CAAAGGG	4.96279e-06
CCAGATG	5.0178e-06
TCGAAGC	5.05821e-06
ATGCCAA	5.09443e-06
AAGGAGG	5.12888e-06
CCCATAC	5.18247e-06
AATGTGG	5.31558e-06
GAGTACG	5.50713e-06
CGAGCTG	5.66726e-06
TTGGGGA	5.68205e-06
TTCTTCT	5.80436e-06
TGGGAAA	5.85295e-06
CATGGAT	5.94608e-06
GTAAGAA	5.99557e-06
AGAAGAG	6.12458e-06
AGGAATG	6.12125e-06
GGATGAG	6.24886e-06
CAGGATG	6.31899e-06
GGGTTCA	6.50644e-06
GATGGTG	6.61767e-06
AAGAGGT	6.68452e-06
GCTGGAC	6.81232e-06
GCGGATG	6.87411e-06
CCAGCTC	7.127e-06
ATGAACC	7.17238e-06
CGACATG	7.16968e-06
GATGAGT	7.23977e-06
GGAGAAA	7.45716e-06
GACGAAA	7.66454e-06
GCAGAGG	7.91289e-06
GGTCGAC	7.94329e-06
TGAAGTA	8.08966e-06
GAAGTAC	8.17483e-06
GTTTATA	8.21527e-06
AGAAAGC	8.34022e-06
GACGCCG	8.62032e-06
ATGGTGG	8.61654e-06
GAAAGGT	8.63127e-06
CATGGGT	8.73447e-06
GGACATC	8.7897e-06
TGAAGAC	8.92913e-06
GAGATAA	8.97924e-06
TGGAAGC	9.01577e-06
AAAGGTT	9.01351e-06
GTAGATG	9.05853e-06
AGGAAAT	9.23921e-06
ATGCCAG	9.27327e-06
ATGTATG	9.32148e-06
GAGGACG	9.7817e-06
TATGCGG	9.89007e-06
CGAGATC	9.97622e-06
CTTCATC	1.0232e-05
GGTATGG	1.02782e-05
AGGAAAA	1.02805e-05
TCAGGTG	1.03983e-05
GGATGGA	1.06393e-05
GAGGAGC	1.07438e-05
TACGACC	1.08258e-05
TTTATGA	1.1108e-05
GTAATGG	1.11151e-05
AGAGGAG	1.11045e-05
TGAAGAG	1.11071e-05
AGGAAGT	1.16658e-05
GGTCATC	1.17218e-05
GGTAATG	1.17569e-05
GGAAGTT	1.2017e-05
TGGGAGA	1.20809e-05
GAAGGTA	1.23479e-05
AGGTAAA	1.25229e-05
ACGAGTA	1.25066e-05
CCCACTC	1.2526e-05
ATGGGGC	1.27609e-05
TGGGCTC	1.27609e-05
GAAGAAT	1.28309e-05
AGGGAGG	1.32318e-05
AGTGCCC	1.3444e-05
GAGGATG	1.34742e-05
GGTGCCC	1.36279e-05
ACGTGGC	1.36628e-05
GGTTCCA	1.39762e-05
CCCAAAG	1.40733e-05
TTCATGG	1.40509e-05
CATGTTC	1.4216e-05
GATGGAC	1.44685e-05
GTGGGGA	1.45751e-05
TTCGAGG	1.47241e-05
TGTGGAC	1.49421e-05
GCAGAAG	1.49309e-05
AATGTAC	1.49309e-05
GGAAGGA	1.50122e-05
GGAGCTG	1.52399e-05
TTCATCG	1.53904e-05
ACGTCGG	1.54883e-05
TGTGCGG	1.58557e-05
GGACAAA	1.60836e-05
TCGGGGT	1.62767e-05
ATAGGAG	1.63278e-05
GAAAGAC	1.66158e-05
GGAATTG	1.66256e-05
ATGCGGC	1.69174e-05
CGAGGTC	1.69112e-05
ACATGTG	1.70734e-05
GTGGGAA	1.70559e-05
TGGACTA	1.7192e-05
TGGATGC	1.72886e-05
GGAGGAC	1.73173e-05
GGAACAT	1.73357e-05
TGGAATG	1.73149e-05
CGAAGTC	1.72902e-05
ATGCTTG	1.74164e-05
GGTGTAG	1.73925e-05
CCGAGGA	1.76852e-05
ACGTGGA	1.78915e-05
GAGGTAT	1.79414e-05
AGGTGTA	1.81417e-05
GTCCAGT	1.8231e-05
AGTCCAG	1.84762e-05
GGAATAG	1.87448e-05
ATGATGT	1.90086e-05
GGCAAAG	1.91068e-05
AGAAAGA	2.00164e-05
AAAAATG	1.99893e-05
GTTCAAG	2.03018e-05
TGGTCGA	2.07477e-05
CGTGGGG	2.12113e-05
CTCTTCC	2.14097e-05
AGTGGAA	2.14143e-05
ATGCCGA	2.14141e-05
CGTGGGC	2.14295e-05
TGGGCAG	2.20258e-05
CATGTGC	2.22048e-05
TGGGTGA	2.32776e-05
AGGTCGT	2.34746e-05
CACCTGG	2.36646e-05
AAGGAGT	2.44555e-05
GAGTACA	2.44859e-05
GCCAAAG	2.48399e-05
AGTATGG	2.49727e-05
TAGGTCC	2.50402e-05
GTTCATC	2.5514e-05
ATGAGCC	2.59842e-05
GAAGACG	2.61238e-05
GGGGAAA	2.63785e-05
CATGCAG	2.63987e-05
GTCGTAC	2.6633e-05
CCAAAGA	2.66263e-05
GTGGATA	2.6629e-05
AGGATGG	2.66749e-05
CTCCTCG	2.66729e-05
TGTGGAT	2.72203e-05
GGTGGGA	2.79874e-05
TTCTGGG	2.81361e-05
GCCGACG	2.82762e-05
GCAGATA	2.82427e-05
GTACAGG	3.01108e-05
ACGTGCA	3.03073e-05
GTGGGCA	3.07262e-05
GGTGTAA	3.12933e-05
CGAGGTA	3.14805e-05
CGTGGAC	3.16767e-05
TCAAGGA	3.18499e-05
AGGCAAG	3.24288e-05
GGGAGGT	3.28842e-05
GTGAAAA	3.28889e-05
ATGCCCA	3.40056e-05
CTTCCCA	3.45706e-05
GCTGATG	3.46244e-05
GATTGGA	3.47225e-05
GACCTGG	3.47729e-05
TTATGAG	3.61431e-05
TTATGAT	3.69632e-05
CAAAGAA	3.905e-05
TGTCCTC	3.93441e-05
ACTTCGG	3.93367e-05
GGGAACT	3.95457e-05
CTCTTCG	4.01093e-05
GATTTGG	4.05945e-05
GAGGAGA	4.10045e-05
CTGGATG	4.17949e-05
CATCGGG	4.18197e-05
AGAGGCA	4.17797e-05
GATGGAT	4.23064e-05
GAGGTCG	4.30382e-05
CAAGTCA	4.30421e-05
GAAGCCG	4.392e-05
AGGAGGC	4.42572e-05
GAGATGA	4.42228e-05
GTCCTCG	4.51307e-05
TCTTCCT	4.51364e-05
TTGGAGC	4.58993e-05
GGTCTTC	4.62176e-05
GGGGTGA	4.62834e-05
AGGTTTA	4.66798e-05
TGACCCA	4.67453e-05
ATGATTG	4.74985e-05
ACATCGA	4.78691e-05
CTTTAAA	4.78386e-05
GAAGAGC	4.80474e-05
ACGTCGA	4.90145e-05
GATGTAG	4.92329e-05
TTTTTTC	4.93659e-05
GTAAAAG	5.04524e-05
GATGGTA	5.11719e-05
GCTGGAG	5.13623e-05
TCATGCA	5.16859e-05
TATGGCA	5.31651e-05
CCACTCG	5.60585e-05
TCGACGG	5.61989e-05
TAGAAGG	5.65754e-05
TCATGGA	5.72816e-05
CGATGTC	5.80945e-05
ATAGAGG	5.82841e-05
GTACTCC	5.83283e-05
TGATAAG	5.88564e-05
CGATGGT	5.90698e-05
AATGCTC	5.99654e-05
AACTACG	5.99778e-05
ATGGGCA	5.99092e-05
TTATGGT	6.04896e-05
ATGGCCA	6.05226e-05
GGTCAAG	6.11214e-05
ATGTTCA	6.15194e-05
TTTAGGT	6.26382e-05
TTAGAGG	6.35268e-05
GAGATCG	6.4861e-05
GAAGTGG	6.60467e-05
TGCAGGG	6.63443e-05
CATATGC	6.67028e-05
CGCCGAA	6.69434e-05
GAAGATC	6.68778e-05
GTTATAG	6.73617e-05
GTAGTCG	6.78806e-05
ATGACTG	6.81764e-05
GGAAGGT	6.84113e-05
TAAGGTG	6.85491e-05
TGGAAAC	6.86407e-05
GATGGCT	7.05002e-05
TGGTAGA	7.10909e-05
AAGGTTT	7.21471e-05
GGAAGAT	7.21558e-05
ATGAAAC	7.31309e-05
CATGTGG	7.31129e-05
AAGAGCT	7.30943e-05
AAAGGAG	7.35051e-05
GGCAGGA	7.38086e-05
GGGTGAA	7.47908e-05
TCGCCCA	7.52149e-05
GTTCAGG	7.62414e-05
TAGCTGG	7.67158e-05
ATGGTGT	7.73228e-05
GACGACC	7.87078e-05
GTCGAAC	7.89197e-05
CGGCGAG	7.91401e-05
AAGTCAT	7.94855e-05
GGAATGA	7.97069e-05
CAGATGT	8.04153e-05
TGTAGGT	8.13553e-05
ATGGCAC	8.29047e-05
GTACGAC	8.29047e-05
AAGGGCG	8.28309e-05
TGCAGAA	8.53193e-05
GAATGAA	8.57977e-05
GATGGCG	8.64476e-05
GACGTTC	8.65193e-05
ATGAATG	8.77472e-05
CGTTCGA	8.76887e-05
TAGTCCA	8.76934e-05
TTGAGGT	8.82876e-05
CGATGGC	8.87451e-05
AAAAGGA	8.88682e-05
TCCTCGA	8.90765e-05
CGTCCTC	8.94145e-05
ATGCGAG	9.14189e-05
CCATGGG	9.13625e-05
TCGAAGA	9.13377e-05
ACAGGAA	9.15552e-05
TGGGTAG	9.14875e-05
ATAGAAG	9.17306e-05
GTACGGC	9.21394e-05
GCAGATG	9.22188e-05
TCCATGG	9.22002e-05
GAGCTTG	9.24136e-05
CGACGGC	9.2867e-05
GACATCG	9.35437e-05
TAGGGAG	9.37663e-05
CCCTATG	9.37992e-05
TCGATGA	9.38664e-05
GGTTTAG	9.39828e-05
GAACGTC	9.46056e-05
TCCTCGG	9.47463e-05
GGCCTAC	9.47486e-05
ATGGCTC	9.49722e-05
AAAAGGT	9.48854e-05
GAAGGCA	9.50716e-05
TCATGGC	9.70486e-05
ATTTGGA	9.71296e-05
CAGTTCG	9.71317e-05
GTGAAGA	9.74818e-05
GAGAAGA	9.82474e-05
TAGGAAA	9.98288e-05
TTATGGC	0.000100301
GGAGGTT	0.000100401
GTCGGCG	0.000100393
AATAGGT	0.000100776
CCACGTC	0.000100672
ATGCGGA	0.000100881
TGTGTAC	0.00010093
TGGTGAA	0.000101511
GAAGGAA	0.000101686
TGTACGT	0.000103684
CATGAAC	0.000104082
ATGGGGA	0.000105452
GGCATGG	0.000107098
ACGACCT	0.000107104
TGTGGGA	0.000111178
TGCACGA	0.000111974
TGGATAT	0.000112564
AAGTATG	0.000112864
GCAGGGA	0.000113268
GTTCGTC	0.000115565
TGGAAAT	0.000117772
CGAAGAA	0.000120473
GGTGCAA	0.000124081
CCTTCAT	0.000124297
CTTCCAG	0.000125083
CAAAGGC	0.000125174
GGAAAGC	0.00012545
GATGGTT	0.000125534
TGGAGTA	0.000127295
AGAGAAA	0.00012761
TTGACCC	0.000127958
ACGAGAT	0.000129773
GTAGGGC	0.000130199
GATGCGG	0.000130053
CGTGGAG	0.000130591
GGTGTTG	0.000130591
AAGTACG	0.000131266
AAATAGG	0.000132553
GAAAAGT	0.000132877
GGGCAAG	0.000134622
ACCTCGA	0.000135547
CAATGGA	0.000135972
CAGAAGG	0.000136134
TCCTGGA	0.000142143
AGGAACC	0.000142941
ATGTCAA	0.000143577
TGATGGT	0.000143562
TCGGTGA	0.000144375
ATGGTTA	0.000146429
GCAGCAG	0.00014638
GAAGCTG	0.000152725
GTAGTAG	0.000152578
AGGTATT	0.000152872
TATCCAG	0.000153004
AGTGTGT	0.000153263
ATGTTTG	0.000153179
TGGACAT	0.000153179
GACGAGA	0.000154774
CCCACGT	0.000154715
GGGTCTA	0.000154963
GCGTGGG	0.000155676
GAGGTCA	0.000159818
ACATGGT	0.000160599
TGGACAC	0.00016118
CGACCTG	0.000161297
AGTTGAA	0.000161868
GAACCTC	0.000161776
TGGTACA	0.000162836
ACCTGGA	0.000163142
TATCTCC	0.000165172
TGGTATT	0.0001662
CATGGCT	0.000166126
AGCTCCT	0.00016655
GCTGAAG	0.000173428
TGCGGCA	0.000173754
CCAGATC	0.000174338
AGATGCG	0.000175107
AAGTGGA	0.000177202
ATGAAAT	0.000179446
GCATGGC	0.000179457
CGACGAT	0.000180232
GGCGAGA	0.000181365
TCCTCCT	0.000182031
AAGTAGG	0.000182005
TCGTAGG	0.000182401
GTGTGGA	0.000182882
CTGGAAT	0.000183747
GGAGGCA	0.000186047
CATGATG	0.000186079
TGGTCAA	0.000186946
TCTACGG	0.00018751
GATCGAC	0.000189765
TGAGTTC	0.000192462
GCCATGA	0.000192342
TGAGAAG	0.000195638
CTCTACG	0.000196068
GTGTATG	0.000200321
TGGTAAG	0.000201167
GGCTGGA	0.000201419
AAAGAGG	0.000203663
ACATGGG	0.000203601
GTGGGTG	0.000206399
TCGGCGG	0.000208277
TGGGAGG	0.00021
AGGTCGA	0.000210558
TTTGGGT	0.000211096
ACGGCAC	0.000211643
GGAAATC	0.00021284
GATGTGG	0.000215489
AGGTGTT	0.000216343
TGGAGTT	0.000217458
ATGGTCA	0.000218998
GTAGAAG	0.000221246
CGACGTA	0.00022107
TGTATGA	0.000221403
TGGACAA	0.00022517
ATGGGCT	0.000225398
TCGAACC	0.000229334
TGCGGAT	0.000229806
CTTCGGG	0.000229583
GAATGGG	0.000230722
CCTGGAT	0.000232709
TGCCGAA	0.000232709
GGCAGAT	0.00023792
AGGGAAT	0.000246869
GTTCTGG	0.000248937
GAACCCG	0.000253751
TAGGAAG	0.000253971
AACTCGA	0.000258371
ACTGGAG	0.000259981
GGAATTC	0.000260353
ACAAGGT	0.000261272
AGGACAT	0.000261272
CGATCCA	0.000262727
GCGTCAT	0.000269232
GATGTAC	0.000270406
GACTGGG	0.000272472
AGCGGAA	0.000273862
AATGCAC	0.000279244
GGGGAAC	0.000280652
TACATGG	0.000282279
TGCCACG	0.000282957
CTATGCT	0.000283684
GCTCGAC	0.000284474
CTCGTAG	0.000290237
AAGAATG	0.000295659
TGGACGG	0.000296818
CATGTCG	0.000301481
TAGACGA	0.000301244
AGGGAAC	0.000303914
CCTCCAG	0.000305726
TTATATA	0.000305904
GCATATG	0.000307017
CATGCAC	0.000308924
CTATGGA	0.000309205
TACTGGG	0.000314499
TGGATCT	0.000314872
TGTTGGA	0.000319285
TCTACGA	0.000325206
AGAAATG	0.000326281
CCTCGGG	0.000327204
CGTTCTC	0.000327152
CGATGGA	0.000336459
GAAAGCC	0.000339322
TACTGGA	0.000339322
TGGAACC	0.000338772
GGTAGGG	0.000340292
GTTGGAG	0.000342635
TATGCCA	0.000342392
CATGCCG	0.0003429
CGTGGGT	0.000343279
GGGACAA	0.000343278
GTAGGTG	0.000344902
CCGTCGA	0.000351328
CAAGGAA	0.000351398
GGGAAGT	0.000352075
GGACGAC	0.000351811
ATAGGAA	0.000355044
ACAGGCC	0.000356298
ATGGGTT	0.000359743
AGATTGG	0.00036549
AGGTATA	0.000365381
TGGTAGT	0.000365083
TCAAGGT	0.000367117
CTGGGAC	0.000368461
AAGAAAT	0.000372857
TCGACAT	0.000375524
TCGCCGT	0.000383055
GGTAGAA	0.000382945
TGAGTGG	0.000382669
ACGGTGA	0.000385229
CGCCCAT	0.000387339
TCTTCTG	0.000388959
GGGCTCG	0.000394148
GAAGGCT	0.000397194
CGAGCTC	0.000399878
TACGAGA	0.000418387
GGGAGAA	0.000421675
AAGGACA	0.000427748
GAAGGAC	0.000428037
TAGGAAC	0.000432153
GTGCTGG	0.000438657
CTTGACG	0.000438631
CGAACTG	0.000442557
CCTCGTA	0.000446251
GTATGGC	0.000452914
TTTTTAT	0.000455715
CCATGAG	0.000456252
TCCACCA	0.000457571
CCTGGAA	0.000469549
CATGCGG	0.000470241
GCGAGAA	0.000471346
GATGATA	0.00047192
TGGCCTA	0.000472535
CCGACCT	0.000474259
TGGCAAG	0.000477944
TGGCTAC	0.000478503
AGGACGA	0.000480866
TTCCTCT	0.00048208
ATGAGGC	0.000482409
GATGGGT	0.000491933
GTACTAC	0.000498439
GGTGCAG	0.000503861
ATATGAA	0.000504168
GTGGAGA	0.000505832
TGGAGGC	0.000507436
AGGGGTG	0.000507494
ATGGGGT	0.000507494
AATGAAA	0.000510058
GTCATGG	0.000513968
TTATAGG	0.000516708
CCATCGA	0.000520205
TTTTTTG	0.000522608
GAAATAC	0.000523086
ATCATCG	0.000526045
ATATGCA	0.000526031
TCCACAT	0.000530866
AAAATGA	0.000546847
GAATTCC	0.000551402
GAGGTGC	0.000556864
AGAAGGG	0.000556876
ACATGAG	0.000563418
GGGGTAC	0.00056319
TTAAAGG	0.000566096
GGTATGA	0.000566759
CGGAAGG	0.000567318
GTTGAAA	0.000569037
TGGATAA	0.000570535
GGTGGTG	0.000572175
CGGAACT	0.000575083
GTGGACA	0.000576356
ATGATGC	0.000576691
GGACGAA	0.000580407
GACCATG	0.00058051
TGGTGTT	0.000580261
GGTATGC	0.000583582
ACGAGGC	0.000591842
AAATGCA	0.000600875
AGGAGTT	0.000601597
GTAGTTG	0.000603111
AGAAGCC	0.000604278
TTGCAGA	0.00061953
ATGTCCT	0.000619211
GATGCTC	0.000619211
GGATGTA	0.000627011
ATGTGCG	0.000628393
TTGAGGA	0.000631262
ATTCCAG	0.000631604
ATAGGCG	0.000633194
TGGCACG	0.000636069
GTCCAGG	0.000640876
TTGAGGG	0.000640806
AGTTCGT	0.000643081
GTTTATG	0.000645548
GCAGGAA	0.000658092
AAGTACC	0.000659113
GAATAGG	0.000662017
TCCTCTA	0.000662551
TCGTCTA	0.000668132
GCGATGA	0.000671958
GCGAGTT	0.000674936
TCATGAG	0.000682274
GGAAGCT	0.000683343
CGGGGAA	0.000683808
TACGTGG	0.000684643
ACTCGTC	0.000688398
TGGGTCA	0.000696712
CCTGGTA	0.000705779
CGACGTT	0.000706594
CCTCCTC	0.000711444
GTGTTGG	0.000720777
CGGATGG	0.000721552
CATGGGG	0.000727148
GTGTACG	0.000732397
TATTATG	0.000733707
ACTATGA	0.000735357
GTCGATC	0.000740754
CTGGCAT	0.000745083
AGTAGGA	0.000747402
TGGTATG	0.000750966
AGTTCGC	0.000750464
GGAACAC	0.000754951
AAAAAGG	0.000760787
CAGGTGG	0.000766111
ACTTTTT	0.000767518
AGATTTG	0.000771691
CCATGTA	0.000791198
GAGCTTC	0.000791765
TAGGGAC	0.000804278
CAAGAAG	0.000803623
GGCGATC	0.000807076
GTTGAGG	0.000815684
GCAAAGA	0.000817207
GAACAGA	0.000818565
GGGGTTC	0.00081962
GAAAGTT	0.000820549
ATGCGCG	0.000831646
GAAGGGG	0.000830952
GGTTCAT	0.000837487
AGAAGAT	0.000845698
AGGGATA	0.000848396
ATGCCAC	0.000853854
ATCTCGA	0.000854661
TGCATGG	0.000901223
GAGTGGA	0.000900521
AAGGGAA	0.000907115
CTCCCAC	0.000908685
CCTGTGG	0.000915004
AGGGTGG	0.000928437
GAAAACC	0.000928131
ACTACAC	0.000927791
TCTTCCA	0.000929782
TCATGCC	0.000933311
CGAGGAC	0.000932818
CGGGGTC	0.000943935
CATGGCG	0.000947187
ACGACCG	0.000951124
CGAAGGC	0.000955004
GACCGGG	0.000967508
GGGGGGA	0.000966844
AGAAAAG	0.00097264
GTAGGTA	0.000973468
CGGAAAG	0.000976939
GCATATA	0.000999508
GGGTGGA	0.00101142
GGGGGAT	0.00101409
AGGTGCT	0.00101613
GGATTTG	0.00103434
GTGAAAT	0.00103926
GAAGGAT	0.00104363
GGGAATG	0.00104951
AAGGTTA	0.00106957
CTTCACA	0.00107542
TCGATCC	0.00108133
CGAGGAT	0.00108881
TCGGGCA	0.00110017
GATAGGG	0.00110604
GCAGGAT	0.00110836
GAAGCCC	0.00110915
CCTGGGG	0.00111134
AGGTGGG	0.00111959
ATGCAGG	0.00111903
TTCCAGG	0.00114089
TGGGCAA	0.00114486
GTGGGAC	0.00114439
AGTACAG	0.00114592
GAATATG	0.00116056
AGGAACA	0.00116546
GGATGCA	0.00116584
GCCGTCG	0.00116543
CTATGAC	0.00117009
AGGAGCA	0.00117354
GTGCGGA	0.00118072
GAAGATA	0.0011915
GGGAACC	0.0011967
TGGAATA	0.00120019
ATATGAG	0.00120881
ATGCTTC	0.00120837
GCATGAA	0.00120871
TCTACCC	0.00121335
CTGGTAC	0.0012178
GCAATAG	0.0012212
TTCGGTG	0.00122589
TGGAGTG	0.00123392
ACTGGTG	0.00124317
GTGATAT	0.0012513
GTTCCAC	0.00126257
TGGATCC	0.00127136
GTCGACA	0.00127253
CAAGCCC	0.00127284
AGTACTT	0.00128291
ATGTCCC	0.0013019
GTATGCC	0.00131401
GTTATGA	0.00131862
CCCGAGG	0.00132532
GGCAGGG	0.00132559
ACGTACT	0.00132504
GCCCCTA	0.00133622
TGTCCCA	0.00133906
AAGGGAT	0.00134576
ACTCGAA	0.00136839
ACTTCGT	0.00139721
TTGATGG	0.00140526
CTACAGG	0.00142223
CCCTGGG	0.0014213
CCTATGC	0.00142289
CTGCCCA	0.00142423
TGTTCCC	0.00143497
TATGTGG	0.00144221
TTGGATG	0.00145156
CGGCGAA	0.00145378
GGTCGTC	0.00146715
AACGTCG	0.00146634
AGTACGA	0.00148731
TTCCAGT	0.00150354
GTGGTAC	0.00152427
ATGCAGT	0.00152604
GAGCTAA	0.00153129
GGCTACG	0.00153942
TATGAGT	0.00154102
CGTGGTC	0.00154189
GTTCATG	0.00154582
GTTGGTG	0.0015587
ACGATGT	0.00155901
GGATGAT	0.00155897
AGGACAA	0.00156117
CAATGGG	0.00156372
TTTATGC	0.0015728
GCGACGA	0.00157708
TCCAGCG	0.00158205
TCACATG	0.00158152
TCGAGCA	0.00158615
CTGGATA	0.00158689
GTCTTCT	0.00158727
ATTGGTG	0.00159264
TCGGCAT	0.00159487
GAAAGCT	0.00159524
GGAGCAC	0.0016077
GTCAAGG	0.00162838
AGGAGCT	0.00163179
GGGACCA	0.00164456
CACATGG	0.00165014
CCCATGC	0.00165899
ATTGAAG	0.0016654
TGTATGT	0.00168959
TCCAGGA	0.00169227
TGGAGCA	0.00169326
TAGGTGC	0.00171078
AGACGAG	0.00171744
CGTCTAC	0.00172097
TGGATAC	0.00172078
GCAAATG	0.00173198
AGAAGGC	0.00174023
CACGTGC	0.00176952
TGGACCA	0.00176923
CCTCTGG	0.00176852
ATGCAAG	0.00178181
AATGAGA	0.00178514
GTCAAAG	0.00178621
CCCGTTC	0.00180528
TACGATG	0.00180607
AAGTGGG	0.00181606
GGCAAAA	0.00181905
TGGACTG	0.00182942
AGGAAGG	0.00182991
GGGAAAA	0.00183262
GACCTTC	0.00183209
CGGCAAG	0.00183293
ATGGTCC	0.00184679
ACTACGC	0.0018505
GTGTTCG	0.00185101
AAAAAAG	0.00185332
CATCTAC	0.00186628
CATCACC	0.0018725
ATCGGCC	0.00188316
GATGAGA	0.00188731
CGGAGGA	0.00189649
GGGAAAG	0.00190167
GCTATGA	0.00191851
TATGAGG	0.00191974
TCATCCC	0.00191866
CGGCGTA	0.00192003
CCCCTGG	0.00193514
ATATGGG	0.00194501
AGCTTGG	0.00195221
GAGTTCC	0.00195177
CGGAACG	0.00196852
TCAAGTC	0.0019957
GTTCGAG	0.00199443
ATTGGGG	0.0020011
GACGAAG	0.00201608
TGGCTTC	0.00202472
GAAGACA	0.00202653
TTTTGGT	0.00202712
GTGGTCA	0.00204887
GTGGTAT	0.00206122
GTATTTC	0.00207012
GTTCGGC	0.00207425
TCGAAGT	0.00208038
GGCAACA	0.00208389
GATGCCC	0.00208328
CAAGCTC	0.00208748
AGACCAG	0.00209013
CGTCGTA	0.00209788
TTAGGGA	0.00209657
TGCAGTA	0.00209793
TGGACCC	0.00212295
ACGAGGT	0.00213038
GGCGTGA	0.00213924
ATGCACC	0.00215948
GGGGTAA	0.00216723
ACTACAT	0.00216679
TCTGCGG	0.00217457
TTCCAGC	0.00218598
AGGATTT	0.00218536
GGAAGCC	0.00218615
CAAGGAG	0.00218748
CTGGTGC	0.00218936
GTTGACG	0.00218961
GATGATC	0.00220277
CTTCCTT	0.00220578
TCATCTA	0.00221336
AGAGTTC	0.00221499
GCGAACT	0.00222438
GTGGATG	0.00224286
AAGGATG	0.00224545
CTATGTA	0.00224442
CCCGAGC	0.00224576
CTCATGT	0.00224611
AAATATG	0.00225054
GACGTGC	0.00224917
CGAAGAG	0.00225308
GGACACC	0.00225836
TGTCCAA	0.00226622
GAAAAAC	0.00232135
AGATACA	0.00232426
AGAGAAG	0.00232354
AGGAAAG	0.00232357
ATGTCCA	0.00232995
CCCTGGA	0.00232995
TCCAGCT	0.00232932
TTGACGC	0.00234103
ATGAACA	0.0023489
GAAGTCC	0.002349
CATGGCC	0.00235952
GTCGACC	0.00235905
AGTACGT	0.00236189
GGATGCG	0.00236189
GTACTGG	0.00237149
ATTGGAG	0.00239614
GCTCGAA	0.00241728
CTGGGAT	0.00241816
GAAGGGC	0.00242931
GGGGTGG	0.00243206
GGTGGTT	0.00243139
AACTTCG	0.00243177
TTAGGAA	0.00243237
CGAAATC	0.00245047
AATGAGC	0.00246569
GTCGAGC	0.00247539
TGATAGA	0.00249172
TAATAGG	0.00249092
TTCAGGT	0.0024969
TATGTCG	0.00250244
TGTGGGC	0.00250244
GTACACC	0.00250073
TGGATAG	0.00252279
CGAAGCC	0.00252935
ATCTCCT	0.00253562
TGGGACC	0.00255828
AGCTCGA	0.00256127
TAGACCA	0.00256405
CGATGTA	0.00256394
ATCGAAG	0.00256567
ATCATCA	0.00257194
GTGGCAA	0.0025888
TAAGAAG	0.00261516
CGTCGGG	0.00261659
GTGTAGG	0.00265067
AGAAGTA	0.00265631
TGGGTCT	0.00265553
TGGCTCG	0.00266572
CCACGTG	0.00266915
TTGGCAG	0.00266915
GGACGAG	0.00267495
ATGGCCT	0.0026881
ATGGTCG	0.0026881
CGAGAAC	0.00268693
TTTTATA	0.00271889
TTATTGG	0.00272431
GTCGTCT	0.00272369
AGGTGCA	0.0027346
AAATGTG	0.00277454
TGAAGCC	0.00277454
TATGACG	0.00277288
TGCAAAG	0.00279644
ATGCTCC	0.00282443
CTCGTAC	0.00282316
GACATCC	0.00284737
CTTATGA	0.0028634
TTAATGG	0.00289513
ACGTACA	0.00289634
GATGTCC	0.00290659
GAACAGG	0.0029121
CATGGTC	0.00291195
GGTCCAT	0.00292248
GCGAGAT	0.002935
TGTGCAG	0.00295143
AGAGGGA	0.0029879
TACTACG	0.00298809
GGCTCCA	0.0029888
AAGGTGT	0.00301399
TTCATGA	0.00302607
GCATGTC	0.00302661
GCCCAAG	0.0030328
GGACTGG	0.00307759
GGTGGGG	0.00307582
ATGCCGG	0.00310686
TAGGCGG	0.00310829
GGTTAAG	0.00311233
ACACCAA	0.00312971
GAAATCG	0.00312951
ACGAGAA	0.00312873
TGAAGCT	0.00315137
CAGATCG	0.00316126
AGCAGAT	0.0031751
GATGTCA	0.00317925
CATGACA	0.00318631
CGGCAAA	0.00318565
AGTATGA	0.00318694
CTTCGTC	0.00319891
TGCCTAG	0.00321681
GTACGTC	0.00322639
GAGTACT	0.00323161
TACGTCG	0.00324025
TGGACGT	0.00324165
GCGGGAA	0.00324079
GCGAGCT	0.0032478
GTGGAAT	0.00325175
GTCATCC	0.00325299
CGCCGAG	0.00328183
ACGATGG	0.00328306
GTATTCT	0.00328995
AGGTTGG	0.00331186
CGTTCAT	0.00331186
TCCTCCA	0.00331392
AGTTCCC	0.0033208
TAGGCCT	0.00332332
TGGCGAG	0.00332773
GCAATGG	0.00336424
GTGGGGC	0.00336424
GGTGATC	0.00336725
GTAAGAC	0.00336841
TGCGGTA	0.00337165
TGCGGGG	0.00338126
GGAGGTC	0.00339866
TGGCCAA	0.00340483
GACTACA	0.00342655
AAGTTCC	0.00345413
AAAAAGC	0.00346804
GGCGTAG	0.00348184
GCTATGG	0.00347982
GGCCCGA	0.00351618
CTTGGTA	0.00353636
AGATCGC	0.00354909
TTCGAAG	0.00354866
CAAGGTG	0.00359257
CCCATTC	0.00360694
GGGCATC	0.00361371
TGGGGTG	0.00361475
GTACCAG	0.00363705
GTCGATG	0.00363478
CCATAGG	0.00368549
GCGATCG	0.0037155
AATGAGG	0.00373578
GCAGGTC	0.00373948
GGACGTG	0.00379669
CGGCTTC	0.00379834
TGCACCT	0.00379814
CGCTCGA	0.00379625
TCATGTA	0.00379631
ATGGTTC	0.00382233
AGGATGA	0.00384482
GGTAGAT	0.00384476
TTCATCA	0.00384331
CGCCTTC	0.00384578
TGGTGGG	0.0038709
GGCTTCG	0.00386851
TGGACCT	0.00387703
TGGCATA	0.00390451
AATGGAC	0.00390213
CGGCGTG	0.00390447
TGGTGCA	0.00390639
AGGCCTC	0.00394563
GAGTTTG	0.00397807
TTGTAGG	0.00401045
ATATGGT	0.00404361
GTCCTCT	0.00406421
CGGCATG	0.00407785
TGTATGC	0.00409438
TGGAGGG	0.00409562
GTCATAG	0.0041251
CTTCGAG	0.00413961
AGGCGGA	0.00415688
AGTGTCC	0.00415653
TGAACGA	0.00417397
CATGTCA	0.00417252
TGGGATA	0.00417242
CAAATGC	0.00418542
GAGTGGG	0.00422773
TGGGTCC	0.00423868
AATGCGA	0.00425903
TATGCGA	0.0042739
GTTCGCC	0.00427713
TGGACCG	0.00430517
GAGAATG	0.00432849
CGTCCAC	0.00432854
CGATCTC	0.004395
ACCCAAA	0.00445736
GCTCGAT	0.00446049
GGTTCGA	0.00446049
CAAATCC	0.00446643
ATCGAGG	0.00446941
GGAAAGT	0.00446679
GGACCTT	0.00446632
GAGATGC	0.00449603
GGAACGT	0.00451764
CACGTCG	0.00451857
GCTCTTC	0.00451931
ATGCCCG	0.00453088
CTCCAGC	0.00454688
CCGTGGG	0.00457758
GATGGGC	0.00459155
GAAAAGA	0.00460363
CATAACC	0.0046213
GGAGTTG	0.00462515
CAAGGTT	0.00462971
GTATGAC	0.00480796
GGGGACT	0.00485994
AATAGGA	0.00487901
AGGGACA	0.00487767
ACAAGCA	0.00488668
GCGTAGA	0.00488378
GTGACGA	0.00488797
CCAGGAA	0.00493514
GCAAAAG	0.00494369
CGCTCAT	0.00494079
GATGACG	0.00501174
GCCCAGT	0.00503298
TGATGCC	0.00503911
GCTTGAA	0.00504727
ACTTCCA	0.00505694
TTTGAAG	0.00511265
GCCCACG	0.00512257
AAGATGT	0.00515182
TGGTACG	0.00516407
CGGTGAA	0.00517358
GGTCCTA	0.00519846
GATGTTC	0.00522119
AATGCCA	0.00522075
GATGACC	0.00522224
GGGTATG	0.00522256
CGGGTAC	0.00522445
AGATCGA	0.0052485
TGGGTTG	0.00525615
TAAGAGG	0.00526106
TAGGTGT	0.0052589
GATCATC	0.00525856
TATATGA	0.00525717
GACATGA	0.00527374
TTAAATA	0.00527773
ACGTCGC	0.00527763
CGAACAC	0.00531469
CGATGCA	0.00531663
TAGGTAT	0.00535189
GGTTCTT	0.00535072
GTAGACG	0.00535188
GGAGCAG	0.00534933
GTACATG	0.00539686
CTTCGCC	0.00541039
CAGGTCG	0.00544464
AAGCGCG	0.00547659
GGGTTCG	0.00550567
CAGGGAA	0.00550248
GACGAGT	0.00552386
TGATCGA	0.00560325
AGATGTT	0.0056025
TCGGGCT	0.00560557
ACCCACT	0.00567291
GGACTAC	0.00567616
ACCTCGC	0.00568036
ACCGGGA	0.00568922
GACAAGG	0.00572145
GAGAGAG	0.00577736
CTACACA	0.00577823
AAGCCTC	0.00577533
TGAAATG	0.00579939
TGTTCGC	0.00579594
CGTGACG	0.00583208
GATGCAG	0.0058287
ATGCAGC	0.00583362
CTGGGGT	0.00585848
TGGAGAC	0.00586304
CCAGAAG	0.00586686
CCTGCAA	0.00588278
TTGGCGG	0.00588278
TGTGAAG	0.005888
AGGTCCT	0.00589777
AGAGTGG	0.00590868
AGAACCT	0.00591624
ATGTACC	0.00595538
TGGGACG	0.00595538
CGTGGCA	0.00595712
TGCTCCA	0.00595525
GGTTTGG	0.00595483
ACGTGCC	0.00595165
GAGCTCG	0.0059545
GGAGTGG	0.0059545
ATCACAT	0.00597571
CGGATGC	0.00601614
GTGGGCT	0.00601614
ACTACGT	0.00607912
TGACGAC	0.00609203
GTTGTAG	0.00610129
ATATCGT	0.00611043
CATGGTG	0.00615873
TGGGTTC	0.00615873
CCCAAGG	0.00616999
GACCACG	0.00618226
GCGGAAT	0.00620123
AGCGTGG	0.00620626
AGGCTGA	0.00632199
ATGTGTA	0.00635853
TACCCAC	0.00635853
TTGATGC	0.0063642
ATGAGGT	0.0063885
AAATGTC	0.00638859
GACTTCC	0.00643342
GAACCCA	0.00646004
CTGTTCG	0.00647359
AAAAGAA	0.00647371
TTCGGGC	0.00648505
GAAATGC	0.00651133
GAATGGT	0.00651316
TTTACGG	0.00651316
CCAGTTC	0.00653149
CGTTGAC	0.00657359
CTTTGGA	0.00659022
GGAAGCG	0.00658849
CTTCCAT	0.00659378
TGAAGCA	0.00659352
CCGATGG	0.00661509
TGCCCAG	0.00661509
TGGCATG	0.00660971
GTAGACC	0.00660665
CGTACAA	0.00661491
CGGGAAG	0.00663216
TAAAATG	0.00665955
ACGTTCC	0.00666621
CCATTTG	0.00670101
GCCGAGG	0.00673112
AGGTCCA	0.00672791
ACCACTC	0.00674992
ATGTCGC	0.0067689
CGTCCAG	0.00677671
CGGGTTC	0.00681262
TGGTTTA	0.00682606
TACGTTG	0.00682983
GTTTGGA	0.00684726
GCAGGAG	0.00685066
AACAGCG	0.00685192
TGTGGTA	0.00686571
AAGAGGG	0.0068778
CTTGAAG	0.0068778
TAAATGG	0.00687729
ACTCGAC	0.00690613
CTTCCTG	0.0069466
CCATGCT	0.00695185
CGAGCTT	0.00700663
CACCTAC	0.00701157
TTTGGCG	0.00707646
CAAGAGG	0.00709261
GGCGAAG	0.00712583
TCTGGAT	0.00712844
ACGACGG	0.00717395
GCCCAGG	0.00717988
CAAGACG	0.00719947
GGGCTGG	0.0072256
AAGGTAT	0.00724926
GGTATTT	0.00726511
GCCTTCT	0.00726253
AGGTAGA	0.00728086
CTGGACA	0.00728428
CTTTAGG	0.00732484
TCGCGGA	0.00739115
GAGGGGA	0.00740147
GGACCAA	0.00739807
AGTTGCA	0.00740501
AAGAAAA	0.00741307
CACGACG	0.00741291
CTTTGGG	0.00745189
ACGTTGA	0.00747637
CAGGAAT	0.0074785
AATATGA	0.00761461
GTGAGGA	0.00766853
AGGACCT	0.00772464
GAGTACC	0.0077221
GACATGG	0.00781121
CAACGAC	0.00785692
ATGTTCC	0.00786244
ACATGCA	0.00786436
TGCGATG	0.00786436
AGTTGGA	0.00790936
TCGACCA	0.00791052
ATCGACG	0.00791638
GAGAAAT	0.007926
GTACAAG	0.00793143
AAAATGC	0.0079323
TTCCCGG	0.00793031
TAGGCCC	0.00794107
TCGATCT	0.00797616
GGTACAA	0.00801374
AAGGTCA	0.00801753
CGATGGG	0.00801423
AGTTTGG	0.00802207
CAAATGG	0.00808686
ACTACGG	0.0080851
GCGAGGT	0.00808414
TTGGTAT	0.00809851
CAATACC	0.00810241
TCCTGCA	0.00811117
GTCGAAG	0.00810883
GAAATCC	0.00817192
GGCTACA	0.00818901
ATGTCTG	0.00819646
GGAATGT	0.00819646
GTTTACG	0.00819646
GGTACAG	0.00822393
CCTTTGC	0.0082385
ACACCTT	0.00828593
CCAGACG	0.00828593
TGAGCTT	0.00829419
CAGGTCC	0.00830717
TGGTTCG	0.00838718
GGATGTC	0.00848517
TGGGGAG	0.008531
TTCCTGC	0.0085442
TGCTCGG	0.0085475
CATCGAT	0.00864049
AACATCC	0.00863659
GCTTCCA	0.00863659
TGAGAAT	0.00864093
TAGTAGG	0.00864128
AAAGTAC	0.00870983
TCTTCAC	0.00871407
CCTACCG	0.00872302
AACAGGA	0.00874102
TAGAGGC	0.00875548
ACGGCAT	0.00876182
AAGGTAA	0.00877649
ACTCCTC	0.00877649
ACTGGTA	0.00877857
GCTGTGG	0.00883853
TTGAAAG	0.00900121
ACAGATG	0.00899977
CGTAGAC	0.00906702
TGGGGCC	0.00912371
CTGGTCC	0.00912921
ACGTCCT	0.00913177
CCCGACG	0.00915752
CGCATGG	0.00916207
GGATTTT	0.0093023
TCGAGCT	0.00931524
TACCCCA	0.00931418
CCGGAAT	0.00933755
CTGGTAA	0.00933755
GGAATCC	0.00934315
CAAAAAG	0.00934044
AGGATTC	0.00935853
GAGGGAG	0.00936748
TACAAGG	0.00937153
TAGGGCA	0.00938195
GAAAGGG	0.00948189
GCGGTAG	0.00948454
GCATACA	0.00948954
ATAAAGG	0.00948711
CGAAAAG	0.00955431
AAAGGCA	0.00962086
CTATGCC	0.009671
CTGGTGG	0.00974069
CCAGCTT	0.00977818
GCCGAAC	0.00983463
GGCGAGG	0.00985196
TGAAAAT	0.00985376
GACGATC	0.00987222
ACTCATC	0.00987711
CACGAAC	0.00994904
GTGGTAG	0.00994998
CCTTTGG	0.00995806
TCAGATG	0.0100204
ACACCCT	0.0100308
AGGTTTG	0.0100312
TGATAGG	0.0100587
AAGAAGT	0.0100809
GCCCATG	0.0100947
TCGGGTA	0.0100947
GTTCGAT	0.0101461
AAGGTCC	0.0101407
GTGAGAA	0.0101536
ATGCGGT	0.010155
GAACATC	0.0101994
AACGACG	0.010251
TTTATAA	0.010249
GGAAGGC	0.0102623
GGAACCC	0.0103047
TATGTAC	0.0103047
CTGATGG	0.0102984
GATGCTT	0.0103011
GCTCATG	0.0103078
AGGTACC	0.0103027
TATGAGC	0.0103274
TGCCCCA	0.0103576
AAGGCAT	0.0103743
CGGTATG	0.0103994
AATGCCC	0.0104262
CTGAACG	0.0104357
AAGAAAG	0.0104398
GTGCCCT	0.0104721
GCATTCG	0.0105168
TGGTGTA	0.0105229
GCTTGAC	0.0105509
ATGAGGG	0.0105943
TGGCTGA	0.0106653
TTCCACG	0.01067
GGAACGA	0.0107356
GTACTCG	0.0107521
TGACTAC	0.0107873
TGGATTT	0.0108438
GAAGTAT	0.0108393
TCGGCAA	0.0108439
GCACCTA	0.0108504
GGAGATC	0.0109391
ACATTTG	0.0109605
GTGGGTT	0.0109738
CTACCCC	0.0109907
GAATTGG	0.0110093
TATGCCT	0.011059
TAGGAGG	0.0110648
TGAAAGG	0.011101
CTATACC	0.0111027
AAAGTAT	0.0110978
CGAATGC	0.0110959
TGTTCGG	0.0110946
GTATCCT	0.0111174
AAATGCG	0.0111358
GGATGCC	0.0111435
ATGCCAT	0.0111462
CAAGGAC	0.0111918
ATGGGCC	0.0112113
TTGGACC	0.0112221
AGTTCCT	0.0112165
TTAGGTA	0.0112157
GCGTCGA	0.0112254
GTATACC	0.0112482
TCGTAGT	0.011292
CAGATGC	0.011296
TGCATCT	0.011296
TCCAGGT	0.0112912
AGGGGCA	0.0113066
CTCGCCG	0.0113268
AGCTTGA	0.0114169
ATGCATC	0.0114605
CTGCGGA	0.0114608
GTATAGG	0.0114608
TGTGATG	0.0114538
CTACCCA	0.0114592
AAGGAAC	0.0114622
CATCGAG	0.0114981
CATCTCC	0.0114981
GGGTCCT	0.0115527
TGAACCC	0.0115598
CATGTCC	0.0115877
ACCTCAT	0.0116282
CCTCCAC	0.0116312
CCAAATG	0.0116371
GTTGCAG	0.0116817
GGACCCA	0.0116975
TACCAGG	0.0116975
AGGGATC	0.0117604
ATGACGA	0.0117803
CGTACTC	0.0117975
GGCTCGA	0.0117975
GCCTTCG	0.0117915
GAAGGTT	0.0117881
TATTGGA	0.0118471
ATGAACT	0.0119674
TCTGCGA	0.011962
TGCCCAT	0.011962
CAAACGG	0.012074
CCCGAAG	0.0121515
GACCTTG	0.0121521
TCGTAGC	0.0122282
TCGACCC	0.0123066
CCGAGGT	0.012346
AAAGTAG	0.0124136
GCCGATG	0.0124177
CCACTCC	0.012455
GGGACAC	0.0124609
GAAGGGA	0.0124563
CATGGTT	0.0124871
TGCCAGA	0.0126049
TTCGGCA	0.0126049
TTACTGG	0.0126526
AGGGGGA	0.0126645
CTGGGAG	0.0126778
AACTCCG	0.0126828
GAATTCG	0.0126791
CCTTCCA	0.0126748
CGGGACC	0.0127297
ACATGAC	0.0127441
CCATGAA	0.0127501
GGGATAG	0.0127996
GAAGGCC	0.0128232
CGGCGTC	0.0128731
CCTCCCA	0.0130191
GAAGTAA	0.0130277
ACATAGG	0.0131588
TCTGCCA	0.0131543
AGGGTGA	0.013233
CATAGGG	0.0132268
CAGATCA	0.0132401
GTCGAGT	0.0132562
AAGAGAT	0.0132925
CGATGAT	0.0133592
CTCCTCC	0.0133613
AAGAACC	0.0134405
CATTCCC	0.0134456
GTGGATT	0.0134872
TAAATAC	0.0134868
CATGTAT	0.0134883
AAAGGAA	0.0136124
AATGGGG	0.0136312
CAGATCT	0.0136312
TAGTTGG	0.0136312
GGTCCAG	0.0136389
CAGATGA	0.0136404
CGTACAT	0.0138009
GAAAGGC	0.013893
AATGCGG	0.0139295
ACTGCGG	0.0139645
CTGGAGC	0.0140772
ACCGGAA	0.0141293
[truncated: 650 more rows]
