# Supplementary material for: Genome-Wide miRNA Seeds Prediction in Archaea
Source: Archaea. 2014 May 14;2014:671059. doi: 10.1155/2014/671059 (PMC4053300; doi:10.1155/2014/671059)
Supplement: Supplementary file 2 [file 671059.f2.xls]

## Sheet: Sheet1
Species	Strand	Seed/target sites	Target genes
AE000782	P	259639	AF0279
AE000782	P	259642	AF0279
AE000782	P	259643	AF0279
AE000782	P	383854	AF0424
AE000782	P	383855	AF0424
AE000782	P	383856	AF0424
AE000782	P	383857	AF0424
AE000782	P	383861	AF0424
AE000782	P	383862	AF0424
AE000782	P	383863	AF0424
AE000782	P	448823	AF0490
AE000782	P	506192	AF0555
AE000782	P	506193	AF0555
AE000782	P	506194	AF0555
AE000782	P	517445	AF0570
AE000782	P	517446	AF0570
AE000782	P	518546	AF0573
AE000782	P	539034	AF0596
AE000782	P	539035	AF0596
AE000782	P	684667	AF0765
AE000782	P	684668	AF0765
AE000782	P	684669	AF0765
AE000782	P	708588	AF0795
AE000782	P	708589	AF0795
AE000782	P	708590	AF0795
AE000782	P	708591	AF0795
AE000782	P	708592	AF0795
AE000782	P	763060	AF0856
AE000782	P	763061	AF0856
AE000782	P	763062	AF0856
AE000782	P	763064	AF0856
AE000782	P	763065	AF0856
AE000782	P	763066	AF0856
AE000782	P	838825	AF0937
AE000782	P	838826	AF0937
AE000782	P	838827	AF0937
AE000782	P	964459	AF1059
AE000782	P	964460	AF1059
AE000782	P	964461	AF1059
AE000782	P	964462	AF1059
AE000782	P	1006387	AF1130
AE000782	P	1006388	AF1130
AE000782	P	1006420	AF1130
AE000782	P	1006421	AF1130
AE000782	P	1006422	AF1130
AE000782	P	1006423	AF1130
AE000782	P	1006432	AF1130
AE000782	P	1006433	AF1130
AE000782	P	1006739	AF1131
AE000782	P	1006740	AF1131
AE000782	P	1309584	AF1450
AE000782	P	1523236	AF1700
AE000782	P	1881951	AF2092
AE000782	P	1881954	AF2092
AE000782	P	1987878	AF2223
AE000782	P	2064714	AF2304
AE000782	P	2064722	AF2304
AE000782	P	2064723	AF2304
AE000782	P	2064724	AF2304
AE000782	P	2064725	AF2304
AE000782	P	2064726	AF2304
AE000782	P	2064727	AF2304
AE000782	M	94288	AF0098
AE000782	M	94289	AF0098
AE000782	M	94290	AF0098
AE000782	M	96213	AF0101
AE000782	M	96214	AF0101
AE000782	M	160982	AF0181
AE000782	M	234283	AF0257
AE000782	M	234284	AF0257
AE000782	M	234285	AF0257
AE000782	M	234286	AF0257
AE000782	M	234287	AF0257
AE000782	M	234290	AF0257
AE000782	M	234291	AF0257
AE000782	M	234292	AF0257
AE000782	M	234293	AF0257
AE000782	M	234294	AF0257
AE000782	M	234300	AF0257
AE000782	M	234304	AF0257
AE000782	M	234305	AF0257
AE000782	M	234306	AF0257
AE000782	M	234307	AF0257
AE000782	M	234308	AF0257
AE000782	M	549880	AF0610m
AE000782	M	549885	AF0610m
AE000782	M	715139	AF0805
AE000782	M	715140	AF0805
AE000782	M	715141	AF0805
AE000782	M	715144	AF0805
AE000782	M	715146	AF0805
AE000782	M	715147	AF0805
AE000782	M	715148	AF0805
AE000782	M	715149	AF0805
AE000782	M	763064	AF0857
AE000782	M	780657	AF0878
AE000782	M	780658	AF0878
AE000782	M	780665	AF0878
AE000782	M	780673	AF0878
AE000782	M	780674	AF0878
AE000782	M	780677	AF0878
AE000782	M	780678	AF0878
AE000782	M	1159112	AF1298
AE000782	M	1612343	AF1796
AE000782	M	1612344	AF1796
AE000782	M	1612345	AF1796
AE000782	M	1612346	AF1796
AE000782	M	1612347	AF1796
AE000782	M	1612348	AF1796
AE000782	M	1723482	AF1923
AE000782	M	1723483	AF1923
AE000782	M	1723485	AF1923
AE000782	M	1859682	AF2065
AE000782	M	1986684	AF2222
AE000782	M	1987876	AF2224
AE000782	M	1987877	AF2224
AE000782	M	1987878	AF2224
AE000782	M	2047012	AF2286
AE000782	M	2047013	AF2286
AE004437	P	11455	VNG0011C
AE004437	P	13204	VNG0014C
AE004437	P	13224	VNG0014C
AE004437	P	13225	VNG0014C
AE004437	P	26644	VNG0030H
AE004437	P	26645	VNG0030H
AE004437	P	26646	VNG0030H
AE004437	P	37987	VNG0044H
AE004437	P	37988	VNG0044H
AE004437	P	38009	VNG0044H
AE004437	P	38010	VNG0044H
AE004437	P	38011	VNG0044H
AE004437	P	38012	VNG0044H
AE004437	P	38013	VNG0044H
AE004437	P	38015	VNG0044H
AE004437	P	57561	VNG0059H
AE004437	P	57564	VNG0059H
AE004437	P	57570	VNG0059H
AE004437	P	66597	VNG0070H
AE004437	P	66598	VNG0070H
AE004437	P	66599	VNG0070H
AE004437	P	179328	VNG0213H
AE004437	P	179330	VNG0213H
AE004437	P	179331	VNG0213H
AE004437	P	179333	VNG0213H
AE004437	P	179334	VNG0213H
AE004437	P	213064	VNG0262C
AE004437	P	213065	VNG0262C
AE004437	P	353958	VNG0458G
AE004437	P	444685	VNG0576C
AE004437	P	444686	VNG0576C
AE004437	P	444687	VNG0576C
AE004437	P	444688	VNG0576C
AE004437	P	620356	VNG0819C
AE004437	P	620357	VNG0819C
AE004437	P	620358	VNG0819C
AE004437	P	620361	VNG0819C
AE004437	P	732390	VNG0960G
AE004437	P	732391	VNG0960G
AE004437	P	732453	VNG0960G
AE004437	P	732992	VNG0961G
AE004437	P	732993	VNG0961G
AE004437	P	733055	VNG0961G
AE004437	P	773960	VNG1008G
AE004437	P	773961	VNG1008G
AE004437	P	774023	VNG1008G
AE004437	P	785970	VNG1025H
AE004437	P	869002	VNG1148G
AE004437	P	968539	VNG1296C
AE004437	P	1060248	VNG1423H
AE004437	P	1060258	VNG1423H
AE004437	P	1060259	VNG1423H
AE004437	P	1060260	VNG1423H
AE004437	P	1063642	VNG1429C
AE004437	P	1063656	VNG1429C
AE004437	P	1185766	VNG1587H
AE004437	P	1185768	VNG1587H
AE004437	P	1185769	VNG1587H
AE004437	P	1185771	VNG1587H
AE004437	P	1185772	VNG1587H
AE004437	P	1199940	VNG1610C
AE004437	P	1232435	VNG1653H
AE004437	P	1262200	VNG1693G
AE004437	P	1272389	VNG1719G
AE004437	P	1412645	VNG1906H
AE004437	P	1412646	VNG1906H
AE004437	P	1647424	VNG2217G
AE004437	P	1649817	VNG2219G
AE004437	P	1676498	VNG2252G
AE004437	P	1689149	VNG2269G
AE004437	P	1699166	VNG2282C
AE004437	P	1699202	VNG2282C
AE004437	M	11461	VNG0013C
AE004437	M	11463	VNG0013C
AE004437	M	13417	VNG0015H
AE004437	M	13745	VNG0016H
AE004437	M	13746	VNG0016H
AE004437	M	30298	VNG0035H
AE004437	M	30309	VNG0035H
AE004437	M	30311	VNG0035H
AE004437	M	30348	VNG0035H
AE004437	M	32500	VNG0039H
AE004437	M	32504	VNG0039H
AE004437	M	32508	VNG0039H
AE004437	M	32510	VNG0039H
AE004437	M	32511	VNG0039H
AE004437	M	32512	VNG0039H
AE004437	M	32513	VNG0039H
AE004437	M	32514	VNG0039H
AE004437	M	32515	VNG0039H
AE004437	M	34589	VNG0042G
AE004437	M	34592	VNG0042G
AE004437	M	34593	VNG0042G
AE004437	M	34595	VNG0042G
AE004437	M	34596	VNG0042G
AE004437	M	34597	VNG0042G
AE004437	M	34620	VNG0042G
AE004437	M	47188	VNG0052H
AE004437	M	47189	VNG0052H
AE004437	M	47190	VNG0052H
AE004437	M	95956	VNG0112H
AE004437	M	95957	VNG0112H
AE004437	M	95958	VNG0112H
AE004437	M	95959	VNG0112H
AE004437	M	95973	VNG0112H
AE004437	M	166325	VNG0194H
AE004437	M	166326	VNG0194H
AE004437	M	237057	VNG0301C
AE004437	M	409969	VNG0532H
AE004437	M	412632	VNG0536G
AE004437	M	412633	VNG0536G
AE004437	M	412635	VNG0536G
AE004437	M	412636	VNG0536G
AE004437	M	412640	VNG0536G
AE004437	M	412642	VNG0536G
AE004437	M	412643	VNG0536G
AE004437	M	412645	VNG0536G
AE004437	M	412646	VNG0536G
AE004437	M	412647	VNG0536G
AE004437	M	449419	VNG0587H
AE004437	M	565779	VNG0749G
AE004437	M	565780	VNG0749G
AE004437	M	590036	VNG0784G
AE004437	M	590037	VNG0784G
AE004437	M	592125	VNG0789C
AE004437	M	737562	VNG0967Gm
AE004437	M	737563	VNG0967Gm
AE004437	M	737575	VNG0967Gm
AE004437	M	737576	VNG0967Gm
AE004437	M	811137	VNG1064H
AE004437	M	858607	VNG1130H
AE004437	M	858608	VNG1130H
AE004437	M	884920	VNG1175G
AE004437	M	884922	VNG1175G
AE004437	M	921955	VNG1227H
AE004437	M	921957	VNG1227H
AE004437	M	953441	VNG1270H
AE004437	M	953442	VNG1270H
AE004437	M	1002768	VNG1344G
AE004437	M	1002770	VNG1344G
AE004437	M	1154831	VNG1546H
AE004437	M	1304100	VNG1764G
AE004437	M	1309285	VNG1769Cm
AE004437	M	1474367	VNG1995C
AE004437	M	1474368	VNG1995C
AE004437	M	1474369	VNG1995C
AE004437	M	1474388	VNG1995C
AE004437	M	1474389	VNG1995C
AE004437	M	1478933	VNG2001G
AE004437	M	1478934	VNG2001G
AE004437	M	1478935	VNG2001G
AE004437	M	1478936	VNG2001G
AE004437	M	1478938	VNG2001G
AE004437	M	1478939	VNG2001G
AE004437	M	1478940	VNG2001G
AE004437	M	1508917	VNG2049C
AE004437	M	1627018	VNG2196G
AE004437	M	1663050	VNG2234G
AE004437	M	1663051	VNG2234G
AE004437	M	1663052	VNG2234G
AE004437	M	1663053	VNG2234G
AE004437	M	1805709	VNG2410G
AE004437	M	1805711	VNG2410G
AE004437	M	1805712	VNG2410G
AE004437	M	1867544	VNG2501C
AE004437	M	1867545	VNG2501C
AE004437	M	1867546	VNG2501C
AE004437	M	1867547	VNG2501C
AE004437	M	1968782	VNG2631H
AE004437	M	1987843	VNG2652H
AE004437	M	1987847	VNG2652H
AE004437	M	1987865	VNG2652H
AE004437	M	1987868	VNG2652H
AE004437	M	1987876	VNG2652H
AE004437	M	1989644	VNG2654Gm
AE004437	M	1989645	VNG2654Gm
AE004437	M	1989646	VNG2654Gm
AE006641	P	89413	SSO0109
AE006641	P	132368	SSO0157
AE006641	P	200614	SSO0231
AE006641	P	200615	SSO0231
AE006641	P	200617	SSO0231
AE006641	P	200618	SSO0231
AE006641	P	200621	SSO0231
AE006641	P	220145	SSO0254
AE006641	P	220146	SSO0254
AE006641	P	220147	SSO0254
AE006641	P	220148	SSO0254
AE006641	P	220149	SSO0254
AE006641	P	233284	SSO5542
AE006641	P	233328	SSO5542
AE006641	P	233329	SSO5542
AE006641	P	233330	SSO5542
AE006641	P	233717	SSO0273
AE006641	P	233719	SSO0273
AE006641	P	233727	SSO0273
AE006641	P	233730	SSO0273
AE006641	P	239309	SSO0280
AE006641	P	239310	SSO0280
AE006641	P	239311	SSO0280
AE006641	P	239312	SSO0280
AE006641	P	362322	SSO0416
AE006641	P	371831	SSO5826
AE006641	P	371832	SSO5826
AE006641	P	371833	SSO5826
AE006641	P	371834	SSO5826
AE006641	P	371835	SSO5826
AE006641	P	371841	SSO5826
AE006641	P	371842	SSO5826
AE006641	P	371863	SSO5826
AE006641	P	371867	SSO5826
AE006641	P	385684	SSO5866
AE006641	P	385687	SSO5866
AE006641	P	385688	SSO5866
AE006641	P	385689	SSO5866
AE006641	P	385690	SSO5866
AE006641	P	385702	SSO5866
AE006641	P	385703	SSO5866
AE006641	P	385725	SSO5866
AE006641	P	385727	SSO5866
AE006641	P	471894	SSO0541
AE006641	P	471895	SSO0541
AE006641	P	551558	SSO0636
AE006641	P	551560	SSO0636
AE006641	P	551599	SSO0636
AE006641	P	551600	SSO0636
AE006641	P	660418	SSO0774
AE006641	P	660420	SSO0774
AE006641	P	660422	SSO0774
AE006641	P	660424	SSO0774
AE006641	P	660459	SSO0774
AE006641	P	682617	SSO0797
AE006641	P	682618	SSO0797
AE006641	P	682619	SSO0797
AE006641	P	682621	SSO0797
AE006641	P	682622	SSO0797
AE006641	P	682625	SSO0797
AE006641	P	682626	SSO0797
AE006641	P	682627	SSO0797
AE006641	P	682628	SSO0797
AE006641	P	682629	SSO0797
AE006641	P	682630	SSO0797
AE006641	P	682631	SSO0797
AE006641	P	682636	SSO0797
AE006641	P	682639	SSO0797
AE006641	P	682640	SSO0797
AE006641	P	682641	SSO0797
AE006641	P	682642	SSO0797
AE006641	P	682643	SSO0797
AE006641	P	682644	SSO0797
AE006641	P	682645	SSO0797
AE006641	P	685843	SSO0801
AE006641	P	685844	SSO0801
AE006641	P	685865	SSO0801
AE006641	P	685866	SSO0801
AE006641	P	685867	SSO0801
AE006641	P	685868	SSO0801
AE006641	P	685869	SSO0801
AE006641	P	685870	SSO0801
AE006641	P	730547	SSO0850
AE006641	P	730548	SSO0850
AE006641	P	730549	SSO0850
AE006641	P	730573	SSO0850
AE006641	P	730574	SSO0850
AE006641	P	730575	SSO0850
AE006641	P	730578	SSO0850
AE006641	P	730579	SSO0850
AE006641	P	730584	SSO0850
AE006641	P	730588	SSO0850
AE006641	P	732638	SSO0852
AE006641	P	735725	SSO0858
AE006641	P	756101	SSO0887
AE006641	P	756104	SSO0887
AE006641	P	756105	SSO0887
AE006641	P	756106	SSO0887
AE006641	P	774010	SSO0907
AE006641	P	774011	SSO0907
AE006641	P	774013	SSO0907
AE006641	P	774015	SSO0907
AE006641	P	774016	SSO0907
AE006641	P	774046	SSO0907
AE006641	P	774047	SSO0907
AE006641	P	774048	SSO0907
AE006641	P	774050	SSO0907
AE006641	P	784999	SSO0922
AE006641	P	785000	SSO0922
AE006641	P	786562	SSO0925
AE006641	P	786563	SSO0925
AE006641	P	786573	SSO0925
AE006641	P	786576	SSO0925
AE006641	P	786577	SSO0925
AE006641	P	786580	SSO0925
AE006641	P	786584	SSO0925
AE006641	P	786586	SSO0925
AE006641	P	786587	SSO0925
AE006641	P	829351	SSO0969
AE006641	P	829353	SSO0969
AE006641	P	834301	SSO0975
AE006641	P	834302	SSO0975
AE006641	P	834304	SSO0975
AE006641	P	834305	SSO0975
AE006641	P	837017	SSO0977
AE006641	P	837023	SSO0977
AE006641	P	837024	SSO0977
AE006641	P	837026	SSO0977
AE006641	P	837027	SSO0977
AE006641	P	837029	SSO0977
AE006641	P	837030	SSO0977
AE006641	P	837034	SSO0977
AE006641	P	837036	SSO0977
AE006641	P	837038	SSO0977
AE006641	P	894643	SSO1033
AE006641	P	908302	SSO7114
AE006641	P	908303	SSO7114
AE006641	P	913764	SSO1053
AE006641	P	913768	SSO1053
AE006641	P	957847	SSO1107
AE006641	P	957848	SSO1107
AE006641	P	957850	SSO1107
AE006641	P	957851	SSO1107
AE006641	P	957852	SSO1107
AE006641	P	969555	SSO7239
AE006641	P	969563	SSO7239
AE006641	P	969566	SSO7239
AE006641	P	969567	SSO7239
AE006641	P	973151	SSO1131
AE006641	P	1040450	SSO7389
AE006641	P	1040451	SSO7389
AE006641	P	1040498	SSO7389
AE006641	P	1040499	SSO7389
AE006641	P	1174920	SSO1336
AE006641	P	1245273	SSO1396
AE006641	P	1245274	SSO1396
AE006641	P	1245275	SSO1396
AE006641	P	1245276	SSO1396
AE006641	P	1245277	SSO1396
AE006641	P	1245278	SSO1396
AE006641	P	1245279	SSO1396
AE006641	P	1342998	SSO1484
AE006641	P	1342999	SSO1484
AE006641	P	1343000	SSO1484
AE006641	P	1343001	SSO1484
AE006641	P	1343004	SSO1484
AE006641	P	1343005	SSO1484
AE006641	P	1352480	SSO1498
AE006641	P	1352482	SSO1498
AE006641	P	1352483	SSO1498
AE006641	P	1352509	SSO1498
AE006641	P	1352510	SSO1498
AE006641	P	1352511	SSO1498
AE006641	P	1352512	SSO1498
AE006641	P	1352513	SSO1498
AE006641	P	1352522	SSO1498
AE006641	P	1352523	SSO1498
AE006641	P	1352526	SSO1498
AE006641	P	1374578	SSO8288
AE006641	P	1374589	SSO8288
AE006641	P	1374593	SSO8288
AE006641	P	1374594	SSO8288
AE006641	P	1374596	SSO8288
AE006641	P	1374597	SSO8288
AE006641	P	1374598	SSO8288
AE006641	P	1405745	SSO8359
AE006641	P	1405747	SSO8359
AE006641	P	1405748	SSO8359
AE006641	P	1405749	SSO8359
AE006641	P	1450031	SSO1602
AE006641	P	1450032	SSO1602
AE006641	P	1450033	SSO1602
AE006641	P	1450593	SSO1603
AE006641	P	1450612	SSO1603
AE006641	P	1450613	SSO1603
AE006641	P	1450614	SSO1603
AE006641	P	1450615	SSO1603
AE006641	P	1480378	SSO1627
AE006641	P	1480379	SSO1627
AE006641	P	1480380	SSO1627
AE006641	P	1480381	SSO1627
AE006641	P	1493869	SSO1639
AE006641	P	1493870	SSO1639
AE006641	P	1493888	SSO1639
AE006641	P	1493889	SSO1639
AE006641	P	1493890	SSO1639
AE006641	P	1493891	SSO1639
AE006641	P	1493892	SSO1639
AE006641	P	1493909	SSO1639
AE006641	P	1493910	SSO1639
AE006641	P	1493911	SSO1639
AE006641	P	1493912	SSO1639
AE006641	P	1493913	SSO1639
AE006641	P	1493914	SSO1639
AE006641	P	1493915	SSO1639
AE006641	P	1537987	SSO8687
AE006641	P	1537988	SSO8687
AE006641	P	1537990	SSO8687
AE006641	P	1537991	SSO8687
AE006641	P	1550078	SSO1699
AE006641	P	1550079	SSO1699
AE006641	P	1550083	SSO1699
AE006641	P	1554555	SSO1708
AE006641	P	1554557	SSO1708
AE006641	P	1562462	SSO1722
AE006641	P	1562463	SSO1722
AE006641	P	1562467	SSO1722
AE006641	P	1562480	SSO1722
AE006641	P	1736514	SSO1916
AE006641	P	1736515	SSO1916
AE006641	P	1736516	SSO1916
AE006641	P	1736517	SSO1916
AE006641	P	1746816	SSO1924
AE006641	P	1746817	SSO1924
AE006641	P	1746818	SSO1924
AE006641	P	1746819	SSO1924
AE006641	P	1756749	SSO1937
AE006641	P	1756750	SSO1937
AE006641	P	1756751	SSO1937
AE006641	P	1763028	SSO1943
AE006641	P	1763029	SSO1943
AE006641	P	1763030	SSO1943
AE006641	P	1763031	SSO1943
AE006641	P	1763049	SSO1943
AE006641	P	1763050	SSO1943
AE006641	P	1763051	SSO1943
AE006641	P	1782312	SSO1967
AE006641	P	1782313	SSO1967
AE006641	P	1786231	SSO1972
AE006641	P	1786232	SSO1972
AE006641	P	1786233	SSO1972
AE006641	P	1786234	SSO1972
AE006641	P	1792358	SSO9407
AE006641	P	1792359	SSO9407
AE006641	P	1792360	SSO9407
AE006641	P	1792361	SSO9407
AE006641	P	1950721	SSO2125
AE006641	P	1950722	SSO2125
AE006641	P	1950767	SSO2125
AE006641	P	1950768	SSO2125
AE006641	P	1950769	SSO2125
AE006641	P	1950770	SSO2125
AE006641	P	1950776	SSO2125
AE006641	P	1950777	SSO2125
AE006641	P	1950778	SSO2125
AE006641	P	2018822	SSO2195
AE006641	P	2018823	SSO2195
AE006641	P	2018824	SSO2195
AE006641	P	2018826	SSO2195
AE006641	P	2057539	SSO10075
AE006641	P	2093386	SSO2283
AE006641	P	2093387	SSO2283
AE006641	P	2116366	SSO2312
AE006641	P	2116367	SSO2312
AE006641	P	2116368	SSO2312
AE006641	P	2116369	SSO2312
AE006641	P	2116372	SSO2312
AE006641	P	2116373	SSO2312
AE006641	P	2122596	SSO2320
AE006641	P	2122597	SSO2320
AE006641	P	2122598	SSO2320
AE006641	P	2137219	SSO2338
AE006641	P	2137220	SSO2338
AE006641	P	2137222	SSO2338
AE006641	P	2137223	SSO2338
AE006641	P	2137224	SSO2338
AE006641	P	2137225	SSO2338
AE006641	P	2141535	SSO2345
AE006641	P	2141536	SSO2345
AE006641	P	2141537	SSO2345
AE006641	P	2141538	SSO2345
AE006641	P	2141539	SSO2345
AE006641	P	2142421	SSO2346
AE006641	P	2142422	SSO2346
AE006641	P	2142423	SSO2346
AE006641	P	2142424	SSO2346
AE006641	P	2142425	SSO2346
AE006641	P	2146631	SSO2352
AE006641	P	2146632	SSO2352
AE006641	P	2278181	SSO2509
AE006641	P	2312911	SSO2542
AE006641	P	2312912	SSO2542
AE006641	P	2333932	SSO2559
AE006641	P	2333933	SSO2559
AE006641	P	2392149	SSO10784
AE006641	P	2637898	SSO2883
AE006641	P	2637899	SSO2883
AE006641	P	2637900	SSO2883
AE006641	P	2642774	SSO2889
AE006641	P	2642775	SSO2889
AE006641	P	2642776	SSO2889
AE006641	P	2642777	SSO2889
AE006641	P	2642778	SSO2889
AE006641	P	2642779	SSO2889
AE006641	P	2642780	SSO2889
AE006641	P	2696114	SSO2950
AE006641	P	2696115	SSO2950
AE006641	P	2832944	SSO11909
AE006641	P	2832945	SSO11909
AE006641	P	2832946	SSO11909
AE006641	P	2832949	SSO11909
AE006641	P	2832968	SSO11909
AE006641	P	2832969	SSO11909
AE006641	P	2832970	SSO11909
AE006641	P	2832971	SSO11909
AE006641	P	2832972	SSO11909
AE006641	P	2832975	SSO11909
AE006641	P	2832976	SSO11909
AE006641	P	2952814	SSO3206
AE006641	P	2952843	SSO3206
AE006641	P	2952844	SSO3206
AE006641	P	2952845	SSO3206
AE006641	M	59326	SSO0074
AE006641	M	59327	SSO0074
AE006641	M	79457	SSO0098
AE006641	M	181746	SSO0212
AE006641	M	215560	SSO0249
AE006641	M	225174	SSO0259
AE006641	M	225175	SSO0259
AE006641	M	225176	SSO0259
AE006641	M	225177	SSO0259
AE006641	M	225178	SSO0259
AE006641	M	225179	SSO0259
AE006641	M	225204	SSO0259
AE006641	M	225205	SSO0259
AE006641	M	225206	SSO0259
AE006641	M	225207	SSO0259
AE006641	M	225208	SSO0259
AE006641	M	225209	SSO0259
AE006641	M	229998	SSO0269
AE006641	M	230000	SSO0269
AE006641	M	230002	SSO0269
AE006641	M	230013	SSO0269
AE006641	M	230014	SSO0269
AE006641	M	230037	SSO0269
AE006641	M	268347	SSO0315
AE006641	M	288456	SSO0335
AE006641	M	288457	SSO0335
AE006641	M	303829	SSO0358
AE006641	M	303830	SSO0358
AE006641	M	343220	SSO5761
AE006641	M	343221	SSO5761
AE006641	M	362345	SSO0417
AE006641	M	362346	SSO0417
AE006641	M	362347	SSO0417
AE006641	M	362354	SSO0417
AE006641	M	377545	SSO5844
AE006641	M	377546	SSO5844
AE006641	M	377547	SSO5844
AE006641	M	377548	SSO5844
AE006641	M	377551	SSO5844
AE006641	M	385730	SSO0446
AE006641	M	385731	SSO0446
AE006641	M	397065	SSO0463
AE006641	M	397066	SSO0463
AE006641	M	513767	SSO0585
AE006641	M	513772	SSO0585
AE006641	M	513773	SSO0585
AE006641	M	513774	SSO0585
AE006641	M	513775	SSO0585
AE006641	M	513776	SSO0585
AE006641	M	513777	SSO0585
AE006641	M	513779	SSO0585
AE006641	M	513780	SSO0585
AE006641	M	513781	SSO0585
AE006641	M	513782	SSO0585
AE006641	M	530616	SSO0607
AE006641	M	530617	SSO0607
AE006641	M	530618	SSO0607
AE006641	M	530623	SSO0607
AE006641	M	530624	SSO0607
AE006641	M	562164	SSO0649
AE006641	M	597785	SSO0692
AE006641	M	597793	SSO0692
AE006641	M	597794	SSO0692
AE006641	M	628699	SSO0739
AE006641	M	628700	SSO0739
AE006641	M	628701	SSO0739
AE006641	M	628702	SSO0739
AE006641	M	628703	SSO0739
AE006641	M	628704	SSO0739
AE006641	M	628705	SSO0739
AE006641	M	628706	SSO0739
AE006641	M	628707	SSO0739
AE006641	M	628708	SSO0739
AE006641	M	628709	SSO0739
AE006641	M	646826	SSO6468
AE006641	M	646827	SSO6468
AE006641	M	646828	SSO6468
AE006641	M	646829	SSO6468
AE006641	M	646831	SSO6468
AE006641	M	657223	SSO0773
AE006641	M	657225	SSO0773
AE006641	M	657226	SSO0773
AE006641	M	716464	SSO0836
AE006641	M	716465	SSO0836
AE006641	M	754602	SSO0886
AE006641	M	794167	SSO0936
AE006641	M	794169	SSO0936
AE006641	M	794170	SSO0936
AE006641	M	794171	SSO0936
AE006641	M	794172	SSO0936
AE006641	M	794194	SSO0936
AE006641	M	794196	SSO0936
AE006641	M	794197	SSO0936
AE006641	M	794198	SSO0936
AE006641	M	794199	SSO0936
AE006641	M	794200	SSO0936
AE006641	M	794201	SSO0936
AE006641	M	794202	SSO0936
AE006641	M	820912	SSO0965
AE006641	M	837025	SSO0978
AE006641	M	837030	SSO0978
AE006641	M	837035	SSO0978
AE006641	M	919048	SSO1060
AE006641	M	929352	SSO1072
AE006641	M	929359	SSO1072
AE006641	M	1003798	SSO1163
AE006641	M	1003799	SSO1163
AE006641	M	1003800	SSO1163
AE006641	M	1003801	SSO1163
AE006641	M	1003802	SSO1163
AE006641	M	1288525	SSO1436
AE006641	M	1288526	SSO1436
AE006641	M	1337552	SSO1480
AE006641	M	1337553	SSO1480
AE006641	M	1337563	SSO1480
AE006641	M	1337578	SSO1480
AE006641	M	1337579	SSO1480
AE006641	M	1337582	SSO1480
AE006641	M	1337585	SSO1480
AE006641	M	1337601	SSO1480
AE006641	M	1337602	SSO1480
AE006641	M	1337603	SSO1480
AE006641	M	1337604	SSO1480
AE006641	M	1337607	SSO1480
AE006641	M	1352509	SSO1500
AE006641	M	1352510	SSO1500
AE006641	M	1362901	SSO1509
AE006641	M	1362902	SSO1509
AE006641	M	1362903	SSO1509
AE006641	M	1362904	SSO1509
AE006641	M	1362905	SSO1509
AE006641	M	1362906	SSO1509
AE006641	M	1395955	SSO1545
AE006641	M	1395959	SSO1545
AE006641	M	1449360	SSO8459
AE006641	M	1449364	SSO8459
AE006641	M	1493888	SSO1640
AE006641	M	1493889	SSO1640
AE006641	M	1493891	SSO1640
AE006641	M	1570537	SSO1731
AE006641	M	1570542	SSO1731
AE006641	M	1570543	SSO1731
AE006641	M	1570546	SSO1731
AE006641	M	1570547	SSO1731
AE006641	M	1570548	SSO1731
AE006641	M	1592404	SSO1758
AE006641	M	1592405	SSO1758
AE006641	M	1592406	SSO1758
AE006641	M	1592407	SSO1758
AE006641	M	1592418	SSO1758
AE006641	M	1592422	SSO1758
AE006641	M	1592423	SSO1758
AE006641	M	1625106	SSO1791
AE006641	M	1630281	SSO8938
AE006641	M	1660601	SSO1832
AE006641	M	1660602	SSO1832
AE006641	M	1660603	SSO1832
AE006641	M	1660604	SSO1832
AE006641	M	1660605	SSO1832
AE006641	M	1663094	SSO9043
AE006641	M	1663095	SSO9043
AE006641	M	1663096	SSO9043
AE006641	M	1663097	SSO9043
AE006641	M	1746783	SSO9268
AE006641	M	1746784	SSO9268
AE006641	M	1746816	SSO9268
AE006641	M	1746817	SSO9268
AE006641	M	1746819	SSO9268
AE006641	M	1769282	SSO1951
AE006641	M	1779681	SSO1966
AE006641	M	1786234	SSO1974
AE006641	M	1786294	SSO1974
AE006641	M	1786299	SSO1974
AE006641	M	1786300	SSO1974
AE006641	M	1786301	SSO1974
AE006641	M	1821914	SSO2005
AE006641	M	1821915	SSO2005
AE006641	M	2018825	SSO2197
AE006641	M	2018826	SSO2197
AE006641	M	2142430	SSO2347
AE006641	M	2154615	SSO2360
AE006641	M	2154616	SSO2360
AE006641	M	2154617	SSO2360
AE006641	M	2154663	SSO2360
AE006641	M	2154664	SSO2360
AE006641	M	2154665	SSO2360
AE006641	M	2154666	SSO2360
AE006641	M	2212958	SSO2437
AE006641	M	2254344	SSO2483
AE006641	M	2254345	SSO2483
AE006641	M	2254348	SSO2483
AE006641	M	2254349	SSO2483
AE006641	M	2475298	SSO2722
AE006641	M	2475300	SSO2722
AE006641	M	2486495	SSO2732
AE006641	M	2557111	SSO2796
AE006641	M	2557112	SSO2796
AE006641	M	2557113	SSO2796
AE006641	M	2557114	SSO2796
AE006641	M	2557115	SSO2796
AE006641	M	2568149	SSO2807
AE006641	M	2568151	SSO2807
AE006641	M	2568155	SSO2807
AE006641	M	2568158	SSO2807
AE006641	M	2568159	SSO2807
AE006641	M	2568160	SSO2807
AE006641	M	2568161	SSO2807
AE006641	M	2613801	SSO2855
AE006641	M	2774102	SSO3027
AE006641	M	2774103	SSO3027
AE006641	M	2774104	SSO3027
AE006641	M	2774105	SSO3027
AE006641	M	2774106	SSO3027
AE006641	M	2900247	SSO3148
AE008384	P	71887	MM_0054
AE008384	P	152237	MM_0121
AE008384	P	205381	MM_0157
AE008384	P	205382	MM_0157
AE008384	P	205383	MM_0157
AE008384	P	205384	MM_0157
AE008384	P	205385	MM_0157
AE008384	P	205386	MM_0157
AE008384	P	205387	MM_0157
AE008384	P	205391	MM_0157
AE008384	P	205420	MM_0157
AE008384	P	206029	MM_0158
AE008384	P	238785	MM_0174
AE008384	P	344533	MM_0258
AE008384	P	402835	MM_0300
AE008384	P	470452	MM_0363
AE008384	P	471548	MM_0365
AE008384	P	471549	MM_0365
AE008384	P	536972	MM_0422
AE008384	P	536987	MM_0422
AE008384	P	536989	MM_0422
AE008384	P	536991	MM_0422
AE008384	P	536992	MM_0422
AE008384	P	537004	MM_0422
AE008384	P	549107	MM_0430
AE008384	P	650237	MM_0521
AE008384	P	650238	MM_0521
AE008384	P	650240	MM_0521
AE008384	P	650241	MM_0521
AE008384	P	650246	MM_0521
AE008384	P	729142	MM_0599
AE008384	P	729152	MM_0599
AE008384	P	729153	MM_0599
AE008384	P	729364	MM_0600
AE008384	P	766267	MM_0637
AE008384	P	824360	MM_0686
AE008384	P	826771	MM_0688
AE008384	P	826772	MM_0688
AE008384	P	826773	MM_0688
AE008384	P	905323	MM_0755
AE008384	P	905324	MM_0755
AE008384	P	905325	MM_0755
AE008384	P	905693	MM_0756
AE008384	P	905694	MM_0756
AE008384	P	905727	MM_0756
AE008384	P	905728	MM_0756
AE008384	P	905729	MM_0756
AE008384	P	954844	MM_0800
AE008384	P	956101	MM_0801
AE008384	P	956102	MM_0801
AE008384	P	956107	MM_0801
AE008384	P	956108	MM_0801
AE008384	P	956109	MM_0801
AE008384	P	956110	MM_0801
AE008384	P	956111	MM_0801
AE008384	P	956112	MM_0801
AE008384	P	956113	MM_0801
AE008384	P	956115	MM_0801
AE008384	P	956117	MM_0801
AE008384	P	956119	MM_0801
AE008384	P	956120	MM_0801
AE008384	P	956121	MM_0801
AE008384	P	956122	MM_0801
AE008384	P	956998	MM_0802
AE008384	P	957381	MM_0803
AE008384	P	957382	MM_0803
AE008384	P	960061	MM_0809
AE008384	P	960062	MM_0809
AE008384	P	960063	MM_0809
AE008384	P	960064	MM_0809
AE008384	P	960065	MM_0809
AE008384	P	960066	MM_0809
AE008384	P	1036999	MM_0878
AE008384	P	1037000	MM_0878
AE008384	P	1037001	MM_0878
AE008384	P	1037002	MM_0878
AE008384	P	1037003	MM_0878
AE008384	P	1037004	MM_0878
AE008384	P	1037005	MM_0878
AE008384	P	1037006	MM_0878
AE008384	P	1037050	MM_0878
AE008384	P	1037051	MM_0878
AE008384	P	1037052	MM_0878
AE008384	P	1037053	MM_0878
AE008384	P	1037054	MM_0878
AE008384	P	1037059	MM_0878
AE008384	P	1037060	MM_0878
AE008384	P	1037061	MM_0878
AE008384	P	1071291	MM_0905
AE008384	P	1187469	MM_1013
AE008384	P	1187470	MM_1013
AE008384	P	1195690	MM_1023
AE008384	P	1195691	MM_1023
AE008384	P	1263028	MM_1073
AE008384	P	1263029	MM_1073
AE008384	P	1263030	MM_1073
AE008384	P	1271846	MM_1079
AE008384	P	1271848	MM_1079
AE008384	P	1271849	MM_1079
AE008384	P	1288654	MM_1094
AE008384	P	1288662	MM_1094
AE008384	P	1296417	MM_1102
AE008384	P	1296453	MM_1102
AE008384	P	1453510	MM_1226
AE008384	P	1453511	MM_1226
AE008384	P	1453512	MM_1226
AE008384	P	1453513	MM_1226
AE008384	P	1461896	MM_1234
AE008384	P	1592561	MM_1334
AE008384	P	1592588	MM_1334
AE008384	P	1592590	MM_1334
AE008384	P	1592591	MM_1334
AE008384	P	1592592	MM_1334
AE008384	P	1592593	MM_1334
AE008384	P	1592594	MM_1334
AE008384	P	1592595	MM_1334
AE008384	P	1592596	MM_1334
AE008384	P	1794319	MM_1504
AE008384	P	1794320	MM_1504
AE008384	P	1794900	MM_1505
AE008384	P	1794901	MM_1505
AE008384	P	1900869	MM_1596
AE008384	P	1913716	MM_1602
AE008384	P	1913717	MM_1602
AE008384	P	1927518	MM_1615
AE008384	P	1927519	MM_1615
AE008384	P	1927545	MM_1615
AE008384	P	2032386	MM_1688
AE008384	P	2032387	MM_1688
AE008384	P	2032395	MM_1688
AE008384	P	2032396	MM_1688
AE008384	P	2032398	MM_1688
AE008384	P	2032399	MM_1688
AE008384	P	2032404	MM_1688
AE008384	P	2032405	MM_1688
AE008384	P	2032406	MM_1688
AE008384	P	2032408	MM_1688
AE008384	P	2035396	MM_1692
AE008384	P	2035397	MM_1692
AE008384	P	2035398	MM_1692
AE008384	P	2035400	MM_1692
AE008384	P	2036684	MM_1693
AE008384	P	2036689	MM_1693
AE008384	P	2036690	MM_1693
AE008384	P	2036703	MM_1693
AE008384	P	2036704	MM_1693
AE008384	P	2062941	MM_1717
AE008384	P	2062942	MM_1717
AE008384	P	2062943	MM_1717
AE008384	P	2063713	MM_1718
AE008384	P	2063714	MM_1718
AE008384	P	2063715	MM_1718
AE008384	P	2063730	MM_1718
AE008384	P	2063731	MM_1718
AE008384	P	2083149	MM_1741
AE008384	P	2100054	MM_1759
AE008384	P	2100055	MM_1759
AE008384	P	2100056	MM_1759
AE008384	P	2100057	MM_1759
AE008384	P	2100058	MM_1759
AE008384	P	2100059	MM_1759
AE008384	P	2165962	MM_1815
AE008384	P	2175205	MM_1824
AE008384	P	2175206	MM_1824
AE008384	P	2349876	MM_1976
AE008384	P	2349877	MM_1976
AE008384	P	2394678	MM_2007
AE008384	P	2394679	MM_2007
AE008384	P	2398175	MM_2011
AE008384	P	2398176	MM_2011
AE008384	P	2543598	MM_2132
AE008384	P	2548456	MM_2143
AE008384	P	2548457	MM_2143
AE008384	P	2548458	MM_2143
AE008384	P	2550025	MM_2146
AE008384	P	2550027	MM_2146
AE008384	P	2550028	MM_2146
AE008384	P	2550029	MM_2146
AE008384	P	2550035	MM_2146
AE008384	P	2558358	MM_2155
AE008384	P	2559029	MM_2156
AE008384	P	2612657	MM_2198
AE008384	P	2612658	MM_2198
AE008384	P	2612676	MM_2198
AE008384	P	2612684	MM_2198
AE008384	P	2612685	MM_2198
AE008384	P	2612686	MM_2198
AE008384	P	2612687	MM_2198
AE008384	P	2612688	MM_2198
AE008384	P	2612689	MM_2198
AE008384	P	2612692	MM_2198
AE008384	P	2612695	MM_2198
AE008384	P	2677056	MM_2248
AE008384	P	2677058	MM_2248
AE008384	P	2727357	MM_2287
AE008384	P	2727358	MM_2287
AE008384	P	2727359	MM_2287
AE008384	P	2814314	MM_2355
AE008384	P	2842299	MM_2384
AE008384	P	2842300	MM_2384
AE008384	P	2874344	MM_2413
AE008384	P	2874345	MM_2413
AE008384	P	2874346	MM_2413
AE008384	P	2874347	MM_2413
AE008384	P	2874348	MM_2413
AE008384	P	2874349	MM_2413
AE008384	P	2874366	MM_2413
AE008384	P	2874370	MM_2413
AE008384	P	2874371	MM_2413
AE008384	P	2874374	MM_2413
AE008384	P	2874375	MM_2413
AE008384	P	2874376	MM_2413
AE008384	P	2883114	MM_2419
AE008384	P	2883122	MM_2419
AE008384	P	2883123	MM_2419
AE008384	P	2883124	MM_2419
AE008384	P	2883125	MM_2419
AE008384	P	2883126	MM_2419
AE008384	P	2991198	MM_2507
AE008384	P	3038393	MM_2553
AE008384	P	3038394	MM_2553
AE008384	P	3038395	MM_2553
AE008384	P	3038396	MM_2553
AE008384	P	3038399	MM_2553
AE008384	P	3038400	MM_2553
AE008384	P	3038401	MM_2553
AE008384	P	3038403	MM_2553
AE008384	P	3038438	MM_2553
AE008384	P	3038441	MM_2553
AE008384	P	3038442	MM_2553
AE008384	P	3038445	MM_2553
AE008384	P	3038446	MM_2553
AE008384	P	3038452	MM_2553
AE008384	P	3038453	MM_2553
AE008384	P	3038454	MM_2553
AE008384	P	3038455	MM_2553
AE008384	P	3038456	MM_2553
AE008384	P	3038457	MM_2553
AE008384	P	3038458	MM_2553
AE008384	P	3038459	MM_2553
AE008384	P	3038460	MM_2553
AE008384	P	3125296	MM_2622
AE008384	P	3125297	MM_2622
AE008384	P	3125298	MM_2622
AE008384	P	3125299	MM_2622
AE008384	P	3125306	MM_2622
AE008384	P	3128053	MM_2625
AE008384	P	3128192	MM_2626
AE008384	P	3206785	MM_2682
AE008384	P	3206786	MM_2682
AE008384	P	3206787	MM_2682
AE008384	P	3206788	MM_2682
AE008384	P	3206789	MM_2682
AE008384	P	3206790	MM_2682
AE008384	P	3208671	MM_2683
AE008384	P	3208712	MM_2683
AE008384	P	3208714	MM_2683
AE008384	P	3208717	MM_2683
AE008384	P	3221140	MM_2694
AE008384	P	3221141	MM_2694
AE008384	P	3221142	MM_2694
AE008384	P	3221143	MM_2694
AE008384	P	3221144	MM_2694
AE008384	P	3221145	MM_2694
AE008384	P	3222138	MM_2695
AE008384	P	3222139	MM_2695
AE008384	P	3222155	MM_2695
AE008384	P	3222158	MM_2695
AE008384	P	3222159	MM_2695
AE008384	P	3223775	MM_2698
AE008384	P	3236679	MM_2706
AE008384	P	3236680	MM_2706
AE008384	P	3369231	MM_2806
AE008384	P	3369232	MM_2806
AE008384	P	3369233	MM_2806
AE008384	P	3369234	MM_2806
AE008384	P	3369235	MM_2806
AE008384	P	3394352	MM_2829
AE008384	P	3394353	MM_2829
AE008384	P	3402603	MM_2836
AE008384	P	3402632	MM_2836
AE008384	P	3402633	MM_2836
AE008384	P	3575185	MM_2962
AE008384	P	3575190	MM_2962
AE008384	P	3575191	MM_2962
AE008384	P	3575204	MM_2962
AE008384	P	3575205	MM_2962
AE008384	P	3780249	MM_3109
AE008384	P	3780250	MM_3109
AE008384	P	3780251	MM_3109
AE008384	P	3780252	MM_3109
AE008384	P	3780253	MM_3109
AE008384	P	3789949	MM_3117
AE008384	P	3789950	MM_3117
AE008384	P	3789951	MM_3117
AE008384	P	3867033	MM_3180
AE008384	P	3867034	MM_3180
AE008384	P	3867035	MM_3180
AE008384	P	3867036	MM_3180
AE008384	P	3867037	MM_3180
AE008384	P	3867039	MM_3180
AE008384	P	3868592	MM_3182
AE008384	P	3868593	MM_3182
AE008384	P	3952044	MM_3251
AE008384	P	3952045	MM_3251
AE008384	P	3994049	MM_3283
AE008384	P	4031385	MM_3308
AE008384	P	4031386	MM_3308
AE008384	P	4090137	MM_3361
AE008384	P	4090995	MM_3362
AE008384	M	70649	MM_0053
AE008384	M	70654	MM_0053
AE008384	M	70655	MM_0053
AE008384	M	70657	MM_0053
AE008384	M	70658	MM_0053
AE008384	M	99320	MM_0074
AE008384	M	264337	MM_0191
AE008384	M	264344	MM_0191
AE008384	M	264355	MM_0191
AE008384	M	264361	MM_0191
AE008384	M	264363	MM_0191
AE008384	M	327674	MM_0246
AE008384	M	327675	MM_0246
AE008384	M	327676	MM_0246
AE008384	M	413662	MM_0310
AE008384	M	413663	MM_0310
AE008384	M	427888	MM_0321
AE008384	M	427889	MM_0321
AE008384	M	438096	MM_0333
AE008384	M	510597	MM_0398
AE008384	M	513519	MM_0401
AE008384	M	513544	MM_0401
AE008384	M	513547	MM_0401
AE008384	M	513548	MM_0401
AE008384	M	513549	MM_0401
AE008384	M	513550	MM_0401
AE008384	M	535349	MM_0421
AE008384	M	535382	MM_0421
AE008384	M	535384	MM_0421
AE008384	M	535387	MM_0421
AE008384	M	535388	MM_0421
AE008384	M	535390	MM_0421
AE008384	M	535391	MM_0421
AE008384	M	535392	MM_0421
AE008384	M	535393	MM_0421
AE008384	M	535394	MM_0421
AE008384	M	535395	MM_0421
AE008384	M	535396	MM_0421
AE008384	M	535397	MM_0421
AE008384	M	535398	MM_0421
AE008384	M	535402	MM_0421
AE008384	M	535403	MM_0421
AE008384	M	535404	MM_0421
AE008384	M	535405	MM_0421
AE008384	M	632862	MM_0509
AE008384	M	632868	MM_0509
AE008384	M	632870	MM_0509
AE008384	M	682610	MM_0557
AE008384	M	682614	MM_0557
AE008384	M	682616	MM_0557
AE008384	M	682619	MM_0557
AE008384	M	682620	MM_0557
AE008384	M	685284	MM_0561
AE008384	M	704428	MM_0578
AE008384	M	720301	MM_0590
AE008384	M	758783	MM_0628
AE008384	M	758784	MM_0628
AE008384	M	758785	MM_0628
AE008384	M	758786	MM_0628
AE008384	M	758787	MM_0628
AE008384	M	804986	MM_0671
AE008384	M	804987	MM_0671
AE008384	M	804988	MM_0671
AE008384	M	804989	MM_0671
AE008384	M	804990	MM_0671
AE008384	M	890315	MM_0744
AE008384	M	890316	MM_0744
AE008384	M	914158	MM_0766
AE008384	M	914159	MM_0766
AE008384	M	914160	MM_0766
AE008384	M	914161	MM_0766
AE008384	M	1029408	MM_0871
AE008384	M	1029409	MM_0871
AE008384	M	1029410	MM_0871
AE008384	M	1029412	MM_0871
AE008384	M	1030473	MM_0872
AE008384	M	1030474	MM_0872
AE008384	M	1091905	MM_0926
AE008384	M	1091911	MM_0926
AE008384	M	1091917	MM_0926
AE008384	M	1091919	MM_0926
AE008384	M	1115076	MM_0941
AE008384	M	1115077	MM_0941
AE008384	M	1115078	MM_0941
AE008384	M	1206863	MM_1032
AE008384	M	1300803	MM_1107
AE008384	M	1300804	MM_1107
AE008384	M	1300808	MM_1107
AE008384	M	1300814	MM_1107
AE008384	M	1300815	MM_1107
AE008384	M	1300822	MM_1107
AE008384	M	1300823	MM_1107
AE008384	M	1416793	MM_1192
AE008384	M	1436172	MM_1214
AE008384	M	1481667	MM_1250
AE008384	M	1481668	MM_1250
AE008384	M	1481669	MM_1250
AE008384	M	1481670	MM_1250
AE008384	M	1546199	MM_1300
AE008384	M	1546205	MM_1300
AE008384	M	1546207	MM_1300
AE008384	M	1681949	MM_1398
AE008384	M	1705222	MM_1423
AE008384	M	1705224	MM_1423
AE008384	M	1705225	MM_1423
AE008384	M	1705226	MM_1423
AE008384	M	1712314	MM_1430
AE008384	M	1712315	MM_1430
AE008384	M	1712317	MM_1430
AE008384	M	1712318	MM_1430
AE008384	M	1712319	MM_1430
AE008384	M	1712341	MM_1430
AE008384	M	1712342	MM_1430
AE008384	M	1712343	MM_1430
AE008384	M	1713972	MM_1432
AE008384	M	1713983	MM_1432
AE008384	M	1713985	MM_1432
AE008384	M	1713986	MM_1432
AE008384	M	1717221	MM_1436
AE008384	M	1717222	MM_1436
AE008384	M	1717223	MM_1436
AE008384	M	1717229	MM_1436
AE008384	M	1718028	MM_1437
AE008384	M	1718047	MM_1437
AE008384	M	1794901	MM_1506
AE008384	M	1811102	MM_1519
AE008384	M	1811103	MM_1519
AE008384	M	1811105	MM_1519
AE008384	M	1811111	MM_1519
AE008384	M	1811163	MM_1519
AE008384	M	1811164	MM_1519
AE008384	M	1819396	MM_1526
AE008384	M	1819397	MM_1526
AE008384	M	1819398	MM_1526
AE008384	M	1819399	MM_1526
AE008384	M	1819400	MM_1526
AE008384	M	1819401	MM_1526
AE008384	M	1841227	MM_1542
AE008384	M	1841228	MM_1542
AE008384	M	1841229	MM_1542
AE008384	M	1841230	MM_1542
AE008384	M	1841232	MM_1542
AE008384	M	1941026	MM_1628
AE008384	M	2119723	MM_1776
AE008384	M	2119726	MM_1776
AE008384	M	2186441	MM_1836
AE008384	M	2186442	MM_1836
AE008384	M	2238451	MM_1885
AE008384	M	2238452	MM_1885
AE008384	M	2242192	MM_1888
AE008384	M	2242198	MM_1888
AE008384	M	2242200	MM_1888
AE008384	M	2439099	MM_2042
AE008384	M	2439100	MM_2042
AE008384	M	2439101	MM_2042
AE008384	M	2442002	MM_2045
AE008384	M	2442003	MM_2045
AE008384	M	2442004	MM_2045
AE008384	M	2442005	MM_2045
AE008384	M	2444609	MM_2049
AE008384	M	2444610	MM_2049
AE008384	M	2444611	MM_2049
AE008384	M	2444616	MM_2049
AE008384	M	2444617	MM_2049
AE008384	M	2444619	MM_2049
AE008384	M	2444620	MM_2049
AE008384	M	2444628	MM_2049
AE008384	M	2444629	MM_2049
AE008384	M	2444642	MM_2049
AE008384	M	2444644	MM_2049
AE008384	M	2444645	MM_2049
AE008384	M	2446603	MM_2051
AE008384	M	2446604	MM_2051
AE008384	M	2446609	MM_2051
AE008384	M	2500790	MM_2095
AE008384	M	2855675	MM_2394
AE008384	M	2855676	MM_2394
AE008384	M	2855678	MM_2394
AE008384	M	2855689	MM_2394
AE008384	M	2869752	MM_2408
AE008384	M	2869783	MM_2408
AE008384	M	2869796	MM_2408
AE008384	M	2869801	MM_2408
AE008384	M	2943987	MM_2470
AE008384	M	2943988	MM_2470
AE008384	M	2959383	MM_2480
AE008384	M	2959384	MM_2480
AE008384	M	2959385	MM_2480
AE008384	M	3069975	MM_2580
AE008384	M	3069980	MM_2580
AE008384	M	3069981	MM_2580
AE008384	M	3069983	MM_2580
AE008384	M	3069984	MM_2580
AE008384	M	3222132	MM_2696
AE008384	M	3222133	MM_2696
AE008384	M	3222135	MM_2696
AE008384	M	3222138	MM_2696
AE008384	M	3222146	MM_2696
AE008384	M	3222147	MM_2696
AE008384	M	3222148	MM_2696
AE008384	M	3222159	MM_2696
AE008384	M	3222160	MM_2696
AE008384	M	3222161	MM_2696
AE008384	M	3222162	MM_2696
AE008384	M	3222164	MM_2696
AE008384	M	3222423	MM_2697
AE008384	M	3222424	MM_2697
AE008384	M	3222425	MM_2697
AE008384	M	3222426	MM_2697
AE008384	M	3222427	MM_2697
AE008384	M	3222428	MM_2697
AE008384	M	3384613	MM_2821
AE008384	M	3384616	MM_2821
AE008384	M	3404071	MM_2838
AE008384	M	3404076	MM_2838
AE008384	M	3404077	MM_2838
AE008384	M	3404079	MM_2838
AE008384	M	3404080	MM_2838
AE008384	M	3477874	MM_2896
AE008384	M	3477875	MM_2896
AE008384	M	3477876	MM_2896
AE008384	M	3477877	MM_2896
AE008384	M	3621326	MM_2997
AE008384	M	3663987	MM_3027
AE008384	M	3663989	MM_3027
AE008384	M	3663990	MM_3027
AE008384	M	3663991	MM_3027
AE008384	M	3663992	MM_3027
AE008384	M	3663993	MM_3027
AE008384	M	3663994	MM_3027
AE008384	M	3663996	MM_3027
AE008384	M	3663997	MM_3027
AE008384	M	3663998	MM_3027
AE008384	M	3682710	MM_3042
AE008384	M	3682711	MM_3042
AE008384	M	3682712	MM_3042
AE008384	M	3682713	MM_3042
AE008384	M	3682714	MM_3042
AE008384	M	3682718	MM_3042
AE008384	M	3682719	MM_3042
AE008384	M	3853418	MM_3169
AE008384	M	3853419	MM_3169
AE008384	M	3853420	MM_3169
AE008384	M	3853421	MM_3169
AE008384	M	3853422	MM_3169
AE008384	M	3853426	MM_3169
AE008384	M	3853431	MM_3169
AE008384	M	3853432	MM_3169
AE008384	M	3853433	MM_3169
AE008384	M	4048346	MM_3323
AE008384	M	4049393	MM_3324
AE008384	M	4094709	MM_3370
AE009439	P	783159	MK0823
AE009439	P	783160	MK0823
AE009439	P	783167	MK0823
AE009439	P	802627	MK0843
AE009439	P	1495892	MK1471
AE009439	P	1495893	MK1471
AE009439	P	1495894	MK1471
AE009439	P	1537969	MK1526
AE009439	M	172807	MK0178
AE009439	M	172808	MK0178
AE009439	M	172809	MK0178
AE009439	M	172810	MK0178
AE009439	M	172811	MK0178
AE009439	M	172812	MK0178
AE009439	M	172813	MK0178
AE009439	M	800125	MK0840
AE009441	P	74191	PAE0129
AE009441	P	89484	PAE0171
AE009441	P	89485	PAE0171
AE009441	P	89486	PAE0171
AE009441	P	89489	PAE0171
AE009441	P	89490	PAE0171
AE009441	P	93530	PAE0178
AE009441	P	221052	PAE0396
AE009441	P	266260	PAE0485
AE009441	P	266261	PAE0485
AE009441	P	266262	PAE0485
AE009441	P	266281	PAE0485
AE009441	P	266282	PAE0485
AE009441	P	266283	PAE0485
AE009441	P	266284	PAE0485
AE009441	P	266285	PAE0485
AE009441	P	266575	PAE0486
AE009441	P	266576	PAE0486
AE009441	P	286298	PAE0538
AE009441	P	286301	PAE0538
AE009441	P	286302	PAE0538
AE009441	P	305865	PAE0566
AE009441	P	349298	PAE0651
AE009441	P	349299	PAE0651
AE009441	P	368825	PAE0671
AE009441	P	370415	PAE0675a
AE009441	P	406732	PAE0732
AE009441	P	410060	PAE0736
AE009441	P	439775	PAE0790
AE009441	P	439776	PAE0790
AE009441	P	550150	PAE0945
AE009441	P	587225	PAE1000
AE009441	P	587226	PAE1000
AE009441	P	587227	PAE1000
AE009441	P	587228	PAE1000
AE009441	P	633659	PAE1078
AE009441	P	633661	PAE1078
AE009441	P	633662	PAE1078
AE009441	P	636056	PAE1079
AE009441	P	636057	PAE1079
AE009441	P	636058	PAE1079
AE009441	P	636059	PAE1079
AE009441	P	636066	PAE1079
AE009441	P	679548	PAE1158
AE009441	P	724030	PAE1232
AE009441	P	730757	PAE1251
AE009441	P	730758	PAE1251
AE009441	P	730759	PAE1251
AE009441	P	731942	PAE1252
AE009441	P	789485	PAE1329
AE009441	P	804725	PAE1355
AE009441	P	837573	PAE1399
AE009441	P	837575	PAE1399
AE009441	P	838279	PAE1403
AE009441	P	838293	PAE1403
AE009441	P	838294	PAE1403
AE009441	P	872074	PAE1484
AE009441	P	872093	PAE1484
AE009441	P	882762	PAE1509
AE009441	P	888840	PAE1519
AE009441	P	888841	PAE1519
AE009441	P	890710	PAE1523
AE009441	P	890711	PAE1523
AE009441	P	901910	PAE1545
AE009441	P	901911	PAE1545
AE009441	P	901912	PAE1545
AE009441	P	1023496	PAE1748
AE009441	P	1023497	PAE1748
AE009441	P	1023498	PAE1748
AE009441	P	1023501	PAE1748
AE009441	P	1023502	PAE1748
AE009441	P	1023503	PAE1748
AE009441	P	1023504	PAE1748
AE009441	P	1023505	PAE1748
AE009441	P	1023506	PAE1748
AE009441	P	1043808	PAE1774
AE009441	P	1043811	PAE1774
AE009441	P	1043816	PAE1774
AE009441	P	1090723	PAE1850
AE009441	P	1090724	PAE1850
AE009441	P	1090725	PAE1850
AE009441	P	1090727	PAE1850
AE009441	P	1090728	PAE1850
AE009441	P	1090729	PAE1850
AE009441	P	1090738	PAE1850
AE009441	P	1090743	PAE1850
AE009441	P	1090747	PAE1850
AE009441	P	1090750	PAE1850
AE009441	P	1090752	PAE1850
AE009441	P	1090755	PAE1850
AE009441	P	1090765	PAE1850
AE009441	P	1090766	PAE1850
AE009441	P	1090767	PAE1850
AE009441	P	1090768	PAE1850
AE009441	P	1090771	PAE1850
AE009441	P	1165893	PAE1983
AE009441	P	1165894	PAE1983
AE009441	P	1165895	PAE1983
AE009441	P	1187634	PAE2017
AE009441	P	1187636	PAE2017
AE009441	P	1189289	PAE2020
AE009441	P	1189294	PAE2020
AE009441	P	1189296	PAE2020
AE009441	P	1245354	PAE2116
AE009441	P	1245356	PAE2116
AE009441	P	1245357	PAE2116
AE009441	P	1245358	PAE2116
AE009441	P	1245359	PAE2116
AE009441	P	1245363	PAE2116
AE009441	P	1245364	PAE2116
AE009441	P	1312550	PAE2219
AE009441	P	1312551	PAE2219
AE009441	P	1312552	PAE2219
AE009441	P	1312554	PAE2219
AE009441	P	1320907	PAE2234
AE009441	P	1359854	PAE2291
AE009441	P	1359855	PAE2291
AE009441	P	1360494	PAE2293
AE009441	P	1360495	PAE2293
AE009441	P	1360496	PAE2293
AE009441	P	1360497	PAE2293
AE009441	P	1360498	PAE2293
AE009441	P	1360499	PAE2293
AE009441	P	1372149	PAE2309
AE009441	P	1499937	PAE2509
AE009441	P	1499938	PAE2509
AE009441	P	1558165	PAE2616
AE009441	P	1558171	PAE2616
AE009441	P	1588585	PAE2668
AE009441	P	1645629	PAE2775
AE009441	P	1648071	PAE2780
AE009441	P	1702160	PAE2874
AE009441	P	1708542	PAE2883
AE009441	P	1708545	PAE2883
AE009441	P	1709780	PAE2884
AE009441	P	1709781	PAE2884
AE009441	P	1709782	PAE2884
AE009441	P	1747111	PAE2939
AE009441	P	1759210	PAE2955
AE009441	P	1759211	PAE2955
AE009441	P	1759212	PAE2955
AE009441	P	1759213	PAE2955
AE009441	P	1759214	PAE2955
AE009441	P	1789168	PAE3003
AE009441	P	1792080	PAE3008
AE009441	P	1792082	PAE3008
AE009441	P	1882248	PAE3158
AE009441	P	1882254	PAE3158
AE009441	P	1889401	PAE3169
AE009441	P	1889402	PAE3169
AE009441	P	1919263	PAE3207
AE009441	P	1919267	PAE3207
AE009441	P	1919295	PAE3207
AE009441	P	1919296	PAE3207
AE009441	P	1924457	PAE3214
AE009441	P	1924458	PAE3214
AE009441	P	1924459	PAE3214
AE009441	P	1943749	PAE3244
AE009441	P	1969936	PAE3282
AE009441	P	1969937	PAE3282
AE009441	P	1999157	PAE3339
AE009441	P	1999158	PAE3339
AE009441	P	2013259	PAE3361
AE009441	P	2013260	PAE3361
AE009441	P	2013261	PAE3361
AE009441	P	2028004	PAE3383
AE009441	P	2028005	PAE3383
AE009441	P	2091674	PAE3480
AE009441	P	2091675	PAE3480
AE009441	P	2091676	PAE3480
AE009441	P	2091709	PAE3480
AE009441	P	2103731	PAE3504
AE009441	P	2103732	PAE3504
AE009441	P	2107574	PAE3513
AE009441	P	2107597	PAE3513
AE009441	P	2107598	PAE3513
AE009441	P	2107599	PAE3513
AE009441	P	2107600	PAE3513
AE009441	P	2153642	PAE3592
AE009441	P	2153643	PAE3592
AE009441	P	2183399	PAE3627
AE009441	P	2219081	PAE3685
AE009441	M	17050	PAE0039
AE009441	M	17051	PAE0039
AE009441	M	17052	PAE0039
AE009441	M	17067	PAE0039
AE009441	M	40950	PAE0075
AE009441	M	40951	PAE0075
AE009441	M	40952	PAE0075
AE009441	M	40953	PAE0075
AE009441	M	40954	PAE0075
AE009441	M	186046	PAE0331
AE009441	M	277499	PAE0513
AE009441	M	313413	PAE0583
AE009441	M	380309	PAE0692
AE009441	M	380310	PAE0692
AE009441	M	380311	PAE0692
AE009441	M	400107	PAE0721
AE009441	M	400109	PAE0721
AE009441	M	416402	PAE0748
AE009441	M	671697	PAE1142
AE009441	M	671698	PAE1142
AE009441	M	772483	PAE1302
AE009441	M	772490	PAE1302
AE009441	M	873551	PAE1489
AE009441	M	873553	PAE1489
AE009441	M	888803	PAE1521
AE009441	M	888804	PAE1521
AE009441	M	888836	PAE1521
AE009441	M	888837	PAE1521
AE009441	M	888838	PAE1521
AE009441	M	888839	PAE1521
AE009441	M	888840	PAE1521
AE009441	M	888841	PAE1521
AE009441	M	901911	PAE1546
AE009441	M	963337	PAE1646
AE009441	M	963338	PAE1646
AE009441	M	976380	PAE1665
AE009441	M	982300	PAE1674
AE009441	M	982301	PAE1674
AE009441	M	1001094	PAE1714
AE009441	M	1025460	PAE1755
AE009441	M	1046164	PAE1780
AE009441	M	1046166	PAE1780
AE009441	M	1046177	PAE1780
AE009441	M	1048191	PAE1783
AE009441	M	1048192	PAE1783
AE009441	M	1051593	PAE1788
AE009441	M	1051594	PAE1788
AE009441	M	1064039	PAE1807
AE009441	M	1064066	PAE1807
AE009441	M	1064067	PAE1807
AE009441	M	1148249	PAE1951
AE009441	M	1148250	PAE1951
AE009441	M	1192170	PAE2028
AE009441	M	1192173	PAE2028
AE009441	M	1192176	PAE2028
AE009441	M	1196921	PAE2034
AE009441	M	1223018	PAE2075
AE009441	M	1223039	PAE2075
AE009441	M	1223040	PAE2075
AE009441	M	1223042	PAE2075
AE009441	M	1277488	PAE2165
AE009441	M	1277489	PAE2165
AE009441	M	1350655	PAE2282
AE009441	M	1350656	PAE2282
AE009441	M	1350657	PAE2282
AE009441	M	1350658	PAE2282
AE009441	M	1412532	PAE2374
AE009441	M	1415344	PAE2378
AE009441	M	1415346	PAE2378
AE009441	M	1447222	PAE2429
AE009441	M	1447223	PAE2429
AE009441	M	1447224	PAE2429
AE009441	M	1447225	PAE2429
AE009441	M	1447226	PAE2429
AE009441	M	1552779	PAE2605
AE009441	M	1552780	PAE2605
AE009441	M	1552781	PAE2605
AE009441	M	1552782	PAE2605
AE009441	M	1552783	PAE2605
AE009441	M	1552784	PAE2605
AE009441	M	1552785	PAE2605
AE009441	M	1552786	PAE2605
AE009441	M	1552787	PAE2605
AE009441	M	1552788	PAE2605
AE009441	M	1582204	PAE2661
AE009441	M	1582205	PAE2661
AE009441	M	1683900	PAE2847
AE009441	M	1711419	PAE2889
AE009441	M	1711420	PAE2889
AE009441	M	1711421	PAE2889
AE009441	M	1711422	PAE2889
AE009441	M	1730005	PAE2913
AE009441	M	1730006	PAE2913
AE009441	M	1730007	PAE2913
AE009441	M	1730008	PAE2913
AE009441	M	1730009	PAE2913
AE009441	M	1730012	PAE2913
AE009441	M	1739390	PAE2929
AE009441	M	1739392	PAE2929
AE009441	M	1747111	PAE2940
AE009441	M	1747130	PAE2940
AE009441	M	1747131	PAE2940
AE009441	M	1796527	PAE3017
AE009441	M	1796528	PAE3017
AE009441	M	1796529	PAE3017
AE009441	M	1796530	PAE3017
AE009441	M	1796531	PAE3017
AE009441	M	1796533	PAE3017
AE009441	M	1796534	PAE3017
AE009441	M	1796535	PAE3017
AE009441	M	1796536	PAE3017
AE009441	M	1796537	PAE3017
AE009441	M	1796538	PAE3017
AE009441	M	1796539	PAE3017
AE009441	M	1882278	PAE3159
AE009441	M	1943857	PAE3245
AE009441	M	1943858	PAE3245
AE009441	M	1964730	PAE3274
AE009441	M	1964731	PAE3274
AE009441	M	1964747	PAE3274
AE009441	M	1964748	PAE3274
AE009441	M	1973784	PAE3294
AE009441	M	1973787	PAE3294
AE009441	M	1973788	PAE3294
AE009441	M	1973792	PAE3294
AE009441	M	1973793	PAE3294
AE009441	M	1973794	PAE3294
AE009441	M	1973795	PAE3294
AE009441	M	1979240	PAE3301
AE009441	M	1997765	PAE3338
AE009441	M	2003174	PAE3348
AE009441	M	2029160	PAE3390
AE009441	M	2029161	PAE3390
AE009441	M	2029192	PAE3390
AE009441	M	2030621	PAE3394a
AE009441	M	2030622	PAE3394a
AE009441	M	2063238	PAE3442
AE009441	M	2071259	PAE3453
AE009441	M	2071260	PAE3453
AE009441	M	2071261	PAE3453
AE009441	M	2071262	PAE3453
AE009441	M	2099079	PAE3497
AE009441	M	2099080	PAE3497
AE009441	M	2099081	PAE3497
AE009441	M	2099084	PAE3497
AE009441	M	2099086	PAE3497
AE009441	M	2099087	PAE3497
AE009441	M	2099088	PAE3497
AE009441	M	2099091	PAE3497
AE009441	M	2099092	PAE3497
AE009441	M	2099093	PAE3497
AE009441	M	2100653	PAE3500
AE009441	M	2101450	PAE3501a
AE009441	M	2128881	PAE3550
AE009441	M	2208213	PAE3667
AE009441	M	2208217	PAE3667
AE009441	M	2208218	PAE3667
AE009441	M	2208222	PAE3667
AE009441	M	2208234	PAE3667
AE009441	M	2208235	PAE3667
AE009950	P	10918	PF0010
AE009950	P	136645	PF0131
AE009950	P	141406	PF0131.3n
AE009950	P	141414	PF0131.3n
AE009950	P	141424	PF0131.3n
AE009950	P	141425	PF0131.3n
AE009950	P	141438	PF0131.3n
AE009950	P	141439	PF0131.3n
AE009950	P	141440	PF0131.3n
AE009950	P	141441	PF0131.3n
AE009950	P	141442	PF0131.3n
AE009950	P	141455	PF0131.3n
AE009950	P	141456	PF0131.3n
AE009950	P	141457	PF0131.3n
AE009950	P	141461	PF0131.3n
AE009950	P	141462	PF0131.3n
AE009950	P	236804	PF0220
AE009950	P	236805	PF0220
AE009950	P	236812	PF0220
AE009950	P	236813	PF0220
AE009950	P	236814	PF0220
AE009950	P	236815	PF0220
AE009950	P	236818	PF0220
AE009950	P	236819	PF0220
AE009950	P	236820	PF0220
AE009950	P	236821	PF0220
AE009950	P	236822	PF0220
AE009950	P	236823	PF0220
AE009950	P	236828	PF0220
AE009950	P	332135	PF0317
AE009950	P	332136	PF0317
AE009950	P	332137	PF0317
AE009950	P	332138	PF0317
AE009950	P	334055	PF0318
AE009950	P	334056	PF0318
AE009950	P	361408	PF0347
AE009950	P	361423	PF0347
AE009950	P	361424	PF0347
AE009950	P	361425	PF0347
AE009950	P	361428	PF0347
AE009950	P	361440	PF0347
AE009950	P	361441	PF0347
AE009950	P	361448	PF0347
AE009950	P	361449	PF0347
AE009950	P	361451	PF0347
AE009950	P	395579	PF0385
AE009950	P	477350	PF0462
AE009950	P	477351	PF0462
AE009950	P	477352	PF0462
AE009950	P	477389	PF0462
AE009950	P	477395	PF0462
AE009950	P	505790	PF0488
AE009950	P	526136	PF0506
AE009950	P	575553	PF0558
AE009950	P	581209	PF0563
AE009950	P	581210	PF0563
AE009950	P	581211	PF0563
AE009950	P	581212	PF0563
AE009950	P	581237	PF0563
AE009950	P	581251	PF0563
AE009950	P	658479	PF0645
AE009950	P	658480	PF0645
AE009950	P	658482	PF0645
AE009950	P	658483	PF0645
AE009950	P	658484	PF0645
AE009950	P	658485	PF0645
AE009950	P	658506	PF0645
AE009950	P	658507	PF0645
AE009950	P	658508	PF0645
AE009950	P	658509	PF0645
AE009950	P	681767	PF0670.1n
AE009950	P	698915	PF0687.2n
AE009950	P	706917	PF0700
AE009950	P	706918	PF0700
AE009950	P	707079	PF0701
AE009950	P	707096	PF0701
AE009950	P	707097	PF0701
AE009950	P	707098	PF0701
AE009950	P	707114	PF0701
AE009950	P	754933	PF0760
AE009950	P	765875	PF0775
AE009950	P	765898	PF0775
AE009950	P	766278	PF0776
AE009950	P	766279	PF0776
AE009950	P	766280	PF0776
AE009950	P	766332	PF0776
AE009950	P	850190	PF0876.1n
AE009950	P	850191	PF0876.1n
AE009950	P	850192	PF0876.1n
AE009950	P	1020117	PF1066
AE009950	P	1035573	PF1085
AE009950	P	1035575	PF1085
AE009950	P	1334393	PF1420
AE009950	P	1334394	PF1420
AE009950	P	1334395	PF1420
AE009950	P	1334396	PF1420
AE009950	P	1334397	PF1420
AE009950	P	1334398	PF1420
AE009950	P	1334405	PF1420
AE009950	P	1334413	PF1420
AE009950	P	1733880	PF1880
AE009950	M	10921	PF0011
AE009950	M	13741	PF0015
AE009950	M	13742	PF0015
AE009950	M	51687	PF0044
AE009950	M	128163	PF0122
AE009950	M	128169	PF0122
AE009950	M	128170	PF0122
AE009950	M	128178	PF0122
AE009950	M	138742	PF0131.1n
AE009950	M	138782	PF0131.1n
AE009950	M	138783	PF0131.1n
AE009950	M	138784	PF0131.1n
AE009950	M	138793	PF0131.1n
AE009950	M	138807	PF0131.1n
AE009950	M	138808	PF0131.1n
AE009950	M	140099	PF0131.2n
AE009950	M	140100	PF0131.2n
AE009950	M	140101	PF0131.2n
AE009950	M	140129	PF0131.2n
AE009950	M	140137	PF0131.2n
AE009950	M	140138	PF0131.2n
AE009950	M	140139	PF0131.2n
AE009950	M	140152	PF0131.2n
AE009950	M	140153	PF0131.2n
AE009950	M	140161	PF0131.2n
AE009950	M	164065	PF0156
AE009950	M	164066	PF0156
AE009950	M	164072	PF0156
AE009950	M	164073	PF0156
AE009950	M	164074	PF0156
AE009950	M	288376	PF0277
AE009950	M	288378	PF0277
AE009950	M	307100	PF0291
AE009950	M	307101	PF0291
AE009950	M	307103	PF0291
AE009950	M	325250	PF0309
AE009950	M	329119	PF0313
AE009950	M	329122	PF0313
AE009950	M	329148	PF0313
AE009950	M	329153	PF0313
AE009950	M	337290	PF0322
AE009950	M	337291	PF0322
AE009950	M	352433	PF0339
AE009950	M	352434	PF0339
AE009950	M	361453	PF0348
AE009950	M	361454	PF0348
AE009950	M	361455	PF0348
AE009950	M	361460	PF0348
AE009950	M	477351	PF0463
AE009950	M	477352	PF0463
AE009950	M	477388	PF0463
AE009950	M	581248	PF0564
AE009950	M	581250	PF0564
AE009950	M	581251	PF0564
AE009950	M	596014	PF0576
AE009950	M	596015	PF0576
AE009950	M	596016	PF0576
AE009950	M	616139	PF0595
AE009950	M	616140	PF0595
AE009950	M	616141	PF0595
AE009950	M	700102	PF0691
AE009950	M	700105	PF0691
AE009950	M	700106	PF0691
AE009950	M	700107	PF0691
AE009950	M	808485	PF0829
AE009950	M	808486	PF0829
AE009950	M	808488	PF0829
AE009950	M	927904	PF0968
AE009950	M	989966	PF1034
AE009950	M	989967	PF1034
AE009950	M	1035574	PF1086
AE009950	M	1035575	PF1086
AE009950	M	1035576	PF1086
AE009950	M	1035577	PF1086
AE009950	M	1035578	PF1086
AE009950	M	1035592	PF1086
AE009950	M	1035593	PF1086
AE009950	M	1036391	PF1088
AE009950	M	1040661	PF1096
AE009950	M	1040662	PF1096
AE009950	M	1040663	PF1096
AE009950	M	1040664	PF1096
AE009950	M	1044015	PF1097
AE009950	M	1044019	PF1097
AE009950	M	1109693	PF1161
AE009950	M	1109694	PF1161
AE009950	M	1142195	PF1200
AE009950	M	1142196	PF1200
AE009950	M	1142230	PF1200
AE009950	M	1142231	PF1200
AE009950	M	1270905	PF1352
AE009950	M	1270907	PF1352
AE009950	M	1270908	PF1352
AE009950	M	1270909	PF1352
AE009950	M	1387314	PF1484
AE009950	M	1387315	PF1484
AE009950	M	1387325	PF1484
AE009950	M	1387337	PF1484
AE009950	M	1387366	PF1484
AE009950	M	1387369	PF1484
AE009950	M	1394782	PF1496
AE009950	M	1394783	PF1496
AE009950	M	1394784	PF1496
AE009950	M	1413404	PF1515
AE009950	M	1454941	PF1560
AE009950	M	1462994	PF1565
AE009950	M	1495178	PF1603
AE009950	M	1495179	PF1603
AE009950	M	1495180	PF1603
AE009950	M	1495185	PF1603
AE009950	M	1495198	PF1603
AE009950	M	1495200	PF1603
AE009950	M	1536564	PF1650
AE009950	M	1536565	PF1650
AE009950	M	1536566	PF1650
AE009950	M	1537080	PF1651
AE009950	M	1537082	PF1651
AE009950	M	1537083	PF1651
AE009950	M	1537099	PF1651
AE009950	M	1537101	PF1651
AE009950	M	1537102	PF1651
AE009950	M	1537106	PF1651
AE009950	M	1662369	PF1788
AE009950	M	1662370	PF1788
AE009950	M	1675362	PF1806
AE009950	M	1676226	PF1808
AE009950	M	1676229	PF1808
AE009950	M	1676795	PF1809
AE009950	M	1676796	PF1809
AE009950	M	1676798	PF1809
AE009950	M	1677207	PF1810
AE009950	M	1680410	PF1818
AE009950	M	1680411	PF1818
AE009950	M	1681731	PF1821
AE009950	M	1682137	PF1822
AE009950	M	1682138	PF1822
[truncated: 26,830 more rows]
