# Supplementary material for: Genome-Wide miRNA Seeds Prediction in Archaea
Source: Archaea. 2014 May 14;2014:671059. doi: 10.1155/2014/671059 (PMC4053300; doi:10.1155/2014/671059)
Supplement: Supplementary file 3 [file 671059.f3.xls]

## Sheet: AE004437
Annotation Cluster 1	Enrichment Score: 2.3887336816190308
Category	Term	Count	%	PValue	Genes	List Total	Pop Hits	Pop Total	Fold Enrichment	Bonferroni	Benjamini	FDR
INTERPRO	IPR002559:Transposase, IS4-like	6	14.6341	0.000195311	VNG0213H, VNG0059H, VNG1653H, VNG1587H, VNG0035H, VNG0052H	24	74	2981	10.0709	0.00642517	0.00642517	0.170349
GOTERM_MF_FAT	GO:0004803~transposase activity	6	14.6341	0.000356777	VNG0213H, VNG0059H, VNG1653H, VNG1587H, VNG0035H, VNG0052H	15	82	1670	8.14634	0.0124118	0.0124118	0.315577
GOTERM_BP_FAT	GO:0006313~transposition, DNA-mediated	6	14.6341	0.000719257	VNG0213H, VNG0059H, VNG1653H, VNG1587H, VNG0035H, VNG0052H	14	88	1415	6.89123	0.0332518	0.0332518	0.681081
GOTERM_BP_FAT	GO:0032196~transposition	6	14.6341	0.000719257	VNG0213H, VNG0059H, VNG1653H, VNG1587H, VNG0035H, VNG0052H	14	88	1415	6.89123	0.0332518	0.0332518	0.681081
GOTERM_BP_FAT	GO:0006310~DNA recombination	6	14.6341	0.00266401	VNG0213H, VNG0059H, VNG1653H, VNG1587H, VNG0035H, VNG0052H	14	117	1415	5.18315	0.117835	0.0607633	2.50188
GOTERM_MF_FAT	GO:0003677~DNA binding	7	17.0732	0.0248833	VNG0213H, VNG0059H, VNG1653H, VNG1587H, VNG0035H, VNG0194H, VNG0052H	15	296	1670	2.63288	0.586019	0.356586	20.0042
GOTERM_BP_FAT	GO:0006259~DNA metabolic process	6	14.6341	0.0327025	VNG0213H, VNG0059H, VNG1653H, VNG1587H, VNG0035H, VNG0052H	14	211	1415	2.87407	0.790432	0.406016	27.08
SP_PIR_KEYWORDS	plasmid	5	12.1951	0.993605	VNG0213H, VNG0059H, VNG1653H, VNG0052H, VNG0112H	41	1136	4709	0.505518	1	1	100

## Sheet: AE006641
Annotation Cluster 1	Enrichment Score: 14.673811449140356
Category	Term	Count	%	PValue	Genes	List Total	Pop Hits	Pop Total	Fold Enrichment	Bonferroni	Benjamini	FDR
GOTERM_MF_FAT	GO:0004803~transposase activity	28	26.1682	9.95251e-18	SSO1924, SSO1731, SSO0850, SSO1639, SSO2855, SSO1966, SSO2883, SSO2312, SSO1943, SSO2889, SSO3027, SSO1480, SSO1396, SSO1484, SSO1722, SSO2722, SSO8359, SSO1603, SSO2320, SSO1627, SSO1791, SSO2542, SSO1708, SSO1951, SSO1972, SSO1509, SSO0541, SSO1699	49	113	1267	6.40708	6.7677e-16	6.7677e-16	1.02389e-14
INTERPRO	IPR003346:Transposase, IS116/IS110/IS902	18	16.8224	3.04904e-17	SSO2722, SSO1722, SSO1924, SSO8359, SSO1731, SSO1603, SSO0850, SSO1791, SSO2542, SSO1639, SSO1708, SSO1966, SSO1951, SSO2312, SSO1943, SSO1972, SSO1484, SSO1699	80	32	2122	14.9203	2.83561e-15	2.83561e-15	3.33794e-14
GOTERM_BP_FAT	GO:0006313~transposition, DNA-mediated	28	26.1682	5.15502e-17	SSO1924, SSO1731, SSO0850, SSO1639, SSO2855, SSO1966, SSO2883, SSO2312, SSO1943, SSO2889, SSO3027, SSO1480, SSO1396, SSO1484, SSO1722, SSO2722, SSO8359, SSO1603, SSO2320, SSO1627, SSO1791, SSO2542, SSO1708, SSO1951, SSO1972, SSO1509, SSO0541, SSO1699	41	113	912	5.51176	4.12402e-15	4.12402e-15	5.48039e-14
GOTERM_BP_FAT	GO:0032196~transposition	28	26.1682	5.15502e-17	SSO1924, SSO1731, SSO0850, SSO1639, SSO2855, SSO1966, SSO2883, SSO2312, SSO1943, SSO2889, SSO3027, SSO1480, SSO1396, SSO1484, SSO1722, SSO2722, SSO8359, SSO1603, SSO2320, SSO1627, SSO1791, SSO2542, SSO1708, SSO1951, SSO1972, SSO1509, SSO0541, SSO1699	41	113	912	5.51176	4.12402e-15	4.12402e-15	5.48039e-14
GOTERM_BP_FAT	GO:0006310~DNA recombination	28	26.1682	4.55611e-15	SSO1924, SSO1731, SSO0850, SSO1639, SSO2855, SSO1966, SSO2883, SSO2312, SSO1943, SSO2889, SSO3027, SSO1480, SSO1396, SSO1484, SSO1722, SSO2722, SSO8359, SSO1603, SSO2320, SSO1627, SSO1791, SSO2542, SSO1708, SSO1951, SSO1972, SSO1509, SSO0541, SSO1699	41	132	912	4.7184	3.64153e-13	1.82077e-13	4.84057e-12
GOTERM_BP_FAT	GO:0006259~DNA metabolic process	29	27.1028	1.6478e-12	SSO1924, SSO1731, SSO0774, SSO0850, SSO1639, SSO2855, SSO1966, SSO2883, SSO2312, SSO1943, SSO2889, SSO3027, SSO1480, SSO1396, SSO1484, SSO1722, SSO2722, SSO8359, SSO1603, SSO2320, SSO1627, SSO1791, SSO2542, SSO1708, SSO1951, SSO1972, SSO1509, SSO0541, SSO1699	41	179	912	3.60376	1.31823e-10	4.39412e-11	1.7518e-09
GOTERM_MF_FAT	GO:0003677~DNA binding	31	28.972	3.17148e-11	SSO1924, SSO1731, SSO0774, SSO0850, SSO0157, SSO1639, SSO2855, SSO1966, SSO2883, SSO2312, SSO1943, SSO2889, SSO3027, SSO1480, SSO1396, SSO1484, SSO1722, SSO2722, SSO8359, SSO1603, SSO2320, SSO1627, SSO5826, SSO1791, SSO2542, SSO1708, SSO1951, SSO1972, SSO1509, SSO0541, SSO1699	49	248	1267	3.23214	2.15661e-09	1.07831e-09	3.26274e-08
Annotation Cluster 2	Enrichment Score: 0.12372964479263854
Category	Term	Count	%	PValue	Genes	List Total	Pop Hits	Pop Total	Fold Enrichment	Bonferroni	Benjamini	FDR
GOTERM_BP_FAT	GO:0006355~regulation of transcription, DNA-dependent	3	2.80374	0.738425	SSO5826, SSO0157, SSO0280	41	58	912	1.15055	1	1	99.9999
GOTERM_BP_FAT	GO:0051252~regulation of RNA metabolic process	3	2.80374	0.738425	SSO5826, SSO0157, SSO0280	41	58	912	1.15055	1	1	99.9999
GOTERM_BP_FAT	GO:0045449~regulation of transcription	3	2.80374	0.780185	SSO5826, SSO0157, SSO0280	41	63	912	1.05923	1	1	100
Annotation Cluster 3	Enrichment Score: 0.00821158984670257
Category	Term	Count	%	PValue	Genes	List Total	Pop Hits	Pop Total	Fold Enrichment	Bonferroni	Benjamini	FDR
GOTERM_MF_FAT	GO:0001883~purine nucleoside binding	6	5.60748	0.96385	SSO1545, SSO3148, SSO2283, SSO0774, SSO0965, SSO0925	49	238	1267	0.651861	1	1	100
GOTERM_MF_FAT	GO:0030554~adenyl nucleotide binding	6	5.60748	0.96385	SSO1545, SSO3148, SSO2283, SSO0774, SSO0965, SSO0925	49	238	1267	0.651861	1	1	100
GOTERM_MF_FAT	GO:0001882~nucleoside binding	6	5.60748	0.965893	SSO1545, SSO3148, SSO2283, SSO0774, SSO0965, SSO0925	49	240	1267	0.646429	1	1	100
GOTERM_MF_FAT	GO:0017076~purine nucleotide binding	6	5.60748	0.977542	SSO1545, SSO3148, SSO2283, SSO0774, SSO0965, SSO0925	49	254	1267	0.610799	1	1	100
GOTERM_MF_FAT	GO:0005524~ATP binding	4	3.73832	0.988988	SSO1545, SSO0774, SSO0965, SSO0925	49	202	1267	0.512023	1	1	100
GOTERM_MF_FAT	GO:0032559~adenyl ribonucleotide binding	4	3.73832	0.989372	SSO1545, SSO0774, SSO0965, SSO0925	49	203	1267	0.5095	1	1	100
GOTERM_MF_FAT	GO:0032555~purine ribonucleotide binding	4	3.73832	0.994041	SSO1545, SSO0774, SSO0965, SSO0925	49	219	1267	0.472277	1	1	100
GOTERM_MF_FAT	GO:0032553~ribonucleotide binding	4	3.73832	0.994041	SSO1545, SSO0774, SSO0965, SSO0925	49	219	1267	0.472277	1	1	100
GOTERM_MF_FAT	GO:0000166~nucleotide binding	6	5.60748	0.994611	SSO1545, SSO3148, SSO2283, SSO0774, SSO0965, SSO0925	49	298	1267	0.520614	1	1	100
Annotation Cluster 4	Enrichment Score: 0.004727660683748502
Category	Term	Count	%	PValue	Genes	List Total	Pop Hits	Pop Total	Fold Enrichment	Bonferroni	Benjamini	FDR
GOTERM_MF_FAT	GO:0046872~metal ion binding	4	3.73832	0.987317	SSO0259, SSO0417, SSO0280, SSO0098	49	198	1267	0.522367	1	1	100
GOTERM_MF_FAT	GO:0043167~ion binding	4	3.73832	0.990102	SSO0259, SSO0417, SSO0280, SSO0098	49	205	1267	0.50453	1	1	100
GOTERM_MF_FAT	GO:0043169~cation binding	4	3.73832	0.990102	SSO0259, SSO0417, SSO0280, SSO0098	49	205	1267	0.50453	1	1	100

## Sheet: AE008384
Annotation Cluster 1	Enrichment Score: 2.225930095537608
Category	Term	Count	%	PValue	Genes	List Total	Pop Hits	Pop Total	Fold Enrichment	Bonferroni	Benjamini	FDR
GOTERM_BP_FAT	GO:0006259~DNA metabolic process	15	12.1951	0.00116568	MM_3027, MM_2695, MM_1836, MM_2507, MM_1192, MM_2683, MM_2682, MM_2419, MM_0258, MM_1430, MM_2198, MM_0422, MM_0430, MM_2698, MM_2697	49	136	1100	2.47599	0.149664	0.149664	1.36505
INTERPRO	IPR002559:Transposase, IS4-like	4	3.25203	0.00489959	MM_0258, MM_3027, MM_2507, MM_1192	83	11	2452	10.7426	0.572462	0.346136	5.83278
GOTERM_BP_FAT	GO:0006310~DNA recombination	8	6.50407	0.00514131	MM_0258, MM_1430, MM_3027, MM_2507, MM_0422, MM_1192, MM_2697, MM_2682	49	51	1100	3.52141	0.511534	0.301097	5.89344
GOTERM_BP_FAT	GO:0032196~transposition	7	5.69106	0.00704624	MM_0258, MM_1430, MM_3027, MM_2507, MM_0422, MM_1192, MM_2697	49	41	1100	3.83275	0.625774	0.217862	7.99507
GOTERM_BP_FAT	GO:0006313~transposition, DNA-mediated	7	5.69106	0.00704624	MM_0258, MM_1430, MM_3027, MM_2507, MM_0422, MM_1192, MM_2697	49	41	1100	3.83275	0.625774	0.217862	7.99507
GOTERM_MF_FAT	GO:0004803~transposase activity	6	4.87805	0.0302477	MM_0258, MM_1430, MM_3027, MM_2507, MM_0422, MM_1192	65	40	1427	3.29308	0.972501	0.698163	29.5992
Annotation Cluster 2	Enrichment Score: 1.424307320585093
Category	Term	Count	%	PValue	Genes	List Total	Pop Hits	Pop Total	Fold Enrichment	Bonferroni	Benjamini	FDR
INTERPRO	IPR000477:RNA-directed DNA polymerase (reverse transcriptase)	3	2.43902	0.00324338	MM_2695, MM_2683, MM_2698	83	3	2452	29.5422	0.429942	0.429942	3.89704
SP_PIR_KEYWORDS	rna-directed dna polymerase	3	2.43902	0.00399309	MM_2695, MM_2683, MM_2698	123	3	3290	26.748	0.187839	0.187839	3.81273
GOTERM_BP_FAT	GO:0006278~RNA-dependent DNA replication	3	2.43902	0.00544211	MM_2695, MM_2683, MM_2698	49	3	1100	22.449	0.531641	0.223408	6.22819
GOTERM_MF_FAT	GO:0003964~RNA-directed DNA polymerase activity	3	2.43902	0.00577185	MM_2695, MM_2683, MM_2698	65	3	1427	21.9538	0.491994	0.287255	6.40041
SP_PIR_KEYWORDS	nucleotidyltransferase	6	4.87805	0.0309383	MM_2695, MM_1398, MM_1759, MM_2626, MM_2683, MM_2698	123	48	3290	3.3435	0.804892	0.55829	26.3123
GOTERM_MF_FAT	GO:0016779~nucleotidyltransferase activity	6	4.87805	0.101613	MM_2695, MM_1398, MM_1759, MM_2626, MM_2683, MM_2698	65	56	1427	2.3522	0.999996	0.918522	70.6072
GOTERM_MF_FAT	GO:0034061~DNA polymerase activity	3	2.43902	0.112412	MM_2695, MM_2683, MM_2698	65	13	1427	5.06627	0.999999	0.902248	74.4006
GOTERM_BP_FAT	GO:0006260~DNA replication	4	3.25203	0.149311	MM_2695, MM_1836, MM_2683, MM_2698	49	31	1100	2.89664	1	0.988841	85.1268
GOTERM_MF_FAT	GO:0003723~RNA binding	5	4.06504	0.427044	MM_2695, MM_2622, MM_2683, MM_2698, MM_2132	65	74	1427	1.48337	1	0.997325	99.8278
SP_PIR_KEYWORDS	transferase	14	11.3821	0.623323	MM_2695, MM_2355, MM_1398, MM_1519, MM_2626, MM_2683, MM_0686, MM_0905, MM_0300, MM_0246, MM_0671, MM_3109, MM_1759, MM_2698	123	369	3290	1.01483	1	0.966113	99.9924
Annotation Cluster 3	Enrichment Score: 0.9847144788455114
Category	Term	Count	%	PValue	Genes	List Total	Pop Hits	Pop Total	Fold Enrichment	Bonferroni	Benjamini	FDR
KEGG_PATHWAY	mma00240:Pyrimidine metabolism	6	4.87805	0.027872	MM_1398, MM_2011, MM_1759, MM_1423, MM_2626, MM_1628	31	42	703	3.23963	0.478038	0.478038	20.0734
SP_PIR_KEYWORDS	nucleotidyltransferase	6	4.87805	0.0309383	MM_2695, MM_1398, MM_1759, MM_2626, MM_2683, MM_2698	123	48	3290	3.3435	0.804892	0.55829	26.3123
KEGG_PATHWAY	mma00230:Purine metabolism	6	4.87805	0.043152	MM_0941, MM_1398, MM_1759, MM_2806, MM_0801, MM_2626	31	47	703	2.89499	0.637433	0.397865	29.5056
GOTERM_MF_FAT	GO:0016779~nucleotidyltransferase activity	6	4.87805	0.101613	MM_2695, MM_1398, MM_1759, MM_2626, MM_2683, MM_2698	65	56	1427	2.3522	0.999996	0.918522	70.6072
SP_PIR_KEYWORDS	dna-directed rna polymerase	3	2.43902	0.116741	MM_1398, MM_1759, MM_2626	123	16	3290	5.01524	0.998428	0.658992	70.0628
GOTERM_MF_FAT	GO:0034062~RNA polymerase activity	3	2.43902	0.175113	MM_1398, MM_1759, MM_2626	65	17	1427	3.87421	1	0.959951	88.9168
GOTERM_MF_FAT	GO:0003899~DNA-directed RNA polymerase activity	3	2.43902	0.175113	MM_1398, MM_1759, MM_2626	65	17	1427	3.87421	1	0.959951	88.9168
SP_PIR_KEYWORDS	Transcription	4	3.25203	0.262336	MM_1398, MM_3117, MM_1759, MM_2626	123	48	3290	2.229	1	0.861618	94.7981
GOTERM_BP_FAT	GO:0006350~transcription	4	3.25203	0.386577	MM_1398, MM_3117, MM_1759, MM_2626	49	51	1100	1.7607	1	0.999988	99.6846
Annotation Cluster 4	Enrichment Score: 0.7601796382550678
Category	Term	Count	%	PValue	Genes	List Total	Pop Hits	Pop Total	Fold Enrichment	Bonferroni	Benjamini	FDR
SP_PIR_KEYWORDS	zinc-finger	3	2.43902	0.0413971	MM_1398, MM_2626, MM_0600	123	9	3290	8.91599	0.889028	0.519451	33.6855
GOTERM_MF_FAT	GO:0008270~zinc ion binding	6	4.87805	0.0740695	MM_1398, MM_2413, MM_2011, MM_1423, MM_2626, MM_0600	65	51	1427	2.58281	0.999877	0.894702	58.4948
SP_PIR_KEYWORDS	zinc	4	3.25203	0.097778	MM_1398, MM_2011, MM_2626, MM_0600	123	30	3290	3.5664	0.995254	0.737533	63.2006
SP_PIR_KEYWORDS	metal-binding	9	7.31707	0.100051	MM_1815, MM_1824, MM_1398, MM_0121, MM_2011, MM_0801, MM_2626, MM_0686, MM_0600	123	128	3290	1.88072	0.995838	0.665908	64.0915
GOTERM_MF_FAT	GO:0046872~metal ion binding	14	11.3821	0.379297	MM_1398, MM_2413, MM_0121, MM_0801, MM_2626, MM_1423, MM_3283, MM_0686, MM_1815, MM_1824, MM_2011, MM_0756, MM_3042, MM_0600	65	260	1427	1.18213	1	0.996227	99.5701
GOTERM_MF_FAT	GO:0043169~cation binding	14	11.3821	0.379297	MM_1398, MM_2413, MM_0121, MM_0801, MM_2626, MM_1423, MM_3283, MM_0686, MM_1815, MM_1824, MM_2011, MM_0756, MM_3042, MM_0600	65	260	1427	1.18213	1	0.996227	99.5701
GOTERM_MF_FAT	GO:0043167~ion binding	14	11.3821	0.379297	MM_1398, MM_2413, MM_0121, MM_0801, MM_2626, MM_1423, MM_3283, MM_0686, MM_1815, MM_1824, MM_2011, MM_0756, MM_3042, MM_0600	65	260	1427	1.18213	1	0.996227	99.5701
GOTERM_MF_FAT	GO:0046914~transition metal ion binding	10	8.13008	0.506468	MM_1824, MM_1398, MM_2413, MM_0121, MM_2011, MM_1423, MM_2626, MM_3042, MM_0686, MM_0600	65	193	1427	1.1375	1	0.998977	99.9687
Annotation Cluster 5	Enrichment Score: 0.5505748153121831
Category	Term	Count	%	PValue	Genes	List Total	Pop Hits	Pop Total	Fold Enrichment	Bonferroni	Benjamini	FDR
KEGG_PATHWAY	mma00633:Trinitrotoluene degradation	3	2.43902	0.145884	MM_0121, MM_0688, MM_0686	31	16	703	4.25202	0.973399	0.701486	71.3464
KEGG_PATHWAY	mma00680:Methane metabolism	3	2.43902	0.208262	MM_0121, MM_0688, MM_0686	31	20	703	3.40161	0.995351	0.738879	84.2921
GOTERM_BP_FAT	GO:0006091~generation of precursor metabolites and energy	4	3.25203	0.733936	MM_0121, MM_0688, MM_0628, MM_0686	49	85	1100	1.05642	1	0.999999	100
Annotation Cluster 6	Enrichment Score: 0.2433898344680901
Category	Term	Count	%	PValue	Genes	List Total	Pop Hits	Pop Total	Fold Enrichment	Bonferroni	Benjamini	FDR
GOTERM_BP_FAT	GO:0016053~organic acid biosynthetic process	5	4.06504	0.426977	MM_0871, MM_0671, MM_1504, MM_1885, MM_1107	49	76	1100	1.47691	1	0.999984	99.8587
GOTERM_BP_FAT	GO:0046394~carboxylic acid biosynthetic process	5	4.06504	0.426977	MM_0871, MM_0671, MM_1504, MM_1885, MM_1107	49	76	1100	1.47691	1	0.999984	99.8587
GOTERM_BP_FAT	GO:0008652~cellular amino acid biosynthetic process	4	3.25203	0.649831	MM_0671, MM_1504, MM_1885, MM_1107	49	75	1100	1.19728	1	1	99.9996
GOTERM_BP_FAT	GO:0009309~amine biosynthetic process	4	3.25203	0.710447	MM_0671, MM_1504, MM_1885, MM_1107	49	82	1100	1.09507	1	1	100
GOTERM_BP_FAT	GO:0044271~nitrogen compound biosynthetic process	9	7.31707	0.720958	MM_0941, MM_0671, MM_2011, MM_1504, MM_1885, MM_0801, MM_0756, MM_1234, MM_1107	49	209	1100	0.966702	1	1	100
Annotation Cluster 7	Enrichment Score: 0.21135695106980157
Category	Term	Count	%	PValue	Genes	List Total	Pop Hits	Pop Total	Fold Enrichment	Bonferroni	Benjamini	FDR
SP_PIR_KEYWORDS	methanogenesis	3	2.43902	0.361389	MM_0688, MM_0628, MM_0686	123	34	3290	2.36011	1	0.925063	98.7184
GOTERM_BP_FAT	GO:0015947~methane metabolic process	3	2.43902	0.607695	MM_0688, MM_0628, MM_0686	49	46	1100	1.46406	1	0.999999	99.9984
GOTERM_BP_FAT	GO:0015975~energy derivation by oxidation of reduced inorganic compounds	3	2.43902	0.607695	MM_0688, MM_0628, MM_0686	49	46	1100	1.46406	1	0.999999	99.9984
GOTERM_BP_FAT	GO:0015948~methanogenesis	3	2.43902	0.607695	MM_0688, MM_0628, MM_0686	49	46	1100	1.46406	1	0.999999	99.9984
GOTERM_BP_FAT	GO:0043446~cellular alkane metabolic process	3	2.43902	0.607695	MM_0688, MM_0628, MM_0686	49	46	1100	1.46406	1	0.999999	99.9984
GOTERM_BP_FAT	GO:0043447~alkane biosynthetic process	3	2.43902	0.607695	MM_0688, MM_0628, MM_0686	49	46	1100	1.46406	1	0.999999	99.9984
GOTERM_BP_FAT	GO:0009061~anaerobic respiration	3	2.43902	0.607695	MM_0688, MM_0628, MM_0686	49	46	1100	1.46406	1	0.999999	99.9984
GOTERM_BP_FAT	GO:0006091~generation of precursor metabolites and energy	4	3.25203	0.733936	MM_0121, MM_0688, MM_0628, MM_0686	49	85	1100	1.05642	1	0.999999	100
GOTERM_BP_FAT	GO:0045333~cellular respiration	3	2.43902	0.742883	MM_0688, MM_0628, MM_0686	49	59	1100	1.14147	1	0.999999	100
GOTERM_BP_FAT	GO:0015980~energy derivation by oxidation of organic compounds	3	2.43902	0.775825	MM_0688, MM_0628, MM_0686	49	63	1100	1.069	1	0.999998	100
Annotation Cluster 8	Enrichment Score: 0.19103977416948512
Category	Term	Count	%	PValue	Genes	List Total	Pop Hits	Pop Total	Fold Enrichment	Bonferroni	Benjamini	FDR
GOTERM_MF_FAT	GO:0016151~nickel ion binding	3	2.43902	0.191581	MM_0121, MM_3042, MM_0686	65	18	1427	3.65897	1	0.955416	91.1978
SP_PIR_KEYWORDS	iron-sulfur	3	2.43902	0.52581	MM_1824, MM_0121, MM_0686	123	47	3290	1.70732	1	0.970614	99.9289
SP_PIR_KEYWORDS	iron	3	2.43902	0.581178	MM_1824, MM_0121, MM_0686	123	52	3290	1.54315	1	0.960544	99.9787
GOTERM_MF_FAT	GO:0051536~iron-sulfur cluster binding	6	4.87805	0.759588	MM_1824, MM_0121, MM_1615, MM_0755, MM_3042, MM_0686	65	138	1427	0.954515	1	0.999993	100
GOTERM_MF_FAT	GO:0051540~metal cluster binding	6	4.87805	0.759588	MM_1824, MM_0121, MM_1615, MM_0755, MM_3042, MM_0686	65	138	1427	0.954515	1	0.999993	100
GOTERM_MF_FAT	GO:0005506~iron ion binding	3	2.43902	0.919511	MM_1824, MM_0121, MM_0686	65	89	1427	0.740017	1	1	100
GOTERM_MF_FAT	GO:0009055~electron carrier activity	3	2.43902	0.964034	MM_1824, MM_0121, MM_1615	65	109	1427	0.604234	1	1	100
GOTERM_BP_FAT	GO:0055114~oxidation reduction	4	3.25203	0.98943	MM_0121, MM_0628, MM_1615, MM_3042	49	176	1100	0.510204	1	1	100
Annotation Cluster 9	Enrichment Score: 0.10009189971890015
Category	Term	Count	%	PValue	Genes	List Total	Pop Hits	Pop Total	Fold Enrichment	Bonferroni	Benjamini	FDR
GOTERM_BP_FAT	GO:0009165~nucleotide biosynthetic process	3	2.43902	0.759827	MM_0941, MM_2011, MM_0801	49	61	1100	1.10405	1	0.999998	100
GOTERM_BP_FAT	GO:0034404~nucleobase, nucleoside and nucleotide biosynthetic process	3	2.43902	0.811904	MM_0941, MM_2011, MM_0801	49	68	1100	0.990396	1	0.999999	100
GOTERM_BP_FAT	GO:0034654~nucleobase, nucleoside, nucleotide and nucleic acid biosynthetic process	3	2.43902	0.811904	MM_0941, MM_2011, MM_0801	49	68	1100	0.990396	1	0.999999	100
Annotation Cluster 10	Enrichment Score: 0.07601907964636237
Category	Term	Count	%	PValue	Genes	List Total	Pop Hits	Pop Total	Fold Enrichment	Bonferroni	Benjamini	FDR
GOTERM_MF_FAT	GO:0003700~transcription factor activity	3	2.43902	0.746216	MM_2694, MM_1398, MM_3117	65	58	1427	1.13554	1	0.999996	100
GOTERM_MF_FAT	GO:0030528~transcription regulator activity	3	2.43902	0.881647	MM_2694, MM_1398, MM_3117	65	79	1427	0.83369	1	1	100
GOTERM_BP_FAT	GO:0045449~regulation of transcription	4	3.25203	0.899049	MM_2694, MM_1398, MM_3117, MM_0333	49	116	1100	0.774103	1	1	100
Annotation Cluster 11	Enrichment Score: 0.025535253519127922
Category	Term	Count	%	PValue	Genes	List Total	Pop Hits	Pop Total	Fold Enrichment	Bonferroni	Benjamini	FDR
GOTERM_BP_FAT	GO:0045449~regulation of transcription	4	3.25203	0.899049	MM_2694, MM_1398, MM_3117, MM_0333	49	116	1100	0.774103	1	1	100
GOTERM_BP_FAT	GO:0006355~regulation of transcription, DNA-dependent	3	2.43902	0.965618	MM_2694, MM_3117, MM_0333	49	112	1100	0.601312	1	1	100
GOTERM_BP_FAT	GO:0051252~regulation of RNA metabolic process	3	2.43902	0.965618	MM_2694, MM_3117, MM_0333	49	112	1100	0.601312	1	1	100
Annotation Cluster 12	Enrichment Score: 0.005027006385210104
Category	Term	Count	%	PValue	Genes	List Total	Pop Hits	Pop Total	Fold Enrichment	Bonferroni	Benjamini	FDR
SP_PIR_KEYWORDS	nucleotide-binding	5	4.06504	0.922728	MM_0905, MM_1836, MM_0801, MM_1334, MM_2419	123	186	3290	0.719031	1	0.999603	100
SP_PIR_KEYWORDS	atp-binding	4	3.25203	0.958322	MM_0905, MM_1836, MM_1334, MM_2419	123	171	3290	0.625683	1	0.999897	100
GOTERM_MF_FAT	GO:0017076~purine nucleotide binding	7	5.69106	0.999138	MM_0905, MM_1836, MM_0801, MM_1334, MM_0561, MM_3042, MM_2419	65	334	1427	0.460111	1	1	100
GOTERM_MF_FAT	GO:0001883~purine nucleoside binding	6	4.87805	0.99939	MM_0905, MM_1836, MM_1334, MM_0561, MM_3042, MM_2419	65	310	1427	0.424913	1	1	100
GOTERM_MF_FAT	GO:0030554~adenyl nucleotide binding	6	4.87805	0.99939	MM_0905, MM_1836, MM_1334, MM_0561, MM_3042, MM_2419	65	310	1427	0.424913	1	1	100
GOTERM_MF_FAT	GO:0032553~ribonucleotide binding	6	4.87805	0.999487	MM_0905, MM_1836, MM_0801, MM_1334, MM_0561, MM_2419	65	314	1427	0.4195	1	1	100
GOTERM_MF_FAT	GO:0032555~purine ribonucleotide binding	6	4.87805	0.999487	MM_0905, MM_1836, MM_0801, MM_1334, MM_0561, MM_2419	65	314	1427	0.4195	1	1	100
GOTERM_MF_FAT	GO:0001882~nucleoside binding	6	4.87805	0.99953	MM_0905, MM_1836, MM_1334, MM_0561, MM_3042, MM_2419	65	316	1427	0.416845	1	1	100
GOTERM_MF_FAT	GO:0032559~adenyl ribonucleotide binding	5	4.06504	0.999675	MM_0905, MM_1836, MM_1334, MM_0561, MM_2419	65	290	1427	0.378515	1	1	100
GOTERM_MF_FAT	GO:0005524~ATP binding	5	4.06504	0.999675	MM_0905, MM_1836, MM_1334, MM_0561, MM_2419	65	290	1427	0.378515	1	1	100
GOTERM_MF_FAT	GO:0000166~nucleotide binding	7	5.69106	0.999894	MM_0905, MM_1836, MM_0801, MM_1334, MM_0561, MM_3042, MM_2419	65	382	1427	0.402296	1	1	100

## Sheet: AE009441
Annotation Cluster 1	Enrichment Score: 0.6438873988703194
Category	Term	Count	%	PValue	Genes	List Total	Pop Hits	Pop Total	Fold Enrichment	Bonferroni	Benjamini	FDR
INTERPRO	IPR002314:Aminoacyl-tRNA synthetase, class II (G, H, P and S), conserved region	3	2.43902	0.0166095	PAE1748, PAE3158, PAE2165	70	5	1612	13.8171	0.905731	0.905731	17.9522
GOTERM_BP_FAT	GO:0006418~tRNA aminoacylation for protein translation	4	3.25203	0.0422666	PAE1748, PAE2940, PAE3158, PAE2165	23	23	626	4.73346	0.967014	0.967014	36.7434
GOTERM_BP_FAT	GO:0043038~amino acid activation	4	3.25203	0.0422666	PAE1748, PAE2940, PAE3158, PAE2165	23	23	626	4.73346	0.967014	0.967014	36.7434
GOTERM_BP_FAT	GO:0043039~tRNA aminoacylation	4	3.25203	0.0422666	PAE1748, PAE2940, PAE3158, PAE2165	23	23	626	4.73346	0.967014	0.967014	36.7434
INTERPRO	IPR006195:Aminoacyl-tRNA synthetase, class II, conserved region	3	2.43902	0.065081	PAE1748, PAE3158, PAE2165	70	10	1612	6.90857	0.999924	0.991299	54.8423
GOTERM_MF_FAT	GO:0004812~aminoacyl-tRNA ligase activity	4	3.25203	0.0671466	PAE1748, PAE2940, PAE3158, PAE2165	34	26	892	4.0362	0.997635	0.997635	52.8203
GOTERM_MF_FAT	GO:0016875~ligase activity, forming carbon-oxygen bonds	4	3.25203	0.0671466	PAE1748, PAE2940, PAE3158, PAE2165	34	26	892	4.0362	0.997635	0.997635	52.8203
GOTERM_MF_FAT	GO:0016876~ligase activity, forming aminoacyl-tRNA and related compounds	4	3.25203	0.0671466	PAE1748, PAE2940, PAE3158, PAE2165	34	26	892	4.0362	0.997635	0.997635	52.8203
GOTERM_BP_FAT	GO:0006399~tRNA metabolic process	5	4.06504	0.0748433	PAE1142, PAE1748, PAE2940, PAE3158, PAE2165	23	47	626	2.89547	0.997857	0.953708	56.1747
KEGG_PATHWAY	pai00970:Aminoacyl-tRNA biosynthesis	4	3.25203	0.0800683	PAE1748, PAE2940, PAE3158, PAE2165	24	25	551	3.67333	0.90336	0.90336	50.2501
GOTERM_BP_FAT	GO:0034660~ncRNA metabolic process	5	4.06504	0.0900401	PAE1142, PAE1748, PAE2940, PAE3158, PAE2165	23	50	626	2.72174	0.999421	0.916647	63.2341
SP_PIR_KEYWORDS	Aminoacyl-tRNA synthetase	4	3.25203	0.0981362	PAE1748, PAE2940, PAE3158, PAE2165	121	24	2574	3.54545	0.963313	0.963313	59.1225
SP_PIR_KEYWORDS	protein biosynthesis	4	3.25203	0.185088	PAE1748, PAE2940, PAE3158, PAE2165	121	32	2574	2.65909	0.998569	0.962176	83.0119
SP_PIR_KEYWORDS	ligase	4	3.25203	0.298426	PAE1748, PAE2940, PAE3158, PAE2165	121	41	2574	2.07539	0.999988	0.80215	95.3562
SP_PIR_KEYWORDS	cytoplasm	5	4.06504	0.576325	PAE3500, PAE1748, PAE2940, PAE3158, PAE2165	121	86	2574	1.23679	1	0.96778	99.9411
GOTERM_BP_FAT	GO:0006412~translation	4	3.25203	0.689387	PAE1748, PAE2940, PAE3158, PAE2165	23	97	626	1.12237	1	0.99999	99.9996
GOTERM_MF_FAT	GO:0001883~purine nucleoside binding	8	6.50407	0.74865	PAE3383, PAE1748, PAE2940, PAE0692, PAE2219, PAE3158, PAE2165, PAE0721	34	221	892	0.949694	1	0.999955	100
GOTERM_MF_FAT	GO:0030554~adenyl nucleotide binding	8	6.50407	0.74865	PAE3383, PAE1748, PAE2940, PAE0692, PAE2219, PAE3158, PAE2165, PAE0721	34	221	892	0.949694	1	0.999955	100
GOTERM_MF_FAT	GO:0001882~nucleoside binding	8	6.50407	0.758058	PAE3383, PAE1748, PAE2940, PAE0692, PAE2219, PAE3158, PAE2165, PAE0721	34	223	892	0.941176	1	0.999925	100
GOTERM_MF_FAT	GO:0005524~ATP binding	7	5.69106	0.790882	PAE3383, PAE1748, PAE2940, PAE0692, PAE2219, PAE3158, PAE2165	34	201	892	0.913667	1	0.99994	100
GOTERM_MF_FAT	GO:0032559~adenyl ribonucleotide binding	7	5.69106	0.790882	PAE3383, PAE1748, PAE2940, PAE0692, PAE2219, PAE3158, PAE2165	34	201	892	0.913667	1	0.99994	100
GOTERM_MF_FAT	GO:0017076~purine nucleotide binding	8	6.50407	0.84637	PAE3383, PAE1748, PAE2940, PAE0692, PAE2219, PAE3158, PAE2165, PAE0721	34	245	892	0.856663	1	0.999931	100
GOTERM_MF_FAT	GO:0000166~nucleotide binding	9	7.31707	0.866971	PAE3383, PAE3500, PAE1748, PAE2940, PAE0692, PAE2219, PAE3158, PAE2165, PAE0721	34	281	892	0.840276	1	0.999942	100
GOTERM_MF_FAT	GO:0032553~ribonucleotide binding	7	5.69106	0.878475	PAE3383, PAE1748, PAE2940, PAE0692, PAE2219, PAE3158, PAE2165	34	225	892	0.816209	1	0.999936	100
GOTERM_MF_FAT	GO:0032555~purine ribonucleotide binding	7	5.69106	0.878475	PAE3383, PAE1748, PAE2940, PAE0692, PAE2219, PAE3158, PAE2165	34	225	892	0.816209	1	0.999936	100
SP_PIR_KEYWORDS	atp-binding	4	3.25203	0.969646	PAE1748, PAE2940, PAE3158, PAE2165	121	144	2574	0.590909	1	0.999986	100
SP_PIR_KEYWORDS	nucleotide-binding	4	3.25203	0.983602	PAE1748, PAE2940, PAE3158, PAE2165	121	160	2574	0.531818	1	0.999994	100
Annotation Cluster 2	Enrichment Score: 0.6063019199352401
Category	Term	Count	%	PValue	Genes	List Total	Pop Hits	Pop Total	Fold Enrichment	Bonferroni	Benjamini	FDR
UP_SEQ_FEATURE	metal ion-binding site:Zinc	3	2.43902	0.065855	PAE3500, PAE0675A, PAE2940	10	14	286	6.12857	0.805041	0.805041	42.1015
SP_PIR_KEYWORDS	zinc	4	3.25203	0.197123	PAE3500, PAE0675A, PAE1748, PAE2940	121	33	2574	2.57851	0.999111	0.903855	85.0657
GOTERM_MF_FAT	GO:0046914~transition metal ion binding	7	5.69106	0.270207	PAE3500, PAE0675A, PAE1748, PAE2940, PAE2116, PAE2661, PAE1355	34	119	892	1.54325	1	0.999892	96.6771
SP_PIR_KEYWORDS	metal-binding	6	4.87805	0.297541	PAE3500, PAE0675A, PAE1748, PAE2940, PAE2116, PAE2661	121	78	2574	1.63636	0.999988	0.847953	95.3053
GOTERM_MF_FAT	GO:0008270~zinc ion binding	4	3.25203	0.311735	PAE3500, PAE0675A, PAE1748, PAE2940	34	53	892	1.98002	1	0.999704	98.2359
GOTERM_MF_FAT	GO:0046872~metal ion binding	8	6.50407	0.33832	PAE3500, PAE0675A, PAE1748, PAE2940, PAE0583, PAE2116, PAE2661, PAE1355	34	154	892	1.36287	1	0.999243	98.8475
GOTERM_MF_FAT	GO:0043169~cation binding	8	6.50407	0.358056	PAE3500, PAE0675A, PAE1748, PAE2940, PAE0583, PAE2116, PAE2661, PAE1355	34	157	892	1.33683	1	0.998383	99.1692
GOTERM_MF_FAT	GO:0043167~ion binding	8	6.50407	0.358056	PAE3500, PAE0675A, PAE1748, PAE2940, PAE0583, PAE2116, PAE2661, PAE1355	34	157	892	1.33683	1	0.998383	99.1692
Annotation Cluster 3	Enrichment Score: 0.5332392541297571
Category	Term	Count	%	PValue	Genes	List Total	Pop Hits	Pop Total	Fold Enrichment	Bonferroni	Benjamini	FDR
KEGG_PATHWAY	pai03020:RNA polymerase	3	2.43902	0.0853146	PAE0675A, PAE0671, PAE3480	24	12	551	5.73958	0.91766	0.713051	52.5743
KEGG_PATHWAY	pai00240:Pyrimidine metabolism	3	2.43902	0.523188	PAE0675A, PAE0671, PAE3480	24	41	551	1.67988	1	0.984197	99.7962
KEGG_PATHWAY	pai00230:Purine metabolism	3	2.43902	0.56312	PAE0675A, PAE0671, PAE3480	24	44	551	1.56534	1	0.979026	99.902
Annotation Cluster 4	Enrichment Score: 0.5146988842056598
Category	Term	Count	%	PValue	Genes	List Total	Pop Hits	Pop Total	Fold Enrichment	Bonferroni	Benjamini	FDR
GOTERM_BP_FAT	GO:0045449~regulation of transcription	4	3.25203	0.18676	PAE3500, PAE0675A, PAE1484, PAE2309	23	43	626	2.53185	1	0.983142	88.834
GOTERM_BP_FAT	GO:0006355~regulation of transcription, DNA-dependent	3	2.43902	0.391119	PAE3500, PAE1484, PAE2309	23	38	626	2.14874	1	0.996299	99.4812
GOTERM_BP_FAT	GO:0051252~regulation of RNA metabolic process	3	2.43902	0.391119	PAE3500, PAE1484, PAE2309	23	38	626	2.14874	1	0.996299	99.4812
Annotation Cluster 5	Enrichment Score: 0.42590521618286203
Category	Term	Count	%	PValue	Genes	List Total	Pop Hits	Pop Total	Fold Enrichment	Bonferroni	Benjamini	FDR
GOTERM_BP_FAT	GO:0006508~proteolysis	3	2.43902	0.338356	PAE1302, PAE2116, PAE1983	23	34	626	2.40153	1	0.995653	98.7475
GOTERM_MF_FAT	GO:0070011~peptidase activity, acting on L-amino acid peptides	3	2.43902	0.375156	PAE1302, PAE2116, PAE1983	34	35	892	2.24874	1	0.997104	99.3794
GOTERM_MF_FAT	GO:0008233~peptidase activity	3	2.43902	0.415622	PAE1302, PAE2116, PAE1983	34	38	892	2.07121	1	0.997097	99.699

## Sheet: AE009950
Annotation Cluster 1	Enrichment Score: 0.7938482886690003
Category	Term	Count	%	PValue	Genes	List Total	Pop Hits	Pop Total	Fold Enrichment	Bonferroni	Benjamini	FDR
GOTERM_CC_FAT	GO:0016021~integral to membrane	4	5.7971	0.100053	PF1848, PF1603, PF0011, PF1496	5	72	223	2.47778	0.468748	0.468748	39.6208
GOTERM_CC_FAT	GO:0031224~intrinsic to membrane	4	5.7971	0.103876	PF1848, PF1603, PF0011, PF1496	5	73	223	2.44384	0.482145	0.280378	40.8385
SP_PIR_KEYWORDS	transmembrane	3	4.34783	0.399676	PF1603, PF0011, PF1496	62	46	2054	2.16059	1	1	98.6547
Annotation Cluster 2	Enrichment Score: 0.05602276009461736
Category	Term	Count	%	PValue	Genes	List Total	Pop Hits	Pop Total	Fold Enrichment	Bonferroni	Benjamini	FDR
GOTERM_MF_FAT	GO:0017076~purine nucleotide binding	7	10.1449	0.803652	PF1954, PF0309, PF1097, PF0564, PF1910, PF1515, PF1882	30	262	1012	0.901272	1	1	100
GOTERM_MF_FAT	GO:0000166~nucleotide binding	8	11.5942	0.804477	PF1954, PF0309, PF1848, PF1097, PF0564, PF1910, PF1515, PF1882	30	300	1012	0.899556	1	1	100
GOTERM_MF_FAT	GO:0001883~purine nucleoside binding	6	8.69565	0.855323	PF0309, PF1097, PF0564, PF1910, PF1515, PF1882	30	240	1012	0.843333	1	1	100
GOTERM_MF_FAT	GO:0030554~adenyl nucleotide binding	6	8.69565	0.855323	PF0309, PF1097, PF0564, PF1910, PF1515, PF1882	30	240	1012	0.843333	1	1	100
GOTERM_MF_FAT	GO:0001882~nucleoside binding	6	8.69565	0.860809	PF0309, PF1097, PF0564, PF1910, PF1515, PF1882	30	242	1012	0.836364	1	1	100
GOTERM_MF_FAT	GO:0032553~ribonucleotide binding	6	8.69565	0.868735	PF1954, PF0309, PF1097, PF0564, PF1515, PF1882	30	245	1012	0.826122	1	1	100
GOTERM_MF_FAT	GO:0032555~purine ribonucleotide binding	6	8.69565	0.868735	PF1954, PF0309, PF1097, PF0564, PF1515, PF1882	30	245	1012	0.826122	1	1	100
GOTERM_MF_FAT	GO:0005524~ATP binding	5	7.24638	0.912211	PF0309, PF1097, PF0564, PF1515, PF1882	30	223	1012	0.756353	1	1	100
GOTERM_MF_FAT	GO:0032559~adenyl ribonucleotide binding	5	7.24638	0.912211	PF0309, PF1097, PF0564, PF1515, PF1882	30	223	1012	0.756353	1	1	100
SP_PIR_KEYWORDS	atp-binding	3	4.34783	0.96832	PF0564, PF1515, PF1882	62	170	2054	0.58463	1	1	100
SP_PIR_KEYWORDS	nucleotide-binding	3	4.34783	0.977274	PF0564, PF1515, PF1882	62	182	2054	0.546083	1	1	100

## Sheet: AE010299
Annotation Cluster 1	Enrichment Score: 15.635668010034655
Category	Term	Count	%	PValue	Genes	List Total	Pop Hits	Pop Total	Fold Enrichment	Bonferroni	Benjamini	FDR
GOTERM_BP_FAT	GO:0006313~transposition, DNA-mediated	27	15.4286	1.86573e-22	MA0472, MA2670, MA1986, MA2947, MA2946, MA1638, MA4670, MA0984, MA2733, MA2734, MA0257, MA4107, MA3511, MA4227, MA2680, MA3005, MA3004, MA1649, MA1314, MA2785, MA0944, MA3772, MA2786, MA3338, MA1880, MA3312, MA3313	49	70	1257	9.89475	1.56721e-20	1.56721e-20	2.00264e-19
GOTERM_BP_FAT	GO:0032196~transposition	27	15.4286	1.86573e-22	MA0472, MA2670, MA1986, MA2947, MA2946, MA1638, MA4670, MA0984, MA2733, MA2734, MA0257, MA4107, MA3511, MA4227, MA2680, MA3005, MA3004, MA1649, MA1314, MA2785, MA0944, MA3772, MA2786, MA3338, MA1880, MA3312, MA3313	49	70	1257	9.89475	1.56721e-20	1.56721e-20	2.00264e-19
GOTERM_BP_FAT	GO:0006310~DNA recombination	27	15.4286	8.9194e-20	MA0472, MA2670, MA1986, MA2947, MA2946, MA1638, MA4670, MA0984, MA2733, MA2734, MA0257, MA4107, MA3511, MA4227, MA2680, MA3005, MA3004, MA1649, MA1314, MA2785, MA0944, MA3772, MA2786, MA3338, MA1880, MA3312, MA3313	49	86	1257	8.05387	7.49229e-18	3.74615e-18	9.57395e-17
GOTERM_MF_FAT	GO:0004803~transposase activity	22	12.5714	1.13189e-19	MA0472, MA2670, MA1986, MA2680, MA2947, MA1638, MA3004, MA1649, MA1314, MA4670, MA3772, MA0944, MA2786, MA3338, MA2733, MA0984, MA1880, MA0257, MA3312, MA4107, MA3313, MA4227	53	54	1625	12.4913	9.84743e-18	9.84743e-18	1.2233e-16
GOTERM_BP_FAT	GO:0006259~DNA metabolic process	29	16.5714	3.04403e-11	MA0472, MA0454, MA2670, MA1986, MA2947, MA2946, MA1638, MA4670, MA0984, MA2733, MA2734, MA0257, MA4107, MA3511, MA4227, MA2680, MA3005, MA3004, MA1649, MA1314, MA2785, MA0944, MA3772, MA2786, MA3338, MA1880, MA3645, MA3312, MA3313	49	211	1257	3.52578	2.55699e-09	8.52329e-10	3.26742e-08
INTERPRO	IPR002559:Transposase, IS4-like	12	6.85714	1.07646e-09	MA0472, MA3338, MA2670, MA2680, MA1986, MA0984, MA2947, MA1638, MA3313, MA4227, MA3772, MA0944	102	30	3024	11.8588	1.36711e-07	1.36711e-07	1.24838e-06
GOTERM_MF_FAT	GO:0003677~DNA binding	28	16	3.08348e-09	MA0472, MA0454, MA2670, MA1986, MA2947, MA1638, MA4670, MA1815, MA0984, MA2733, MA0257, MA4107, MA4227, MA2493, MA2680, MA3004, MA1649, MA1314, MA4040, MA0944, MA3772, MA2786, MA3338, MA1880, MA0207, MA3312, MA1863, MA3313	53	272	1625	3.15622	2.68262e-07	1.34131e-07	3.33249e-06
Annotation Cluster 2	Enrichment Score: 0.40443775116022657
Category	Term	Count	%	PValue	Genes	List Total	Pop Hits	Pop Total	Fold Enrichment	Bonferroni	Benjamini	FDR
GOTERM_CC_FAT	GO:0030529~ribonucleoprotein complex	5	2.85714	0.0390143	MA1080, MA4117, MA3195, MA0923, MA1258	8	66	311	2.94508	0.511455	0.511455	25.4234
KEGG_PATHWAY	mac03010:Ribosome	3	1.71429	0.242848	MA4117, MA0923, MA1258	11	69	729	2.88142	0.93808	0.93808	81.1838
GOTERM_CC_FAT	GO:0005840~ribosome	3	1.71429	0.413429	MA4117, MA0923, MA1258	8	61	311	1.91189	0.999932	0.99178	98.0401
GOTERM_MF_FAT	GO:0003735~structural constituent of ribosome	3	1.71429	0.562077	MA4117, MA0923, MA1258	53	58	1625	1.58588	1	1	99.9867
GOTERM_CC_FAT	GO:0043232~intracellular non-membrane-bounded organelle	3	1.71429	0.567117	MA4117, MA0923, MA1258	8	79	311	1.47627	1	0.99342	99.7913
GOTERM_CC_FAT	GO:0043228~non-membrane-bounded organelle	3	1.71429	0.567117	MA4117, MA0923, MA1258	8	79	311	1.47627	1	0.99342	99.7913
GOTERM_MF_FAT	GO:0005198~structural molecule activity	3	1.71429	0.590098	MA4117, MA0923, MA1258	53	61	1625	1.50789	1	1	99.9935
SP_PIR_KEYWORDS	ribosomal protein	3	1.71429	0.701595	MA4117, MA0923, MA1258	174	60	4311	1.23879	1	1	99.9963
GOTERM_BP_FAT	GO:0006412~translation	4	2.28571	0.781538	MA0722, MA4117, MA0923, MA1258	49	105	1257	0.977259	1	1	100
Annotation Cluster 3	Enrichment Score: 0.2771917770630129
Category	Term	Count	%	PValue	Genes	List Total	Pop Hits	Pop Total	Fold Enrichment	Bonferroni	Benjamini	FDR
COG_ONTOLOGY	Transcription	7	4	0.0827476	MA4622, MA2493, MA0357, MA1815, MA0207, MA3302, MA4040	40	84	1054	2.19583	0.613297	0.378146	41.6118
GOTERM_MF_FAT	GO:0003700~transcription factor activity	4	2.28571	0.460201	MA2493, MA1815, MA0207, MA1863	53	78	1625	1.57233	1	1	99.8723
GOTERM_MF_FAT	GO:0030528~transcription regulator activity	4	2.28571	0.659095	MA2493, MA1815, MA0207, MA1863	53	104	1625	1.17925	1	1	99.9991
GOTERM_BP_FAT	GO:0006355~regulation of transcription, DNA-dependent	4	2.28571	0.950501	MA2493, MA1815, MA0207, MA1863	49	156	1257	0.657771	1	1	100
GOTERM_BP_FAT	GO:0051252~regulation of RNA metabolic process	4	2.28571	0.950501	MA2493, MA1815, MA0207, MA1863	49	156	1257	0.657771	1	1	100
GOTERM_BP_FAT	GO:0045449~regulation of transcription	4	2.28571	0.95784	MA2493, MA1815, MA0207, MA1863	49	161	1257	0.637343	1	1	100
Annotation Cluster 4	Enrichment Score: 0.06875643056260254
Category	Term	Count	%	PValue	Genes	List Total	Pop Hits	Pop Total	Fold Enrichment	Bonferroni	Benjamini	FDR
GOTERM_BP_FAT	GO:0034404~nucleobase, nucleoside and nucleotide biosynthetic process	3	1.71429	0.794658	MA3999, MA0584, MA4608	49	75	1257	1.02612	1	1	100
GOTERM_BP_FAT	GO:0034654~nucleobase, nucleoside, nucleotide and nucleic acid biosynthetic process	3	1.71429	0.794658	MA3999, MA0584, MA4608	49	75	1257	1.02612	1	1	100
GOTERM_BP_FAT	GO:0044271~nitrogen compound biosynthetic process	5	2.85714	0.984851	MA3999, MA1473, MA4540, MA0584, MA4608	49	229	1257	0.560111	1	1	100
Annotation Cluster 5	Enrichment Score: 0.005132824791816653
Category	Term	Count	%	PValue	Genes	List Total	Pop Hits	Pop Total	Fold Enrichment	Bonferroni	Benjamini	FDR
GOTERM_MF_FAT	GO:0016887~ATPase activity	4	2.28571	0.874145	MA3665, MA2548, MA3999, MA0282	53	150	1625	0.81761	1	1	100
SP_PIR_KEYWORDS	atp-binding	3	1.71429	0.998367	MA3665, MA2548, MA0282	174	208	4311	0.357344	1	1	100
GOTERM_MF_FAT	GO:0000166~nucleotide binding	7	4	0.998738	MA3665, MA2548, MA3999, MA1444, MA0282, MA0584, MA1101	53	448	1625	0.479068	1	1	100
GOTERM_MF_FAT	GO:0030554~adenyl nucleotide binding	5	2.85714	0.999141	MA3665, MA2548, MA3999, MA0282, MA0584	53	371	1625	0.413213	1	1	100
GOTERM_MF_FAT	GO:0001883~purine nucleoside binding	5	2.85714	0.999141	MA3665, MA2548, MA3999, MA0282, MA0584	53	371	1625	0.413213	1	1	100
SP_PIR_KEYWORDS	nucleotide-binding	3	1.71429	0.999277	MA3665, MA2548, MA0282	174	229	4311	0.324575	1	1	100
GOTERM_MF_FAT	GO:0001882~nucleoside binding	5	2.85714	0.999294	MA3665, MA2548, MA3999, MA0282, MA0584	53	377	1625	0.406636	1	1	100
GOTERM_MF_FAT	GO:0017076~purine nucleotide binding	5	2.85714	0.999624	MA3665, MA2548, MA3999, MA0282, MA0584	53	396	1625	0.387126	1	1	100
GOTERM_MF_FAT	GO:0032559~adenyl ribonucleotide binding	4	2.28571	0.999683	MA3665, MA2548, MA3999, MA0282	53	351	1625	0.349406	1	1	100
GOTERM_MF_FAT	GO:0005524~ATP binding	4	2.28571	0.999683	MA3665, MA2548, MA3999, MA0282	53	351	1625	0.349406	1	1	100
GOTERM_MF_FAT	GO:0032555~purine ribonucleotide binding	4	2.28571	0.999869	MA3665, MA2548, MA3999, MA0282	53	376	1625	0.326174	1	1	100
GOTERM_MF_FAT	GO:0032553~ribonucleotide binding	4	2.28571	0.999869	MA3665, MA2548, MA3999, MA0282	53	376	1625	0.326174	1	1	100

## Sheet: AE017261
Annotation Cluster 1	Enrichment Score: 0.16359603229495237
Category	Term	Count	%	PValue	Genes	List Total	Pop Hits	Pop Total	Fold Enrichment	Bonferroni	Benjamini	FDR
GOTERM_MF_FAT	GO:0000166~nucleotide binding	5	15.1515	0.411939	PTO1256, PTO1116, PTO1194, PTO0620, PTO0736	15	197	852	1.44162	1	0.999997	99.3698
GOTERM_MF_FAT	GO:0001883~purine nucleoside binding	3	9.09091	0.768725	PTO1256, PTO1194, PTO0736	15	159	852	1.0717	1	1	99.9999
GOTERM_MF_FAT	GO:0030554~adenyl nucleotide binding	3	9.09091	0.768725	PTO1256, PTO1194, PTO0736	15	159	852	1.0717	1	1	99.9999
GOTERM_MF_FAT	GO:0001882~nucleoside binding	3	9.09091	0.772049	PTO1256, PTO1194, PTO0736	15	160	852	1.065	1	1	99.9999
GOTERM_MF_FAT	GO:0017076~purine nucleotide binding	3	9.09091	0.809096	PTO1256, PTO1194, PTO0736	15	172	852	0.990698	1	1	100

## Sheet: AL096836
Annotation Cluster 1	Enrichment Score: 1.7894630005698418
Category	Term	Count	%	PValue	Genes	List Total	Pop Hits	Pop Total	Fold Enrichment	Bonferroni	Benjamini	FDR
GOTERM_BP_FAT	GO:0006355~regulation of transcription, DNA-dependent	6	10	0.00393895	PAB0619, PAB1229, PAB0917, PAB0960, PAB2328, PAB1236	18	46	675	4.8913	0.232357	0.232357	3.96706
GOTERM_BP_FAT	GO:0051252~regulation of RNA metabolic process	6	10	0.00393895	PAB0619, PAB1229, PAB0917, PAB0960, PAB2328, PAB1236	18	46	675	4.8913	0.232357	0.232357	3.96706
GOTERM_MF_FAT	GO:0003700~transcription factor activity	6	10	0.00492353	PAB0619, PAB1229, PAB0917, PAB0960, PAB2328, PAB1236	30	38	935	4.92105	0.292132	0.292132	4.97975
GOTERM_BP_FAT	GO:0045449~regulation of transcription	6	10	0.00522968	PAB0619, PAB1229, PAB0917, PAB0960, PAB2328, PAB1236	18	49	675	4.59184	0.296233	0.161092	5.23575
SP_PIR_KEYWORDS	transcription regulation	5	8.33333	0.00717203	PAB0619, PAB1229, PAB0960, PAB2328, PAB1236	60	24	1771	6.14931	0.244758	0.244758	6.33607
GOTERM_MF_FAT	GO:0030528~transcription regulator activity	6	10	0.00934067	PAB0619, PAB1229, PAB0917, PAB0960, PAB2328, PAB1236	30	44	935	4.25	0.481554	0.279968	9.25549
GOTERM_BP_FAT	GO:0006350~transcription	5	8.33333	0.0143808	PAB0619, PAB1229, PAB0960, PAB2328, PAB1236	18	40	675	4.6875	0.621111	0.276391	13.8056
INTERPRO	IPR011991:Winged helix repressor DNA-binding	5	8.33333	0.0155912	PAB0619, PAB1229, PAB0917, PAB2328, PAB1236	50	31	1526	4.92258	0.785613	0.785613	15.9494
SP_PIR_KEYWORDS	Transcription	5	8.33333	0.029538	PAB0619, PAB1229, PAB0960, PAB2328, PAB1236	60	36	1771	4.09954	0.689427	0.44271	23.8651
GOTERM_MF_FAT	GO:0003677~DNA binding	8	13.3333	0.0444429	PAB0619, PAB1229, PAB0917, PAB1802.1N, PAB0960, PAB2328, PAB1236, PAB0211	30	110	935	2.26667	0.958508	0.653805	37.5298
SP_PIR_KEYWORDS	dna-binding	5	8.33333	0.0521108	PAB0619, PAB1229, PAB0960, PAB2328, PAB1236	60	43	1771	3.43217	0.875965	0.50129	38.5341
INTERPRO	IPR001845:Bacterial regulatory protein, ArsR	3	5	0.0628869	PAB0619, PAB1229, PAB2328	50	13	1526	7.04308	0.99828	0.958523	51.2358
SMART	SM00418:HTH_ARSR	3	5	0.211404	PAB0619, PAB1229, PAB2328	18	13	255	3.26923	0.964028	0.964028	80.0776
Annotation Cluster 2	Enrichment Score: 0.529209860324756
Category	Term	Count	%	PValue	Genes	List Total	Pop Hits	Pop Total	Fold Enrichment	Bonferroni	Benjamini	FDR
INTERPRO	IPR007197:Radical SAM	3	5	0.17855	PAB0712, PAB0577, PAB2039	50	24	1526	3.815	1	0.99838	88.6365
GOTERM_MF_FAT	GO:0051536~iron-sulfur cluster binding	4	6.66667	0.380457	PAB1894, PAB0712, PAB0577, PAB2039	30	71	935	1.75587	1	0.99977	99.2951
GOTERM_MF_FAT	GO:0051540~metal cluster binding	4	6.66667	0.380457	PAB1894, PAB0712, PAB0577, PAB2039	30	71	935	1.75587	1	0.99977	99.2951
Annotation Cluster 3	Enrichment Score: 0.046263075397562525
Category	Term	Count	%	PValue	Genes	List Total	Pop Hits	Pop Total	Fold Enrichment	Bonferroni	Benjamini	FDR
SP_PIR_KEYWORDS	metal-binding	3	5	0.849652	PAB0917, PAB1894, PAB0960	60	98	1771	0.903571	1	0.999974	100
GOTERM_MF_FAT	GO:0046914~transition metal ion binding	3	5	0.884887	PAB1894, PAB0960, PAB0555	30	113	935	0.827434	1	1	100
GOTERM_MF_FAT	GO:0046872~metal ion binding	4	6.66667	0.915232	PAB0917, PAB1894, PAB0960, PAB0555	30	167	935	0.746507	1	1	100
GOTERM_MF_FAT	GO:0043167~ion binding	4	6.66667	0.923661	PAB0917, PAB1894, PAB0960, PAB0555	30	171	935	0.729045	1	1	100
GOTERM_MF_FAT	GO:0043169~cation binding	4	6.66667	0.923661	PAB0917, PAB1894, PAB0960, PAB0555	30	171	935	0.729045	1	1	100
Annotation Cluster 4	Enrichment Score: 0.03333638540906381
Category	Term	Count	%	PValue	Genes	List Total	Pop Hits	Pop Total	Fold Enrichment	Bonferroni	Benjamini	FDR
SP_PIR_KEYWORDS	nucleotide-binding	5	8.33333	0.820112	PAB0917, PAB0249, PAB1722, PAB1725, PAB2086	60	166	1771	0.889056	1	0.999986	100
SP_PIR_KEYWORDS	atp-binding	4	6.66667	0.881615	PAB0249, PAB1722, PAB1725, PAB2086	60	147	1771	0.803175	1	0.99997	100
GOTERM_MF_FAT	GO:0032559~adenyl ribonucleotide binding	5	8.33333	0.916562	PAB0249, PAB1722, PAB2304, PAB1725, PAB2086	30	208	935	0.749199	1	1	100
GOTERM_MF_FAT	GO:0005524~ATP binding	5	8.33333	0.916562	PAB0249, PAB1722, PAB2304, PAB1725, PAB2086	30	208	935	0.749199	1	1	100
GOTERM_MF_FAT	GO:0001883~purine nucleoside binding	5	8.33333	0.942765	PAB0249, PAB1722, PAB2304, PAB1725, PAB2086	30	223	935	0.698804	1	1	100
GOTERM_MF_FAT	GO:0030554~adenyl nucleotide binding	5	8.33333	0.942765	PAB0249, PAB1722, PAB2304, PAB1725, PAB2086	30	223	935	0.698804	1	1	100
GOTERM_MF_FAT	GO:0001882~nucleoside binding	5	8.33333	0.945658	PAB0249, PAB1722, PAB2304, PAB1725, PAB2086	30	225	935	0.692593	1	1	100
GOTERM_MF_FAT	GO:0032553~ribonucleotide binding	5	8.33333	0.952345	PAB0249, PAB1722, PAB2304, PAB1725, PAB2086	30	230	935	0.677536	1	1	100
GOTERM_MF_FAT	GO:0032555~purine ribonucleotide binding	5	8.33333	0.952345	PAB0249, PAB1722, PAB2304, PAB1725, PAB2086	30	230	935	0.677536	1	1	100
GOTERM_MF_FAT	GO:0000166~nucleotide binding	6	10	0.958694	PAB0917, PAB0249, PAB1722, PAB2304, PAB1725, PAB2086	30	275	935	0.68	1	1	100
GOTERM_MF_FAT	GO:0017076~purine nucleotide binding	5	8.33333	0.968307	PAB0249, PAB1722, PAB2304, PAB1725, PAB2086	30	245	935	0.636054	1	1	100

## Sheet: AM774415
Annotation Cluster 1	Enrichment Score: 5.01925211056551
Category	Term	Count	%	PValue	Genes	List Total	Pop Hits	Pop Total	Fold Enrichment	Bonferroni	Benjamini	FDR
GOTERM_BP_FAT	GO:0006313~transposition, DNA-mediated	8	21.0526	9.28318e-08	OE1572R, OE1071F, OE2886R, OE1102R, OE1506R, OE1173F, OE1058R, OE1087R	10	88	1415	12.8636	1.11398e-06	1.11398e-06	5.97249e-05
GOTERM_BP_FAT	GO:0032196~transposition	8	21.0526	9.28318e-08	OE1572R, OE1071F, OE2886R, OE1102R, OE1506R, OE1173F, OE1058R, OE1087R	10	88	1415	12.8636	1.11398e-06	1.11398e-06	5.97249e-05
GOTERM_MF_FAT	GO:0004803~transposase activity	7	18.4211	3.03168e-07	OE1572R, OE2886R, OE1102R, OE1506R, OE1173F, OE1058R, OE1087R	9	82	1670	15.8401	2.72851e-06	2.72851e-06	0.000174473
GOTERM_BP_FAT	GO:0006310~DNA recombination	8	21.0526	6.9798e-07	OE1572R, OE1071F, OE2886R, OE1102R, OE1506R, OE1173F, OE1058R, OE1087R	10	117	1415	9.67521	8.37572e-06	4.18787e-06	0.000449056
INTERPRO	IPR002559:Transposase, IS4-like	7	18.4211	2.79728e-06	OE1572R, OE2886R, OE1102R, OE1506R, OE1173F, OE1058R, OE1087R	19	74	2981	14.8414	4.47556e-05	4.47556e-05	0.00198643
GOTERM_BP_FAT	GO:0006259~DNA metabolic process	8	21.0526	4.13165e-05	OE1572R, OE1071F, OE2886R, OE1102R, OE1506R, OE1173F, OE1058R, OE1087R	10	211	1415	5.36493	0.000495685	0.000165256	0.0265787
GOTERM_MF_FAT	GO:0003677~DNA binding	7	18.4211	0.000602668	OE1572R, OE2886R, OE1102R, OE1506R, OE1173F, OE1058R, OE1087R	9	296	1670	4.38814	0.00541096	0.00270915	0.346339
SP_PIR_KEYWORDS	plasmid	10	26.3158	0.552236	OE2432F, OE1572R, OE1071F, OE2886R, OE1102R, OE1506R, OE1173F, OE1058R, OE1087R, OE2540R	38	1136	4709	1.09085	0.910227	0.910227	92.0287

## Sheet: AP006878
Annotation Cluster 1	Enrichment Score: 1.8891638917042541
Category	Term	Count	%	PValue	Genes	List Total	Pop Hits	Pop Total	Fold Enrichment	Bonferroni	Benjamini	FDR
INTERPRO	IPR010641:Protein of unknown function DUF1225	3	3.57143	0.00444859	TK0298, TK0850, TK0495	66	3	1654	25.0606	0.419542	0.419542	5.00385
INTERPRO	IPR010095:Transposase, IS605 OrfB, C-terminal	3	3.57143	0.0205983	TK0298, TK0850, TK0495	66	6	1654	12.5303	0.921073	0.719061	21.3088
COG_ONTOLOGY	DNA replication, recombination, and repair	6	7.14286	0.0234668	TK1863, TK1620, TK1250, TK0298, TK0850, TK0495	23	33	413	3.26482	0.229883	0.229883	13.7507
Annotation Cluster 2	Enrichment Score: 1.0144256716068956
Category	Term	Count	%	PValue	Genes	List Total	Pop Hits	Pop Total	Fold Enrichment	Bonferroni	Benjamini	FDR
GOTERM_BP_FAT	GO:0009150~purine ribonucleotide metabolic process	4	4.7619	0.0269901	TK1604, TK0836, TK1601, TK0194	24	21	710	5.63492	0.980551	0.980551	27.7059
GOTERM_BP_FAT	GO:0009152~purine ribonucleotide biosynthetic process	4	4.7619	0.0269901	TK1604, TK0836, TK1601, TK0194	24	21	710	5.63492	0.980551	0.980551	27.7059
GOTERM_BP_FAT	GO:0009259~ribonucleotide metabolic process	4	4.7619	0.0428698	TK1604, TK0836, TK1601, TK0194	24	25	710	4.73333	0.998181	0.957351	40.5204
GOTERM_BP_FAT	GO:0009260~ribonucleotide biosynthetic process	4	4.7619	0.0428698	TK1604, TK0836, TK1601, TK0194	24	25	710	4.73333	0.998181	0.957351	40.5204
GOTERM_BP_FAT	GO:0006163~purine nucleotide metabolic process	4	4.7619	0.0572968	TK1604, TK0836, TK1601, TK0194	24	28	710	4.22619	0.999796	0.941116	50.3228
GOTERM_BP_FAT	GO:0006164~purine nucleotide biosynthetic process	4	4.7619	0.0572968	TK1604, TK0836, TK1601, TK0194	24	28	710	4.22619	0.999796	0.941116	50.3228
GOTERM_BP_FAT	GO:0009165~nucleotide biosynthetic process	4	4.7619	0.242481	TK1604, TK0836, TK1601, TK0194	24	53	710	2.2327	1	0.999664	96.2852
GOTERM_BP_FAT	GO:0034404~nucleobase, nucleoside and nucleotide biosynthetic process	4	4.7619	0.297258	TK1604, TK0836, TK1601, TK0194	24	59	710	2.00565	1	0.999295	98.4745
GOTERM_BP_FAT	GO:0034654~nucleobase, nucleoside, nucleotide and nucleic acid biosynthetic process	4	4.7619	0.297258	TK1604, TK0836, TK1601, TK0194	24	59	710	2.00565	1	0.999295	98.4745
GOTERM_BP_FAT	GO:0044271~nitrogen compound biosynthetic process	5	5.95238	0.761778	TK2130, TK1604, TK0836, TK1601, TK0194	24	152	710	0.973136	1	1	100
Annotation Cluster 3	Enrichment Score: 0.10717526974635429
Category	Term	Count	%	PValue	Genes	List Total	Pop Hits	Pop Total	Fold Enrichment	Bonferroni	Benjamini	FDR
GOTERM_BP_FAT	GO:0006259~DNA metabolic process	3	3.57143	0.565022	TK1590, TK1620, TK1318	24	57	710	1.55702	1	0.999998	99.9948
GOTERM_MF_FAT	GO:0000166~nucleotide binding	10	11.9048	0.712472	TK1590, TK1620, TK2130, TK2026, TK1604, TK0901, TK1470, TK1601, TK1318, TK2100	36	282	985	0.970252	1	1	99.9999
GOTERM_MF_FAT	GO:0001883~purine nucleoside binding	8	9.52381	0.722242	TK1590, TK1620, TK2130, TK2026, TK1604, TK1601, TK1318, TK2100	36	225	985	0.97284	1	1	99.9999
GOTERM_MF_FAT	GO:0030554~adenyl nucleotide binding	8	9.52381	0.722242	TK1590, TK1620, TK2130, TK2026, TK1604, TK1601, TK1318, TK2100	36	225	985	0.97284	1	1	99.9999
GOTERM_MF_FAT	GO:0001882~nucleoside binding	8	9.52381	0.736437	TK1590, TK1620, TK2130, TK2026, TK1604, TK1601, TK1318, TK2100	36	228	985	0.960039	1	1	100
GOTERM_MF_FAT	GO:0005524~ATP binding	7	8.33333	0.778774	TK1590, TK1620, TK2130, TK2026, TK1604, TK1601, TK1318	36	207	985	0.925255	1	1	100
GOTERM_MF_FAT	GO:0032559~adenyl ribonucleotide binding	7	8.33333	0.778774	TK1590, TK1620, TK2130, TK2026, TK1604, TK1601, TK1318	36	207	985	0.925255	1	1	100
GOTERM_MF_FAT	GO:0016887~ATPase activity	3	3.57143	0.81147	TK2026, TK1604, TK1601	36	83	985	0.988956	1	0.999999	100
GOTERM_MF_FAT	GO:0017076~purine nucleotide binding	8	9.52381	0.819133	TK1590, TK1620, TK2130, TK2026, TK1604, TK1601, TK1318, TK2100	36	248	985	0.882616	1	0.999997	100
GOTERM_MF_FAT	GO:0032555~purine ribonucleotide binding	7	8.33333	0.863484	TK1590, TK1620, TK2130, TK2026, TK1604, TK1601, TK1318	36	230	985	0.832729	1	0.999999	100
GOTERM_MF_FAT	GO:0032553~ribonucleotide binding	7	8.33333	0.863484	TK1590, TK1620, TK2130, TK2026, TK1604, TK1601, TK1318	36	230	985	0.832729	1	0.999999	100
SP_PIR_KEYWORDS	atp-binding	4	4.7619	0.915336	TK1590, TK1620, TK2026, TK1318	84	149	2298	0.73442	1	1	100
SP_PIR_KEYWORDS	nucleotide-binding	4	4.7619	0.950273	TK1590, TK1620, TK2026, TK1318	84	168	2298	0.651361	1	1	100
Annotation Cluster 4	Enrichment Score: 0.0066610668037606615
Category	Term	Count	%	PValue	Genes	List Total	Pop Hits	Pop Total	Fold Enrichment	Bonferroni	Benjamini	FDR
GOTERM_MF_FAT	GO:0043169~cation binding	4	4.7619	0.979917	TK1770, TK1422, TK0328, TK0194	36	193	985	0.56707	1	1	100
GOTERM_MF_FAT	GO:0043167~ion binding	4	4.7619	0.979917	TK1770, TK1422, TK0328, TK0194	36	193	985	0.56707	1	1	100
GOTERM_MF_FAT	GO:0046872~metal ion binding	3	3.57143	0.994576	TK1422, TK0328, TK0194	36	186	985	0.441308	1	1	100

[truncated: 28 more sheets: BA000001, BA000011, BA000023, CP000077, CP000254, CP000300, CP000477, CP000504, CP000559, CP000561, CP000562, CP000575, CP000609, CP000660, CP000678, CP000682, CP000742, CP000743, CP000816, CP000852 …]
